# Supplementary material for: Control of associative learning by the mediodorsal thalamus-orbitofrontal cortex circuit
Source: Research Square preprint supplement (doi:10.21203/rs.3.rs-6903811/v1), 2025-06-23
Supplement: Supplementary file 1 [file 6ea67f350e16217c9b40b460.xlsx]

## Sheet: Figure 1
	Figure 1c						Figure 1e
	Block #	Hit rate	FA rate	d'			Time after stimulus onset (s) Cell #	-2	-1.9	-1.8	-1.7	-1.6	-1.5	-1.4	-1.3	-1.2	-1.1	-1	-0.9	-0.8	-0.7	-0.6	-0.5	-0.4	-0.3	-0.2	-0.1	0	0.1	0.2	0.3	0.4	0.5	0.6	0.7	0.8	0.9	1	1.1	1.2	1.3	1.4	1.5	1.6	1.7	1.8	1.9	2	2.1
	1	1	1	-0.0974028			1	1	1.75	0.5	1.5	0.5	0.5	1	1.5	1	0.25	1.5	0.5	0.5	0.5	0.25	0.5	0.5	0.75	1	0	0	0	0	0	0	0	0.25	0	0	0	0	0	0.25	0	0	0	0	0	0.25	0	0.25	0
	2	1	0.7	1.12045			2	5	10.5	7.75	6.5	6	3.5	5.5	7.25	6.25	5.25	5.5	6.25	5.5	5.75	4	9.5	7.75	10	5.75	8	5.5	1.25	1.75	1.75	0.75	1	2.5	0.75	0.25	1.25	2.25	1.75	1.25	1.5	1.75	2.5	3.25	2	2.5	1.75	3.75	1.5
	3	1	0.6	1.39151			3	0.25	2.25	0.75	1	1	1	1	0.5	1	0.5	0.5	0	0.5	0.75	0.25	0.75	1.75	0.75	0.75	1	0.25	0	0.25	0.25	0	0	0.25	0	0.25	0	0	0	0	0	0.25	0	0	0.25	0	0	0.25	0
	4	1	0.4	1.8982			4	3.5	4.25	3.5	1.25	1.75	1.5	3.75	3.5	3	2	2.5	1.75	1.75	3.75	1.25	4	3	3.25	2	3.5	2	0.5	0.5	0.25	0.25	0	0.5	0.25	0	0	0.25	0.25	0.5	0.25	0.25	0.75	0.25	1.25	0.75	0	0.25	0.25
	5	1	0.2	2.48647			5	2.5	3.25	2	3.5	1.5	1.5	1.5	2.5	1.75	3	1.75	2	2.25	1.75	1.25	2.25	2.75	2.5	1.25	4.25	2.25	0	0.25	0	0	0	0.25	0	0.25	0	0.25	0.25	0.5	0.25	0	0.25	0.25	0.25	0.5	0	0.5	0
	6	1	0.2	2.48647			6	4.5	5.25	6	6	7	4.25	5.25	5.5	4.5	7	7	4	6	6	5	5.75	5	7.25	4.25	8.25	2.75	0	0	0	0	0	0	0	0.25	0	0	0.5	0.5	0.5	0.25	1	0.25	0.75	0.75	0.25	0.25	0
	7	1	0.1	2.92641			7	6.5	6.25	5	5	2.5	1.5	4.5	3.5	3	3.75	4.25	3.75	7.75	6.5	2.5	3	2.75	5.25	3.25	3.75	2	0	0	0	0.25	0	0.25	0.5	0.5	0.5	0	0.75	3.25	0.25	0	0.5	0.25	0.5	1	0	0	0.5
	8	1	0	3.28971			8	5.75	7.25	6	7.75	6	3.75	7	8	6.25	7.25	7.25	4	8	4.75	4.25	5.75	5.75	8	5	9.25	4.5	0.25	0.25	0.25	0.25	0	0.5	0	1.25	0.75	0.25	0.25	1.25	1	0.5	2	0.5	1	1.25	0	0.75	0.25
	9	1	0	3.28971			9	12	14.25	8.5	10	10	5	10	8.25	9	9.5	9.25	8.25	10.75	12.5	8.25	8.5	7	11.25	7.75	8.75	4.75	1.25	1.25	0.75	0.5	0.75	1	0	0	0.25	0	0.5	1	1.5	0.5	1.25	0.5	0.5	1	0.5	1	0.25
	10	1	0.1	2.92641			10	7	10.75	7.5	9.5	9	5	9	9	7.75	7.75	8.25	6.25	10.5	9.5	7.25	6.5	6	9.75	6	6	4	0.25	1.5	0.25	0.5	0.25	0.75	0	0.25	0.5	0	0.5	1	2	0	0.75	0.75	0.25	1.25	0.75	1.25	0.5
	11	1	0	3.28971			11	1.5	4.75	3.75	2.5	2.5	2.25	2.5	3.5	3.5	4.5	4	2	3.75	3.5	2.25	2.75	3.25	3.75	4	3.5	2.25	0.25	1	0.25	0	0	0	0	0	0.25	0.25	0.25	1	0.75	0.25	1.5	0.75	1.25	0.75	0.5	0	0.25
	12	1	0	3.23807			12	0.5	1.75	2.25	0.75	0.75	2.25	1	1.75	0.5	1.75	1.75	0.5	1	1.25	1	0.5	2.5	2	1	2	1.5	0.25	0.25	0	0	0.25	0	0	0	0	0.25	0	0.75	0.25	0	0.75	0.25	0.25	0.5	0.5	0.25	0
							13	3.5	1.75	1.75	1.25	1.5	2.25	2	1.75	1	2.25	1.75	1	3.75	1.25	1	1.5	3.25	2	1.25	0.75	2	0	0	0	0	0.25	0	0.25	0	0	0	0	0.5	0.25	0	0.25	0	0	0	0	0.25	0
							14	2.5	5.5	1.75	1	1	2	1.5	2.5	1.5	1.75	2	1.5	2.25	2.75	2	1.5	2.25	2.5	3.25	2.25	2	0	0.25	0	0	0.25	0.5	0.5	0	0.25	0.25	0	0.5	0.75	0	0	0	0.75	0	0	0	0
							15	2.5	5	3.5	2.75	2	2.75	4	4	2.75	1.5	3.5	3.75	3	6.75	2.5	3.75	3.5	4.75	2.5	4.25	3.25	1	1.25	0.5	0.25	0	0	0.25	0	0	0.5	0.25	0.25	0.5	0.5	1	0.75	1.75	0	0.25	0.5	0.5
							16	6.5	11	9.25	4	5.75	5.25	7.75	4.25	3.75	5.75	5.75	4.25	5	8.25	5.25	6.75	7.5	5.25	6.5	7.5	7.25	1.75	0.75	0.75	0.5	0.25	1	0.25	0.25	0	0.5	0.25	1	2.25	0.5	1.25	0.75	2.25	0.75	0.5	1.25	0.5
							17	1.75	2.5	0.75	0.75	0.75	1	1.25	0.75	1	1.25	1	0.5	0.25	0.5	0.25	0.5	0.75	1.75	0.5	0.75	1	0.25	0	0.5	0	0	0	0	0	0	0.25	0	0.5	0.25	0.25	0	0	0	0.25	0	0.5	0
							18	1.75	4.25	3	1.25	1.25	1.25	3.75	1.25	2	1.5	2	2.75	2	3.25	1	3	2.25	3	2	2.75	2.75	1	0.75	0.5	0.5	0.25	0.25	0.25	0	0.25	0.5	0	0.25	0	0.25	0.75	0.5	1	0.75	0.25	1	0.25
							19	2	2	1.5	1.75	2.25	2.25	2	3	4.25	2.75	0.75	3	1.5	0.75	0.75	1.25	1.25	1.5	1.5	2	0.5	0.75	1.5	1.5	2.25	0.75	2.25	1.5	3.25	1	1.5	2.5	1.25	1.75	2	1.5	2.5	1.5	1.5	2.25	1.25	2.25
							20	3.25	2.75	1.25	1.75	2.25	2.25	3.25	2.25	1.75	1.25	2.75	3	2.5	2	2.25	4	1.75	2.75	2.75	2	0.75	1	1.25	1.5	1.75	0.75	0.5	0.75	0.75	0.75	0.75	0.5	1.25	0.5	0.25	0.25	0.25	0	1.25	0	0	0.5
[truncated: 85 more columns]

## Sheet: Figure 2
	Figure 2c										Figure 2d									Figure 2e									Figure 2f					Figure 2g
	CPD										Example OFC neuron									Example OFC neuron									Example OFC neuron					Firing rate for Go stimulus (spike/s) when d'=0.033
	Unit #	MD-Cue	MD-Outcome	MD-Lick		OFC-Cue	OFC-Outcome	OFC-Lick			d'	β of pref cue	Linefit of pref cue	β of nonpref cue	Linefit of nonpref cue	Cue SI	Linefit of cue SI			d'	β of FA	Linefit of FA	β of Hit	Linefit of Hit	Outcome SI	Linefit of outcome SI			d'	β of lick rate	Linefit of lick rate			Time from cue onset (ms) Trial #	-900	-800	-700	-600	-500	-400	-300	-200	-100	0	100	200	300	400	500
	1	0.00783404	0.0266736	0.0784348		0.0087666	0.0139141	0.000849813			0.0330677	0.85639	0.682627	1.23195	0.695113	-0.394631	-0.0131202			0.0330677	1.82782	2.20977	1.06343	1.34739	0.777005	0.876615			0.0330677	0.371738	0.231342			1	0	0	0	0	0	0	0	0	0	0	0	0	10	10	10
	2	0.0108027	0.00572708	0.0069982		0.102545	0.0309472	0.00508494			-0.0662694	0.430055	0.648036	0.60117	0.704511	-0.179806	-0.0593436			-0.0662694	1.99638	2.27918	1.43705	1.37023	0.568564	0.923954			-0.0662694	0.119542	0.225244			2	0	0	0	10	0	10	10	10	0	0	0	0	10	0	0
	3	0.00605121	0.012659	0.0211023		0.0157374	0.0145275	0.000914371			1.01676	0.887246	1.02516	0.383179	0.602043	0.529669	0.44461			1.01676	1.70384	1.52244	1.34069	1.12122	0.369139	0.407845			1.01676	0.142795	0.291727			3	0	0	0	0	10	0	0	0	0	0	0	0	10	0	0
	4	0.00570628	0.067924	0.0424111		0.202183	0.0268226	0.0117118			1.69529	1.37745	1.26144	0.449747	0.537845	0.974821	0.760343			1.69529	1.46133	1.04834	1.11688	0.965213	0.35014	0.0844956			1.69529	0.348626	0.333379			4	0	0	0	0	10	0	0	0	0	0	0	0	0	0	0
	5	0.00335007	0.0111524	0.0059171		0.0071972	0.0135755	0.00501047			1.90278	1.55116	1.33369	0.275915	0.518214	1.34002	0.856892			1.90278	1.26744	0.903358	0.912531	0.917507	0.360764	-0.014382			1.90278	0.46343	0.346115			5	0	10	0	0	0	0	0	0	10	0	0	0	10	0	0
	6	0.00287754	0.0067731	0.00769251		0.0152627	0.0113602	0.00196004			2.50063	1.46817	1.54187	-0.0549276	0.461649	1.60046	1.13508			2.50063	1.01555	0.485626	0.953038	0.780049	0.0635476	-0.299283			2.50063	0.374383	0.382815			6	0	0	0	0	0	0	0	0	0	0	0	0	0	0	0
	7	0.00245932	0.0102781	0.0257		0.00409615	0.0622904	0.00473642			3.04821	1.60122	1.73254	0.558831	0.409841	1.09533	1.38988			3.04821	0.120718	0.10302	0.630308	0.654149	-0.518001	-0.560227			3.04821	0.341957	0.416428			7	0	0	0	0	0	0	0	10	30	0	10	0	0	20	20
	8	0.00925432	0.0106384	0.00221499		0.00931311	0.0108537	0.000560562			3.22874	1.89851	1.7954	0.723972	0.392761	1.23419	1.47388			3.22874	-0.398645	-0.0231195	0.102394	0.612642	-0.50931	-0.646257			3.22874	0.545904	0.42751			8	0	0	0	0	0	0	0	0	0	0	0	0	0	0	0
	9	0.0261562	0.0201221	0.00317904		0.0925093	0.0782386	0.00157204			3.45882	2.02213	1.87552	0.377577	0.370992	1.72809	1.58095			3.45882	-0.247742	-0.183885	0.491146	0.559741	-0.751085	-0.755902			3.45882	0.553694	0.441634			9	0	0	0	0	0	0	0	0	0	0	0	0	0	0	0
	10	0.0117748	0.00980752	0.00763193		0.0722417	0.0252916	0.0115831			3.80443	1.79982	1.99587	0.483851	0.338292	1.38281	1.74177			3.80443	-0.827328	-0.425375	0.760958	0.480277	-1.6145	-0.920602			3.80443	0.296974	0.46285			10	0	10	0	0	0	0	0	0	0	0	0	0	0	0	0
	11	0.0455062	0.0142012	0.0158748		0.00985338	0.0123094	0.00754329																										11	0	0	0	0	0	10	0	0	0	0	0	0	0	0	0
	12	0.0541561	0.0211549	0.00672946		0.0170385	0.0062542	0.00202003																										12	0	0	0	0	0	0	0	0	0	0	0	0	0	0	0
	13	0.0332558	0.00988252	0.041643		0.00925321	0.0076532	0.00210522																										13	0	0	0	0	0	0	0	0	0	0	10	0	0	0	0
	14	0.0188173	0.0468003	0.0983174		0.0043164	0.0148426	0.00589617																										14	0	0	0	0	0	0	0	0	0	0	0	0	0	0	0
	15	0.00668333	0.0134384	0.0508885		0.0122009	0.0324356	0.0224722																										15	0	0	0	0	0	0	0	0	0	0	0	0	0	0	0
	16	0.0169871	0.0331152	0.00225271		0.0193625	0.00644491	0.025792																										16	0	0	0	0	0	0	0	0	0	0	10	20	0	0	0
	17	0.00606111	0.0460028	0.140519		0.00984566	0.0151905	0.0001668																										17	0	0	20	0	0	0	0	0	0	0	0	0	0	0	0
	18	0.0154722	0.00532461	0.0039151		0.0173904	0.00954403	0.00618725																										18	0	0	10	0	0	0	0	0	0	0	0	10	10	0	0
	19	0.0102973	0.00510323	0.0139243		0.00484065	0.0139496	0.00824877																										19	0	0	0	0	0	0	0	0	0	0	0	0	0	0	0
	20	0.015427	0.0105491	0.00303305		0.109233	0.0118724	1.16308e-05																										20	0	0	0	0	0	0	0	0	0	0	0	0	0	0	0
	21	0.0345068	0.0455929	0.127379		0.0213291	0.0144519	0.018017																										21	0	0	0	0	0	0	0	0	0	0	0	0	0	0	0
	22	0.00345999	0.00870267	0.0137641		0.00579292	0.0100305	0.00877302																										22	0	10	0	0	0	0	0	0	0	0	0	0	0	0	0
	23	0.0150428	0.0183965	0.00413019		0.00388628	0.00892485	0.00762171																										23	0	0	0	0	0	0	0	0	0	0	0	0	0	0	0
	24	0.0157085	0.00435187	0.0252935		0.0121918	0.0140939	0.00812968																										24	0	0	0	0	0	0	0	0	0	0	0	0	0	0	0
	25	0.00132792	0.00419635	0.0369808		0.052284	0.0563696	0.00292257																										25	0	0	0	0	0	0	0	10	0	10	0	0	0	0	0
	26	0.0448557	0.0117146	0.0455383		0.0123556	0.0261203	0.00341211																										26	0	0	0	0	0	10	0	0	0	0	0	0	0	0	0
	27	0.0150002	0.0213447	0.0384429		0.037514	0.0400359	0.0116036
	28	0.00555582	0.0146744	0.00395242		0.0211557	0.0279703	0.010681																										Firing rate for No-Go stimulus (spike/s) when d'=0.033
	29	0.00343068	0.00540717	0.00314777		0.00862524	0.0150954	-0.000516529																										Time from cue onset (ms) Trial #	-900	-800	-700	-600	-500	-400	-300	-200	-100	0	100	200	300	400	500
	30	0.0878928	0.0124894	0.0368654		0.0366414	0.03766	0.0377947																										1	0	0	0	0	0	10	0	0	0	0	0	10	0	0	10
	31	0.0061329	0.00293134	0.00795248		0.00487597	0.0160217	0.00282381																										2	0	0	0	0	0	0	0	0	0	0	0	0	0	0	0
	32	0.0574332	0.0198442	0.00153046		0.0884822	0.0813982	0.148723																										3	0	0	0	0	0	0	0	0	0	0	0	0	0	0	0
	33	0.0225902	0.0125706	0.00329159		0.0847292	0.0879007	0.0693965																										4	0	0	0	0	0	0	0	0	0	0	0	0	10	0	0
	34	0.0167241	0.0152392	0.00455725		0.187545	0.128494	0.0725631																										5	0	0	0	10	0	0	0	10	0	0	0	0	0	0	0
	35	0.00400408	0.0176721	0.0227777		0.0849782	0.0150483	0.0294878																										6	0	0	0	0	0	0	0	0	0	0	0	0	10	0	0
	36	0.0111859	0.0217557	0.0327533		0.0526695	0.0206786	0.00913459																										7	0	0	0	0	0	0	0	0	0	0	0	0	10	0	0
	37	0.0126685	0.0181721	0.038176		0.0518012	0.0149066	0.00545359																										8	0	0	0	0	0	0	0	0	0	0	10	0	0	0	0
	38	0.0022064	0.00386453	0.00463697		0.0996514	0.03398	-7.0579e-05																										9	0	0	0	0	0	10	0	0	0	0	0	10	0	0	0
	39	0.00571238	0.0513373	0.0437441		0.0364791	0.0411086	0.000308438																										10	0	0	0	10	0	0	0	0	0	0	0	10	0	0	0
	40	0.0564899	0.0404225	0.0163969		0.129238	0.0214866	0.00173473																										11	0	0	0	0	0	0	0	0	0	0	0	0	0	0	0
	41	0.0197914	0.0154207	0.00131082		0.211962	0.153601	0.0729802																										12	0	0	0	0	0	10	0	0	0	0	0	0	10	0	0
	42	0.0099137	0.0454905	0.000510863		0.00622231	0.00232663	0.00334952																										13	0	10	0	0	0	0	0	0	0	0	0	0	0	0	0
	43	0.00864829	0.00853378	0.00123632		0.00536744	0.00815122	0.0701974																										14	0	0	0	0	0	0	0	0	10	0	10	0	0	0	0
	44	0.0281884	0.00751084	0.00679703		0.00464899	0.00352786	0.00772169																										15	0	0	0	0	0	0	0	0	0	10	0	0	10	0	0
	45	0.0552861	0.00448262	0.00291832		0.0662315	0.00602067	0.00379837																										16	0	10	0	0	0	0	0	10	0	0	0	0	0	0	0
	46	0.0126561	0.021987	0.0137284		0.0915368	0.0372349	0.0305623																										17	0	0	0	0	0	0	0	0	0	0	0	0	0	0	0
	47	0.020995	0.0166243	0.00232545		0.0644139	0.00525624	0.00733638																										18	0	0	0	0	10	0	0	0	0	0	0	0	0	0	0
	48	0.0446334	0.0222262	0.00751784		0.00954893	0.0166024	0.00392882																										19	0	0	10	10	10	0	0	0	0	0	0	0	0	0	0
	49	0.008655	0.0108938	0.0158757		0.0439288	0.00358581	0.00280021																										20	0	0	0	0	0	0	0	0	0	0	0	0	0	0	0
	50	0.024147	0.00791883	0.000852925		0.0360205	0.00980891	0.00462385																										21	0	0	0	0	0	0	10	0	0	0	0	10	0	0	0
	51	0.0170385	0.0107236	0.0115393		0.0167595	0.0146802	0.00277659																										22	0	0	0	0	0	0	0	0	0	0	0	0	0	10	0
	52	0.0178189	0.00423294	0.00601496		0.0453832	0.0621746	0.00768646																										23	0	0	10	0	0	0	10	0	0	0	0	0	20	0	0
	53	0.0343519	0.0237111	0.0106614		0.215369	0.0230974	0.000705259																										24	0	0	0	0	0	0	0	0	0	0	0	0	0	10	0
	54	0.047724	0.0130711	0.00278682		0.0217245	0.0214522	0.00629345
	55	0.0295989	0.0234548	0.00668611		0.0110838	0.0156252	0.013701																										Firing rate for Go stimulus (spike/s) when d'=1
	56	0.0111039	0.0112059	0.00201367		0.168309	0.0129512	0.00134214																										Time from cue onset (ms) Trial #	-900	-800	-700	-600	-500	-400	-300	-200	-100	0	100	200	300	400	500
	57	0.0103841	0.00916091	0.00536926		0.131948	0.00376026	0.00229104																										1	0	0	10	0	0	0	0	0	0	0	0	0	10	0	0
	58	0.0284059	0.00467471	0.00235566		0.0290348	0.0211417	0.00306523																										2	0	0	0	0	0	0	0	0	10	10	0	0	0	0	0
	59	0.0502632	0.0150874	0.00158156		0.00698611	0.0852055	-0.00292387																										3	0	0	0	0	0	0	0	0	20	0	0	0	0	0	0
	60	0.0195669	0.00802262	0.00307844		0.035295	0.0168268	0.00467917																										4	0	0	0	0	0	0	0	0	0	0	0	10	10	0	0
	61	0.0746779	0.00956036	0.0114716		0.00354643	0.00324936	0.00638437																										5	0	0	0	0	0	0	0	0	0	0	0	0	0	0	0
	62	0.0624518	0.0082588	0.0048394		0.202465	0.00417674	0.0036543																										6	0	0	0	0	0	0	0	0	0	0	0	0	0	0	0
	63	0.0256021	0.0183555	0.00877772		0.0085259	0.00916469	0.0273755																										7	0	0	10	0	0	10	0	10	0	0	0	0	0	0	0
	64	0.032437	0.0362809	0.00828972		0.0152257	0.0147895	0.00575625																										8	0	0	0	0	0	0	0	0	10	0	0	0	0	0	0
	65	0.0420188	0.0205757	0.00211153		0.03006	0.0200793	0.00132408																										9	0	0	0	0	0	0	0	0	0	0	0	0	10	0	0
	66	0.140374	0.0266914	0.0142607		0.385466	0.0193781	-0.00460129																										10	0	0	0	0	0	10	0	0	0	0	0	0	0	10	0
	67	0.00607648	0.010673	0.00272227		0.0195106	0.00178876	0.033598																										11	0	0	0	10	0	0	0	0	0	0	0	0	0	0	0
	68	0.00900394	0.00517317	0.00389644		0.0024377	0.0451447	0.00226759																										12	0	0	0	0	10	0	0	0	0	0	0	0	0	0	0
	69	0.00720632	0.00513623	0.0315925		0.0323588	0.00743176	0.0112132																										13	0	0	0	0	0	0	0	0	0	0	0	0	0	0	0
	70	0.0152945	0.0105749	0.00144992		0.00226285	0.00854174	0.0300305																										14	0	0	0	0	0	0	0	0	0	0	0	0	0	0	0
	71	0.00715164	0.00467162	0.00354525		0.0223939	0.00908664	0.00244924																										15	10	0	20	0	0	0	0	0	0	0	0	0	0	0	0
	72	0.0137247	0.0174296	0.00590113		0.189579	0.0886831	0.0123424																										16	0	0	0	0	0	10	0	0	0	0	0	0	0	0	0
	73	0.0150365	0.0243193	0.0046222		0.060428	0.0216077	0.00427103																										17	0	0	0	0	0	0	0	10	10	0	0	0	0	0	0
	74	0.0307971	0.00891171	0.00575423		0.00257615	0.0298971	0.0277499																										18	0	0	0	0	0	0	0	0	0	0	0	10	0	0	0
	75	0.0439374	0.0165911	0.00167337		0.0148905	0.0266759	0.0265234																										19	0	0	10	0	0	0	0	0	10	0	0	0	0	0	0
	76	0.00838222	0.00890205	0.0488114		0.0404607	0.0358565	0.0157861																										20	0	0	0	0	0	0	0	0	0	0	0	0	0	0	0
	77	0.00273144	0.0174807	0.011377		0.0345025	0.0400295	0.0171953																										21	0	0	10	0	0	0	0	0	10	0	0	0	0	0	0
	78	0.0204532	0.00734456	0.0425366		0.219497	0.171199	0.067072																										22	10	0	10	0	0	0	0	0	0	0	10	0	10	0	0
	79	0.012992	0.0062103	0.0178888		0.07445	0.0519637	0.0251547																										23	0	0	0	0	0	0	0	0	10	0	0	0	0	0	0
	80	0.0584408	0.0243427	0.00204316		0.0512684	0.0151026	0.00383537																										24	0	0	0	0	0	0	0	10	0	0	0	0	0	0	0
	81	0.0127578	0.00760766	0.046614		0.00952915	0.0171875	0.0088156
	82	0.0378317	0.0154932	0.0302201		0.25386	0.0196103	0.00386052																										Firing rate for No-Go stimulus (spike/s) when d'=1
	83	0.028138	0.0198692	0.00548844		0.00756014	0.00878177	0.00360816																										Time from cue onset (ms) Trial #	-900	-800	-700	-600	-500	-400	-300	-200	-100	0	100	200	300	400	500
	84	0.0291578	0.0139084	0.0778093		0.177284	0.0939019	0.0289145																										1	0	0	0	20	0	10	0	0	0	0	0	0	20	0	0
	85	0.00533745	0.0115632	0.0236644		0.0457976	0.00945698	0.0464975																										2	0	10	0	0	0	10	10	0	0	0	0	0	0	0	0
	86	0.0305746	0.0216102	0.012568		-0.00416941	0.0105018	0.16405																										3	0	0	0	0	0	0	0	10	0	0	0	0	0	0	0
	87	0.0419872	0.0530201	0.0138038		0.0110227	0.00601051	0.163206																										4	0	0	0	0	0	0	0	0	0	0	10	0	0	0	0
	88	0.012889	0.0360426	0.0553834		0.105355	0.0142624	0.0404156																										5	0	0	0	0	10	0	0	10	0	10	0	0	0	0	0
	89	0.0100107	0.00501652	0.0124782		0.090284	0.00969289	-0.011788																										6	0	0	0	0	0	0	0	0	10	10	0	10	0	0	0
	90	0.0476956	0.0287014	0.0482245		0.0753462	0.351889	0.00451703																										7	0	0	0	10	0	10	10	0	0	0	0	0	0	0	0
	91	0.00221983	0.0146504	0.00310197		0.116195	0.0072867	0.000464792																										8	0	0	0	0	0	10	0	10	0	0	0	0	0	0	10
	92	0.0509853	0.00636301	0.00358052		0.0536775	0.0258665	0.000920506																										9	0	0	0	0	0	0	0	0	0	0	0	0	0	0	0
	93	0.0792678	0.0329079	0.0164568		0.0155789	0.00543977	0.00977048																										10	0	10	0	0	0	0	0	0	0	0	0	0	0	0	0
	94	0.0147558	0.0126381	0.00107057		0.0839619	0.00700192	0.021848																										11	0	10	0	0	0	10	0	0	0	0	0	0	0	0	0
	95	0.0150349	0.0465914	0.068049		0.218466	0.0429751	0.0209155																										12	0	0	0	0	10	0	0	0	0	0	0	0	0	0	0
	96	0.0471177	0.0088694	0.0165876		0.0202063	0.0850806	0.0131174																										13	10	10	10	10	0	0	0	0	0	0	0	0	0	0	0
	97	0.0149984	0.0149183	0.0122461		0.0936408	0.00523367	0.00699569																										14	0	0	0	0	0	0	0	0	0	0	10	0	0	0	0
	98	0.0127403	0.00656226	0.00612639		0.0423258	0.0788368	0.0307758																										15	0	0	0	0	0	0	0	0	0	10	0	0	10	0	0
	99	0.034943	0.0149834	0.00565335		0.037779	0.0678201	0.0209324																										16	0	0	0	0	0	0	0	0	0	0	0	10	0	0	0
	100	0.0089239	0.00773207	0.0293357		0.00441486	0.0341972	0.00508234																										17	0	0	0	0	0	0	0	0	0	0	0	10	0	0	0
	101	0.00922847	0.0225033	0.00721317		0.250874	0.212208	0.00824023																										18	0	0	0	0	0	0	0	0	0	0	0	0	0	0	0
	102	0.0325692	0.0103635	0.00345312		0.0305985	0.0509491	0.0088279																										19	0	0	0	0	0	0	0	0	10	0	0	0	0	0	0
	103	0.0598306	0.0197338	0.00850579		0.00437488	0.00470402	0.00469535																										20	0	0	0	0	0	0	0	0	0	0	0	0	0	0	0
	104	0.0693054	0.0305203	0.00691247		0.0663147	0.0276532	0.00128701																										21	0	0	10	0	0	0	0	0	0	10	10	0	0	0	0
	105	0.0192411	0.0199765	0.00118149		0.310857	0.0913185	0.0074479																										22	0	0	0	0	0	0	0	10	0	0	0	0	0	0	0
	106	0.0217796	0.016553	0.0388559		0.0673751	0.113493	-0.00197578																										23	0	0	0	0	0	0	0	10	0	0	0	0	0	0	0
	107	0.0397689	0.0070593	0.00761638		0.0281905	0.00789737	0.00295238																										24	0	0	0	0	0	10	0	0	0	0	10	0	0	0	0
	108	0.0233707	0.00463989	0.00168708		0.00719432	0.00444937	0.00083556																										25	20	0	0	0	0	0	0	0	0	0	0	0	0	10	0
	109	0.0731614	0.0364291	0.0194581		0.0952121	0.0293042	0.0128768																										26	0	10	0	0	0	0	0	0	0	0	0	0	0	0	20
	110	0.00689737	0.0118256	0.0184265		0.0153867	0.0241794	0.002178
	111	0.0475304	0.0256696	0.0181825		0.00835484	0.0109506	0.00864083																										Firing rate for Go stimulus (spike/s) when d'=1.9
	112	0.0129616	0.0353177	0.0512605		0.0425468	0.013907	0.0043949																										Time from cue onset (ms) Trial #	-900	-800	-700	-600	-500	-400	-300	-200	-100	0	100	200	300	400	500
	113	0.0196216	0.0242478	0.0304496		0.0573021	0.0483905	0.00154803																										1	0	0	0	0	0	0	0	0	0	0	0	0	0	0	0
	114	0.181418	0.0478963	0.0235404		0.0388122	0.010446	0.0102023																										2	0	0	0	0	0	0	0	0	0	0	0	0	20	0	0
	115	0.0314378	0.0491216	0.0108816		0.026991	0.00668538	0.00466637																										3	0	0	10	0	0	0	0	10	0	0	0	0	0	0	0
	116	0.09889	0.0204895	0.00328303		0.0297749	0.00686277	0.00319487																										4	0	0	0	0	0	0	0	0	0	0	0	10	0	0	0
	117	0.0541617	0.00900429	0.0147604		0.128132	0.0464567	0.00152028																										5	0	0	0	0	0	0	0	0	0	0	0	0	0	10	0
	118	0.0931178	0.0144094	0.00232903		0.0265068	0.01222	0.000851825																										6	0	0	0	0	0	0	0	0	0	0	0	0	0	0	0
	119	0.0470831	0.00542102	0.0243231		0.106486	0.0156222	0.00326149																										7	0	10	0	0	0	0	0	0	0	0	0	0	0	0	0
	120	0.0125778	0.00620116	0.0270762		0.0102868	0.00758089	0.00126459																										8	0	0	0	0	0	0	0	0	0	0	0	0	10	0	0
	121	0.0162588	0.0141162	0.00278554		0.00212968	0.00259628	0.00732541																										9	0	0	0	0	0	0	0	0	0	0	0	0	0	0	0
	122	0.159881	0.00209601	0.00919894		0.0597511	0.020382	0.0022489																										10	0	0	0	0	0	0	0	0	0	0	0	0	0	0	0
	123	0.0319656	0.020274	0.0060918		0.0847705	0.0293037	0.00144106																										11	0	0	0	0	0	0	10	0	0	0	10	0	0	0	0
	124	0.0338589	0.0608688	0.00451144		0.0282068	0.00808249	0.014479																										12	0	0	0	0	10	0	0	0	0	0	0	0	10	0	10
	125	0.225188	0.0428977	-0.00605458		0.00340966	0.00555982	0.0133328																										13	0	0	0	0	0	0	0	0	0	0	0	0	0	0	0
	126	0.0273428	0.0138877	0.00199991		0.0976374	0.141388	0.0175345																										14	0	0	0	0	0	0	0	0	0	0	0	0	0	0	0
	127	0.241138	0.030839	0.0168337		0.0847855	0.0347427	0.0021179																										15	0	0	0	0	0	0	0	0	0	0	0	0	0	0	0
	128	0.0675873	0.00786303	0.00118903		0.128684	0.136394	0.0953048																										16	0	0	0	0	0	0	0	0	0	0	0	0	0	0	10
	129	0.130409	0.0774956	0.017425		0.0403979	0.0756265	0.00258703																										17	0	0	0	0	10	0	0	0	0	0	0	0	0	0	0
	130	0.00145164	0.0227206	0.00104197		0.0252608	0.126198	0.0413795																										18	0	0	0	0	0	0	0	0	0	0	0	0	0	0	0
	131	0.00816397	0.0458194	0.00910405		0.00502546	0.030419	0.00320914																										19	0	0	0	0	0	10	0	0	0	0	0	0	0	0	0
	132	0.0448661	0.0249516	0.0215938		0.129564	0.0684854	0.0226809																										20	0	0	20	0	0	0	0	0	0	0	0	0	0	0	0
	133	0.112259	0.017872	0.00170796		0.00889247	0.0054573	0.00126514																										21	0	0	0	0	10	0	10	0	0	0	0	0	0	10	0
	134	0.0343704	0.018078	0.000771344		0.127559	0.0889463	0.0263408																										22	10	0	0	0	0	0	0	0	0	0	0	0	0	0	0
	135	0.112767	0.0107846	0.00128382		0.179868	0.048986	0.00590894																										23	0	0	0	0	0	0	0	0	0	0	0	0	0	0	0
	136	0.00665899	0.0276281	0.0061286		0.0134579	0.00912074	0.00318288																										24	0	0	0	0	0	0	0	0	0	0	0	0	0	0	0
	137	0.0696843	0.0142132	0.00539148		0.014531	0.0627631	0.0190285																										25	0	0	0	0	0	0	0	0	0	0	0	0	0	10	0
	138	0.147859	0.0230596	0.00580067		0.0492718	0.0032956	0.00658948
	139	0.0223692	0.0142439	0.0262301		0.258641	0.107279	0.00335685																										Firing rate for No-Go stimulus (spike/s) when d'=1.9
	140	0.011867	0.0230788	0.0176768		0.172824	0.12821	0.0134338																										Time from cue onset (ms) Trial #	-900	-800	-700	-600	-500	-400	-300	-200	-100	0	100	200	300	400	500
	141	0.0239082	0.0064562	0.00680999		0.181837	0.121708	0.0198906																										1	0	0	0	0	0	0	0	0	0	0	0	0	0	10	0
	142	0.00768164	0.00178283	0.000709223		0.0156705	0.0244558	0.0517647																										2	0	0	0	0	0	0	0	0	0	0	0	0	0	0	0
	143	0.0707986	0.0270396	0.00414569		0.0472548	0.00188446	0.00892752																										3	10	0	0	0	0	0	0	0	0	0	0	0	0	0	0
	144	0.0216054	0.00856707	0.0038866		0.177794	0.0572153	0.0035569																										4	0	0	0	0	0	10	0	0	10	0	0	0	0	0	0
	145	0.00673111	0.00459212	0.00186708		0.00147508	0.00208953	0.000752549																										5	0	0	0	0	0	0	0	0	0	0	0	0	10	0	0
	146	0.0123812	0.00867255	0.00331644		0.0191134	0.00440479	0.00200944																										6	0	0	0	0	0	0	0	0	0	0	0	0	0	0	0
	147	0.020815	0.0129996	0.00334057		0.0443636	0.00990806	0.000969317																										7	0	0	0	0	0	0	0	0	0	0	0	0	0	0	0
	148	0.00768712	0.0303104	0.001737		0.0026589	0.011504	0.00224996																										8	0	10	0	0	0	0	10	0	0	0	0	0	0	0	0
	149	0.0187543	0.0205867	0.00398095		0.0165603	0.00299434	0.00327893																										9	0	0	0	0	0	0	0	0	0	10	0	0	0	0	10
	150	0.0337525	0.0591071	0.00627455		0.0386318	0.00545001	-0.000340755																										10	0	0	0	0	0	0	0	0	0	0	0	0	0	10	0
	151	0.00501788	0.0387936	0.000962382		0.418845	0.018476	0.00360238																										11	0	0	0	0	0	0	0	0	0	0	0	0	0	0	0
	152	0.0964261	0.0611198	0.0163024		0.176326	0.0410355	0.00865786																										12	0	0	0	0	0	0	0	10	0	0	0	0	0	0	0
	153	0.0042151	0.0206526	0.00736324		0.0014283	0.00652652	0.0081531																										13	0	0	0	0	0	0	0	0	0	0	0	0	0	0	0
	154	0.0251193	0.0317362	0.00206386		0.120623	0.0425788	0.00481776																										14	0	0	0	0	0	0	0	0	0	0	0	0	0	0	0
	155	0.151972	0.11064	0.0239404		0.00137373	0.00137327	0.00940343																										15	0	0	0	0	10	0	0	0	0	0	0	0	0	10	0
	156	0.104688	0.0592219	0.00642692		0.00084891	0.00461121	0.00549832																										16	0	0	0	0	0	10	0	0	0	0	0	0	0	0	0
	157	0.0324462	0.0497855	0.0100023		0.00190214	0.0142804	0.00317174																										17	0	0	0	0	0	0	0	0	0	0	0	0	0	0	0
	158	0.0413788	0.0148162	0.00855531		0.0405844	0.00704336	0.0103757																										18	0	0	0	0	10	0	0	0	0	10	0	0	0	0	0
	159	0.0143314	0.00874378	0.00147285		0.0589775	0.0605856	-0.00355616																										19	0	0	0	0	0	0	0	0	0	0	0	0	0	0	0
	160	0.0941054	0.0613134	0.00518468		0.0514577	0.0173335	0.00421083																										20	0	0	0	0	10	0	0	0	0	0	0	0	0	0	0
	161	0.0138531	0.0196757	0.018132		0.227935	0.0468199	0.005074																										21	0	0	0	0	0	0	0	0	0	0	0	0	0	0	0
	162	0.0904114	0.042573	0.00239799		0.112468	0.0272574	0.000868824																										22	0	0	0	0	0	0	0	0	0	0	0	0	0	0	0
	163	0.0139236	0.0202117	0.0133082		0.0529687	0.0507276	0.00221401																										23	10	0	0	0	0	0	0	0	0	0	0	0	0	0	0
	164	0.0585199	0.0702495	0.0237151		0.213846	0.0273998	0.00348001																										24	0	0	0	0	0	0	0	0	0	0	0	0	0	0	10
	165	0.221578	0.12726	0.00690387		0.00817268	0.00321685	0.00118537																										25	0	0	0	0	0	0	0	0	0	0	0	0	0	0	0
	166	0.0534745	0.0415028	0.025079		0.00453936	0.00374651	0.0021342
	167	0.0124749	0.033388	0.00189655		0.546362	0.060244	0.00782943																										Firing rate for Go stimulus (spike/s) when d'=3
	168	0.0827829	0.0168447	0.00107611		0.131214	0.00847918	0.00253185																										Time from cue onset (ms) Trial #	-900	-800	-700	-600	-500	-400	-300	-200	-100	0	100	200	300	400	500
	169	0.0417434	0.069369	0.0101111		0.00972109	0.00948914	0.00582454																										1	0	0	0	0	0	0	0	0	0	10	0	0	0	0	0
	170	0.0121914	0.0201419	0.00454364		0.0205753	0.0102264	0.00189724																										2	0	0	0	0	0	0	0	0	0	0	0	0	0	0	0
	171	0.0240855	0.0113516	0.0209917		0.0422933	0.00652247	0.00393647																										3	0	0	10	0	0	0	0	0	0	0	0	0	0	0	0
	172	0.0701793	0.0372622	0.000374261		0.00785448	0.00444205	0.00347572																										4	0	0	0	0	0	0	0	0	0	0	0	0	0	0	0
	173	0.0959315	0.113444	0.0047801		0.028976	0.0047911	0.000227197																										5	0	0	0	0	10	0	0	0	0	0	0	0	0	0	0
	174	0.0523719	0.0270032	0.0177388		0.0124517	0.0646356	0.0186785																										6	0	0	10	0	10	0	0	0	0	0	0	0	0	0	0
	175	0.00968102	0.0180815	0.00320528		0.196952	0.0356357	0.0081294																										7	0	0	0	0	0	0	0	0	0	0	0	0	0	0	10
	176	0.0125565	0.0197645	0.00299464		0.0317021	0.0392789	0.0115475																										8	0	0	0	0	0	0	0	0	0	0	0	0	0	0	0
	177	0.167762	0.134966	0.00510038		0.0239404	0.00102626	0.00247282																										9	0	0	0	0	0	0	0	0	0	0	0	0	0	0	0
	178	0.0160921	0.0106152	0.00311294		0.297568	0.0899809	0.0103446																										10	0	0	0	0	0	0	0	0	0	0	0	0	0	0	0
	179	0.0326252	0.00895773	0.0108392		0.0796969	0.0155112	0.000671902																										11	0	0	0	0	10	0	10	10	10	0	20	0	0	20	0
	180	0.0149598	0.0196497	0.00101198		0.0641004	0.0213492	0.00582652																										12	0	0	0	0	0	0	0	0	0	0	0	0	0	0	0
	181	0.0192333	0.0607477	0.00243392		0.179025	0.00655855	0.000571204																										13	0	0	10	0	0	0	0	0	0	0	0	0	0	0	0
	182	0.00966437	0.0212003	0.0575296		0.0391554	0.00562562	0.00318551																										14	0	0	0	0	0	0	0	0	0	0	0	0	0	0	0
	183	0.0673673	0.0207998	-0.00109735		0.168742	0.0281012	0.00904238																										15	0	0	10	0	0	0	0	0	0	10	10	0	0	0	0
	184	0.121134	0.0639876	0.00198876		0.0210672	0.0306159	0.00137428																										16	0	0	0	0	0	0	0	0	0	0	0	0	0	0	0
	185	0.0123433	0.0160655	0.00284742		0.380674	0.0704921	-0.00116279																										17	0	0	0	0	0	0	0	0	10	0	0	0	0	0	0
	186	0.0198431	0.0229614	0.00380815		0.0349668	0.00122966	0.0113512																										18	10	0	0	0	0	0	0	0	0	0	0	0	0	0	0
	187	0.0423796	0.0113817	0.004574		0.222366	0.0010107	0.0435883																										19	0	0	0	0	0	0	0	0	0	0	0	0	0	0	0
	188	0.00774057	0.00283863	0.0049469		0.0061349	0.0204066	0.0122735																										20	0	0	0	0	0	0	0	0	0	0	0	0	0	0	0
	189	0.0201483	0.0138381	0.00550869		0.0661766	0.0145612	0.0164931																										21	0	0	0	0	0	0	0	0	0	0	0	0	0	0	0
	190	0.0623884	0.0144209	0.00672905		0.204437	0.0225205	0.0322552																										22	0	0	0	0	0	0	0	0	0	0	0	0	0	0	0
	191	0.0528199	0.053648	0.00415717		0.0051186	0.0130274	0.00349256																										23	0	0	0	0	0	0	0	0	0	0	0	0	0	0	0
	192	0.0823978	0.0254504	0.00186797		0.040569	0.00641517	0.00555032																										24	0	0	0	0	0	0	0	0	0	0	0	0	0	0	0
	193	0.144479	0.0459317	0.000827168		0.130061	0.0072776	0.00418283																										25	0	0	10	0	0	0	0	0	0	0	0	0	0	0	0
	194	0.00591177	0.0164515	0.00286066		0.0134848	0.0598276	0.000513517
	195	0.018409	0.0142111	0.00224464		0.0149759	0.026933	0.0358773																										Firing rate for No-Go stimulus (spike/s) when d'=3
	196	0.0116669	0.015998	0.00411659		0.295415	0.0811754	0.0244321																										Time from cue onset (ms) Trial #	-900	-800	-700	-600	-500	-400	-300	-200	-100	0	100	200	300	400	500
	197	0.0850818	0.0520151	0.00165824		0.0476958	0.0056483	0.0255534																										1	0	0	0	10	0	0	0	0	0	0	0	0	0	0	0
	198	0.00334866	0.00157489	0.00701405		0.0332981	0.0117149	0.00240862																										2	0	0	0	0	0	0	0	0	0	10	0	0	0	0	0
	199	0.112587	0.0462156	0.00150531		0.141197	0.0113975	0.0252899																										3	0	0	0	0	0	0	0	0	0	0	0	0	10	0	0
	200	0.0902031	0.0778582	0.0109101		0.0174276	0.0139197	0.00839288																										4	10	0	0	10	0	0	0	0	0	0	0	0	0	0	0
	201	0.0322457	0.0307139	0.00429957		0.00145902	0.00402818	0.000721341																										5	0	0	0	0	0	0	0	0	0	0	0	0	0	0	0
	202	0.116294	0.0356679	0.00562198		0.399827	0.111973	-0.0319683																										6	0	0	10	10	0	0	10	0	0	0	0	0	0	0	0
	203	0.0197332	0.0107028	0.00564859		0.04802	0.112231	0.00139645																										7	0	0	0	0	0	0	0	0	0	0	0	0	0	0	0
	204	0.00679374	0.0170532	0.00149437		0.0129543	0.0143941	0.00744078																										8	0	0	0	0	0	0	0	10	0	0	0	0	0	0	0
	205	0.0100948	0.0190668	0.00137492		0.0844685	0.0507897	0.00295496																										9	0	0	0	0	0	0	0	0	0	0	0	0	0	0	0
	206	0.0179981	0.071942	0.00418781		0.00435065	0.00329925	0.00160746																										10	0	0	0	0	0	0	0	0	0	0	0	0	0	0	0
	207	0.00507249	0.0099016	0.00348896		0.0130561	0.0147863	0.0031348																										11	0	0	0	0	10	0	0	0	0	0	0	0	0	0	0
	208	0.0723384	0.0282373	0.00779527		0.0535945	0.0450166	0.0185234																										12	0	0	0	0	0	0	0	0	0	0	10	0	0	0	0
	209	0.0129465	0.00728229	0.00524788		0.00801438	0.00399685	0.000825162																										13	10	0	0	0	0	0	0	0	0	0	0	0	0	0	0
	210	0.0692869	0.0313473	0.0066379		0.0811063	0.0170467	-0.00180738																										14	0	0	0	0	0	0	0	0	0	0	10	0	0	0	0
	211	0.00544444	0.00867565	0.00117661		0.069227	0.00918369	0.0139381																										15	0	0	0	0	0	0	0	0	0	0	0	0	0	0	0
	212	0.0431546	0.00826681	-0.00110096		0.00695862	0.0185344	0.00897993																										16	0	0	0	0	0	0	0	0	0	0	0	0	0	0	0
	213	0.0280294	0.00504322	0.00237651		0.00561759	0.0216693	0.0306585																										17	0	0	0	20	0	0	0	0	0	0	0	10	10	0	0
	214	0.0186832	0.00579221	0.00373034		0.00615217	0.00403834	0.00312237																										18	0	0	10	0	0	0	0	0	0	0	10	0	0	0	0
	215	0.00858821	0.06688	0.0223479		0.0657643	0.0124839	0.00218907																										19	0	0	0	0	0	0	0	0	0	0	0	0	0	0	0
	216	0.0668356	0.0492537	0.02797		0.344566	0.061384	0.00230385																										20	10	0	0	0	0	0	0	0	0	0	0	0	0	0	0
	217	0.0631816	0.028923	0.00131568		0.0343286	0.0123539	0.00460643																										21	0	0	0	0	0	0	0	0	0	0	0	0	0	0	0
	218	0.0483285	0.00167624	0.000896966		0.133178	0.00724248	0.0782929																										22	0	0	0	0	0	0	0	0	0	0	0	0	0	0	0
	219	0.162544	0.0619168	0.00482167		0.0247464	0.0313924	8.516e-05																										23	0	0	0	0	0	0	0	0	0	0	0	0	0	0	0
	220	0.0138903	0.0045207	0.0102142		0.00380719	0.0110538	0.0110953																										24	0	0	0	0	0	0	0	0	0	0	0	0	0	0	0
	221	0.0369477	0.00492625	0.00260494		0.036051	0.00637196	0.0316217																										25	0	0	0	0	0	0	0	0	0	0	0	0	0	0	0
	222	0.0146822	0.0152246	0.00665382		0.0552653	0.011768	0.000553069
	223	0.0111295	0.00663214	0.0106198		0.24576	0.000961594	0.0236535																										Firing rate for Go stimulus (spike/s) when d'=3.8
	224	0.0429783	0.0051805	0.0068728		0.131336	0.0280642	0.0425572																										Time from cue onset (ms) Trial #	-900	-800	-700	-600	-500	-400	-300	-200	-100	0	100	200	300	400	500
	225	0.0195164	0.0104753	0.0082725		0.0038727	0.0157543	0.0573079																										1	0	0	0	0	0	0	0	0	0	0	0	0	0	0	0
	226	0.0131066	0.00778907	0.0159184		0.00825437	0.00387971	0.00408246																										2	10	0	0	0	0	0	0	0	0	0	0	0	0	0	10
	227	0.0315367	0.0154896	0.00052119		0.0559498	0.035414	0.056368																										3	0	0	0	0	0	0	0	0	0	0	0	0	0	0	0
	228	0.0312189	0.0228029	0.00192659		0.0858216	0.0245082	0.0100377																										4	0	0	0	0	0	0	0	0	0	0	0	0	0	10	0
	229	0.0143891	0.0159705	0.00315701		0.0143072	0.00557837	0.0105636																										5	0	0	0	0	0	0	0	0	0	0	0	0	0	0	0
	230	0.00668098	0.0211235	0.032941		0.00232949	0.0017324	0.0255101																										6	0	0	0	0	0	0	0	0	0	0	0	0	0	0	0
	231	0.0179255	0.00635009	0.00513404		0.00967274	0.00401369	0.0108665																										7	0	0	0	0	0	0	0	0	0	0	0	0	0	0	0
	232	0.0190301	0.00391582	0.00229669		0.00185151	0.00641363	0.010132																										8	10	0	10	0	0	0	0	0	10	10	0	0	0	0	0
	233	0.0152871	0.00421547	0.00169101		0.147452	0.0284429	0.00957464																										9	0	0	0	0	0	0	10	0	0	0	10	20	0	10	0
	234	0.0290958	0.0188608	0.00644541		0.0047001	0.00521693	0.0188298																										10	0	0	0	10	10	10	0	10	0	0	10	0	10	0	0
	235	0.043586	0.00545419	0.000685401		0.0457433	0.0218785	0.0179071																										11	0	0	0	0	0	0	0	0	0	0	10	0	0	0	10
	236	0.0290532	0.00304376	0.000708825		0.32004	0.00429743	0.00848165																										12	0	0	0	0	0	0	0	0	0	0	0	0	10	0	0
	237	0.0140516	0.0138888	0.00799101		0.387373	0.00809659	0.0536698																										13	0	0	0	0	0	0	0	0	0	0	0	0	0	0	0
	238	0.0277352	0.0223139	0.0104814		0.00591093	0.00720946	0.00357218																										14	0	0	0	0	0	0	0	0	0	0	0	0	0	0	0
	239	0.0264048	0.00069808	0.00919247		0.0926841	0.0366885	0.0386634																										15	0	0	0	10	10	0	0	0	0	0	0	0	0	0	0
	240	0.0912216	0.015428	0.00235609		0.0458944	0.0132864	-0.000200448																										16	0	0	0	0	0	0	0	0	0	0	0	0	10	0	0
	241	0.00657702	0.0149469	0.00479202		0.0409084	0.010193	0.00614266																										17	0	0	0	0	0	0	0	0	0	0	0	0	0	0	10
	242	0.00534585	0.00942804	9.40481e-06		0.0814881	0.0219751	0.000438635																										18	0	0	0	0	0	0	0	0	0	0	10	0	10	0	0
	243	0.0148755	0.0408189	0.00664437		0.0209783	0.00851542	0.0827042																										19	0	0	0	0	0	0	0	0	0	0	0	0	0	0	0
	244	0.0111406	0.0160422	0.00533826		0.0119312	0.00555775	0.012486																										20	0	0	0	0	0	0	0	0	0	0	0	0	0	0	0
	245	0.0315485	0.0285513	0.000260887		0.00508605	0.00862248	0.013224																										21	0	0	0	0	0	0	0	0	0	0	0	0	0	0	0
	246	0.108838	0.00598361	0.0116118		0.0390475	0.00949883	0.000235676																										22	0	0	0	0	0	0	0	0	0	0	0	0	0	0	0
	247	0.0178983	0.0450426	-0.00334984		0.0223926	0.0108166	-0.000596894																										23	0	0	0	0	0	0	0	0	0	0	0	0	10	10	0
	248	0.0068208	0.0167643	0.0501784		0.00962338	0.0130527	0.00369775																										24	0	0	0	0	0	0	0	0	0	0	0	0	0	0	0
	249	0.0583033	0.027718	-0.00169765		0.0174927	0.0380899	0.0191185																										25	0	0	0	0	0	0	0	0	0	0	0	0	0	0	0
	250	0.0527415	0.00566773	0.0045884		0.00385256	0.0302539	0.00211533
	251	0.00488951	0.0124941	0.00357799		0.0258505	0.0191297	0.0260001																										Firing rate for No-Go stimulus (spike/s) when d'=3.8
	252	0.0354002	0.0215154	0.0168237		0.0178466	0.0131592	0.0242352																										Time from cue onset (ms) Trial #	-900	-800	-700	-600	-500	-400	-300	-200	-100	0	100	200	300	400	500
	253	0.00675134	0.00624408	0.00263025		0.200631	0.0270251	0.001997																										1	0	0	0	0	0	0	0	0	0	0	0	0	0	0	0
	254	0.0271767	0.0147776	0.00878858		0.0155427	0.0143931	0.000285359																										2	0	0	0	0	0	0	10	0	0	0	0	0	0	0	0
	255	0.170205	0.044538	0.00222271		0.00280958	0.00994007	0.00022735																										3	0	0	0	0	0	0	0	0	0	20	0	0	0	0	0
	256	0.0139877	0.00942588	-6.02365e-05		0.0156992	0.0140129	0.0123622																										4	0	0	0	0	0	0	0	0	0	0	0	0	0	0	0
	257	0.107062	0.00272958	-0.00208538		0.0167665	0.0042954	0.0104885																										5	0	0	0	10	0	0	0	0	0	0	0	0	0	0	0
	258	0.00551657	0.0266827	0.00193321		0.0887715	0.0476504	0.00657638																										6	0	0	0	0	0	0	0	0	0	0	0	0	0	0	0
	259	0.0180192	0.0148348	0.00464445		0.0290861	0.011132	0.0003335																										7	0	0	0	0	0	0	0	0	0	0	0	0	0	0	10
	260	0.0594741	0.0241125	0.00774703		0.0261111	0.00112653	0.00247645																										8	0	0	0	0	0	0	0	0	0	0	0	0	0	0	0
	261	0.0702392	0.0112905	0.0119464		0.0359081	0.0159499	1.7464e-05																										9	0	0	0	0	0	0	0	0	0	0	0	0	0	0	0
	262	0.0154392	0.0159109	0.022223		0.0583012	0.00480267	0.000603087																										10	0	0	0	0	0	0	0	0	0	0	0	0	0	0	0
	263	0.036751	0.00416465	0.0039181		0.0697008	0.0266137	0.00161599																										11	0	0	0	0	0	10	0	0	0	0	0	0	0	0	0
	264	0.0173707	0.0139216	0.00529826		0.0262805	0.0116257	0.00101291																										12	0	0	0	0	0	0	0	0	0	0	0	0	0	0	0
	265	0.01317	0.0227972	0.00160548		0.00274581	0.00437558	0.00352885																										13	0	0	0	0	0	0	0	0	0	10	0	0	10	0	0
	266	0.0412455	0.0111756	0.000568643		0.337849	0.0222061	0.00324253																										14	0	0	0	10	0	0	10	0	10	0	0	0	0	0	0
	267	0.00961154	0.00807135	0.0189713		0.000946214	0.013926	0.00796395																										15	0	0	0	0	0	0	0	0	0	10	0	0	0	0	20
	268	0.0404888	0.0265128	0.00208305		0.0641961	0.00653704	0.00337378																										16	10	0	10	0	0	0	0	0	0	0	10	0	0	0	0
	269	0.0258929	0.0236762	0.0092007		0.0121415	0.0173194	0.000869866																										17	10	0	10	0	0	0	0	0	0	0	0	0	0	0	0
	270	0.00858214	0.0266846	0.0055387		0.0946649	0.00570243	0.00803386																										18	0	0	0	0	0	0	0	0	0	0	0	0	0	0	0
	271	0.0170642	0.0112431	0.00109057		0.0122805	0.085047	0.00989813																										19	0	0	0	0	0	0	0	0	0	0	0	0	0	0	0
	272	0.00675792	0.0105442	0.00389125		0.0294251	0.00971317	0.00948012																										20	0	0	0	10	0	0	0	10	0	0	0	0	0	0	0
	273	0.00309582	0.021115	0.0145167		0.144939	0.00415519	0.000533723																										21	0	0	0	0	0	0	10	0	0	10	0	0	0	0	0
	274	0.00344256	0.0145889	0.00654918		0.0237749	0.00270927	0.000235654																										22	0	0	0	0	0	0	0	0	0	0	0	0	0	0	0
	275	0.0286138	0.00873746	0.0184053		0.0206609	0.0130686	0.0101738																										23	0	0	0	0	10	0	0	0	0	0	0	0	0	10	0
	276	0.035143	0.0306083	0.0356193		0.0636412	0.0142021	0.0170885																										24	0	0	0	0	0	0	0	0	0	0	0	0	0	0	0
	277	0.0257846	0.0081306	0.0291447		0.003189	0.0203613	0.0261718																										25	0	0	0	0	0	0	0	0	0	0	0	0	0	0	0
	278	0.0110348	0.0259343	0.0218091		0.114269	0.00532517	0.00559679
	279	0.00985812	0.00912965	0.0178254		0.0200466	0.00748724	0.004722
	280	0.0377456	0.010839	0.00307071		0.135535	0.0371154	0.0146585
	281	0.00663642	0.00830996	0.0228423		0.105957	0.0349021	0.00121902
	282	0.0109298	0.00704574	0.0245572		0.0199459	0.0154271	0.0100611
	283	0.0114692	0.00999717	0.00555058		0.0298048	0.0187163	0.00543588
	284	0.0147688	0.0203709	0.0194034		0.136914	0.0316605	0.0192371
	285	0.00749208	0.0168182	0.00386639		0.00931424	0.00541665	0.00209256
	286	0.00498521	0.0146141	0.0162786		0.0151154	0.0827734	0.00616968
	287	0.00405299	0.00561927	0.00335477		0.0753428	0.00498104	0.0307103
	288	0.00962085	0.00891949	0.00364599		0.0779177	0.10143	0.024051
	289	0.0971105	0.0333088	0.0365978		0.0750972	0.00652103	0.00784686
	290	0.00651726	0.014053	0.00396293		0.0339127	0.0444997	0.00159303
	291	0.0125653	0.00565452	0.00851239		0.00523906	0.0128524	0.026137
	292	0.00604162	0.00636831	0.000328513		0.0104969	0.0408158	0.03074
	293	0.0494119	0.0167928	0.0140362		0.00565097	0.0138309	0.00180885
	294	0.00126871	0.0128333	0.00847419		0.00447254	0.0857569	0.0142697
	295	0.0107974	0.0113442	0.00966809		0.0200275	0.0308393	0.0305137
	296	0.00835456	0.0202524	0.00243845		0.0483619	0.00884914	0.00621817
	297	0.0136131	0.00312734	0.0204068		0.0263484	0.0721156	0.00668293
	298	0.00914874	0.00839493	0.00350322		0.00479966	0.0191929	0.00291072
	299	0.0848762	0.0130333	0.0625437		0.0222488	0.0124582	0.0215976
	300	0.00196173	0.00442227	0.00250609		0.0722638	0.00663511	0.0144885
	301	0.0171693	0.0170019	0.00640796		0.0411715	0.0213615	0.00539908
	302	0.00938087	0.00920452	0.00267006		0.00465757	0.017815	0.0142858
	303	0.00297404	0.00861037	0.0178243		0.0202318	0.0298109	0.0030717
	304	0.097422	0.0214936	0.057635		0.00376461	0.0144676	-0.00191937
	305	0.00671269	0.00784459	0.0877193		0.13287	0.00345029	0.00459994
	306	0.0130425	0.00409222	0.00373948		0.0370187	0.00122076	0.000674598
	307	0.0789626	0.0165577	0.00731429		0.0128966	0.00195913	0.000904518
	308	0.00524459	0.0126615	0.00220761		0.0133735	0.00695004	0.00931214
	309	0.0397567	0.00708292	0.0173551		0.0167284	0.0131635	0.0117434
	310	0.0608528	0.00456731	0.00946336		0.208099	0.0568703	-0.00263478
	311	0.0152234	0.0463895	0.0125536		0.0309895	0.0612044	0.0206745
	312	0.0213246	0.0392009	0.000940691		0.044249	0.0147013	0.00533364
	313	0.0140289	0.0151807	0.000640819		0.044189	0.00246422	0.013484
	314	0.00436181	0.012734	0.0195288		0.131773	0.00219158	0.0106875
	315	0.00568074	0.00489712	0.000627912		0.0052928	0.0116423	0.000307164
	316	0.02083	0.020498	0.00797601		0.0426127	0.100621	0.0170599
	317	0.274829	0.0893837	0.0316531		0.0102236	0.0282354	0.00228149
	318	0.00742908	0.0100385	0.00221347		0.00745047	0.0102697	0.00874748
	319	0.236999	0.0430764	0.00841185		0.0499931	0.00989989	0.00483125
	320	0.00573182	0.0080724	0.00302821		0.0100815	0.0159467	0.00237264
	321	0.0194216	0.00459381	0.00468872		0.0754505	0.0127439	0.000569821
	322	0.0173827	0.0197386	0.00108426		0.151557	0.0113332	0.00117999
	323	0.00705522	0.00640757	0.000778555		0.101769	0.00365287	0.0252113
	324	0.00963481	0.00596749	0.00522751		0.0944457	0.0180473	0.0153492
	325	0.00877596	0.00552571	0.00208758		0.0101999	0.0165538	0.0123701
	326	0.00606536	0.0146513	0.0150546		0.00488926	0.00122549	0.000877436
	327	0.0108039	0.0561776	0.0618245		0.0151028	0.0164452	0.00434108
	328	0.0113007	0.038148	0.0053785		0.0241429	0.0168114	0.00280305
	329	0.0108847	0.00715518	0.00405549		0.0162183	0.00382408	0.0057678
	330	0.01355	0.00306928	0.00255705		0.068132	0.040674	0.0217066
	331	0.0158448	0.0136464	0.00361578		0.170254	0.0485594	0.00494462
	332	0.00275672	0.00985414	0.00123394		0.0877753	0.0212692	0.00241361
	333	0.0204646	0.0315226	0.00887085		0.147151	0.0127653	0.142102
	334	0.0543429	0.0174788	0.00304664		0.0202272	0.00335677	0.000876193
	335	0.021733	0.0231305	0.00126903		0.0431776	0.0191407	0.0142597
	336	0.0375488	0.0159472	0.000975926		0.00592603	0.0147609	0.0273572
	337	0.0138389	0.0193932	0.0143726		0.00652237	0.0126648	0.00503848
	338	0.0017107	0.00992383	0.00194229		0.00213759	0.0120736	0.0137182
	339	0.0251483	0.00468886	0.00238522		0.028905	0.0123146	0.00243711
	340	0.115291	0.00185485	0.0175061		0.122326	0.0291388	0.00148714
	341	0.0179592	0.0254383	0.0190377		0.0103693	0.00452018	0.00328186
	342	0.135741	0.08509	0.00235691		0.0198041	0.00478609	0.0205587
	343	0.103771	0.0146926	0.00479585		0.175454	0.00174266	0.0303603
	344	0.0217605	0.00885717	0.000169298		0.0449922	0.0136807	0.00703627
	345	0.00316436	0.00505945	0.00151633		0.0114272	0.00223951	0.000339693
	346	0.0147615	0.0053761	0.00238461		0.275877	0.0103974	-0.000463057
	347	0.00212329	0.00839418	0.00295593		0.00519806	0.00528238	0.0020535
	348	0.000857212	0.00198256	0.00384246		0.0193236	0.041831	0.0162219
	349	0.00580692	0.00252983	0.000747384		0.119057	0.00276824	0.00349843
	350	0.0109039	0.0138958	0.00123432		0.0878377	0.00856614	0.0245626
	351	0.0830163	0.0174938	0.00201348		0.00475642	0.00601196	0.000145434
	352	0.0393902	0.0285155	0.00172863		0.14912	0.00413888	0.0179014
	353	0.0131141	0.0101247	0.0184686		0.092576	0.0388643	0.000544914
	354	0.00514878	0.00740437	0.00647468		0.0284025	0.0193459	0.00911656
	355	0.00436753	0.0649668	0.000272266		0.185962	0.0987249	0.00103021
	356	0.021347	0.0159889	0.00224453		0.257182	0.00185867	0.00262467
	357	0.0237545	0.0108095	0.00751629		0.0429336	0.0518139	5.72594e-05
	358	0.00440129	0.00843627	0.0170466		0.0219154	0.0110498	0.00224943
	359	0.00739502	0.0328006	0.00647942		0.0303541	0.00324695	0.00596343
	360	0.012753	0.0126396	0.00868208		0.0316806	0.00582361	0.00960059
	361	0.053117	0.0154008	0.00125718		0.00502621	0.00668388	0.00726752
	362	0.00230842	0.00148599	0.00237561		0.00832088	0.0168485	0.01451
	363	0.0130207	0.0124418	0.00081429		0.0125664	0.0117699	0.0011046
	364	0.00643894	0.00300621	0.00297113		0.0425524	0.004842	0.00289356
	365	0.00587991	0.00570816	0.00601613		0.017194	0.0446489	0.00238063
	366	0.00263286	0.0108468	0.0122959		0.00934413	0.0209897	0.00437161
	367	0.00931372	0.00416212	0.00197657		0.313159	0.00499686	0.0142006
	368	0.00273152	0.00986519	0.00272445		0.0477547	0.0191906	0.00695999
	369	0.0347107	0.00405231	0.00855627		0.0592314	0.0689044	0.000149439
	370	0.0190412	0.00293636	0.0029554		0.00734019	0.00479763	0.00170012
	371	0.00916205	0.0132777	0.00166767		0.0916655	0.00610949	0.00313975
	372	0.0678137	0.0117688	0.0249809		0.0620745	0.0179365	0.0132852
	373	0.00711318	0.00387044	0.0110984		0.015024	0.0247753	0.00717848
	374	0.00596163	0.0065612	0.00704576		0.00758541	0.00686112	0.00458466
	375	0.0674123	0.0121326	0.020103		0.0896111	0.00835912	0.00221534
	376	0.0142156	0.0093619	0.012488		0.0151762	0.010923	0.0158531
	377	0.00909984	0.00587617	0.00113182		0.00650305	0.00778827	0.00281179
	378	0.00262607	0.0381244	0.00124124		0.0592177	0.0153198	0.0407158
	379	0.00438322	0.00334511	0.00624961		0.00546812	0.0129588	0.00376623
	380	0.00500683	0.00430513	0.00491731		0.238466	0.00500963	0.00618944
	381	0.00433677	0.0151616	0.0073275		0.00947989	0.00767654	0.0089162
	382	0.00798141	0.0104177	0.00583302		0.258813	0.00962003	0.00146956
	383	0.00231391	0.0305243	0.000850991		0.241406	0.00617185	0.000934553
	384	0.0434417	0.00581974	0.00373545		0.155468	0.0129378	0.00605654
	385	0.00302711	0.00510575	0.0101431		0.00400593	0.0122755	0.00100427
	386	0.081659	0.00830825	0.00264299		0.135154	0.00784692	0.00251561
	387	0.00673188	0.00422724	0.00537546		0.089147	0.0267621	0.00176803
	388	0.00876154	0.00487032	0.000361348		0.0400606	0.00896395	0.00394909
	389	0.0121058	0.00474931	0.0205591		0.176547	0.029711	0.000712319
	390	0.0116875	0.00579385	0.00416207		0.00699142	0.0692253	-0.00603973
	391	0.0349967	0.00484397	0.00418212		0.0478608	0.0862975	-0.000348272
	392	0.00538352	0.00550844	0.00166718		0.00436648	0.0144071	0.00101549
	393	0.0242949	0.0110237	0.000834188		0.130251	0.0217452	0.00132928
	394	0.0170105	0.00389509	0.0120393		0.0073549	0.0217125	0.00556793
	395	0.0136598	0.0310727	0.00896521		0.0169543	0.00545417	0.00940779
	396	0.00370561	0.0553178	0.00940337		0.235246	0.00622422	0.0145989
	397	0.0817727	0.0321656	0.00482228		0.00734767	0.0033608	0.00230609
	398	0.00744858	0.0476295	0.0392888		0.00302843	0.0274104	0.00219721
	399	0.00459438	0.0320439	0.0370261		0.0280424	0.0149137	0.00180013
	400	0.0130495	0.0396515	0.00213831		0.0225441	0.0514213	-0.000965839
	401	0.0250492	0.00734419	0.00237505		0.00793543	0.0268051	0.00560074
	402	0.00881491	0.0395095	0.0054701		0.0122338	0.0119695	0.000471657
	403	0.0585268	0.0077228	0.00700251		0.07446	0.00142879	0.000657918
	404	0.0047581	0.0783456	0.00327629		0.00927226	0.0356966	0.0110606
	405	0.00274236	0.00642526	0.00268125		0.00478321	0.016269	0.00142424
	406	0.147557	0.0169346	0.0186559		0.148596	0.00272663	0.00376614
	407	0.0064385	0.026656	0.0174732		0.0614889	0.00785507	0.00211986
	408	0.0191786	0.0114907	0.0025259		0.121159	0.00588908	0.00552936
	409	0.0247819	0.0155948	0.0115948		0.0421922	0.00718524	0.00296531
	410	0.00143807	0.00858452	0.00121455		0.136921	0.00942333	0.00148327
	411	0.00592254	0.064871	0.0417127		0.139226	0.00463517	0.00664437
	412	0.00543056	0.0185063	0.00477889		0.00404375	0.00427982	0.00107455
	413	0.0224426	0.0322463	0.0057824		0.022138	0.00271395	0.00153397
	414	0.00665318	0.0177581	0.00519731		0.0713211	0.00582677	0.00983209
	415	0.0117157	0.0551837	0.00997627		0.039928	0.0211707	0.00249862
	416	0.00179825	0.0097434	0.00922914
	417	0.0031582	0.00370346	0.00501196
	418	0.0215152	0.0178462	0.00598208
	419	0.0480379	0.00227341	0.0013938
	420	0.0308851	0.00466054	0.00225762
	421	0.00260695	0.0122294	0.00674819
	422	0.0104878	0.0618032	0.00744855
	423	0.010244	0.013185	0.0028826
	424	0.00559211	0.0184335	0.00114579
	425	0.00148856	0.00923887	0.00230188
	426	0.00672937	0.0207344	0.00697073
	427	0.0151319	0.0068016	0.0136514
	428	0.0178563	0.0134221	0.00448055
	429	0.0261146	0.0336761	0.00389651
	430	0.0052936	0.00296617	0.00120405
	431	0.00783415	0.0182832	0.00954158
	432	0.0228901	0.0617584	0.0130526
	433	0.0097952	0.0488518	0.00312278
	434	0.0303323	0.0184692	0.00576139
	435	0.0256004	0.00744843	0.00216049
	436	0.0111088	0.00268812	0.00856074
	437	0.00570133	0.00227867	0.00381006
	438	0.00439002	0.00831442	0.000826021
	439	0.00821945	0.017046	0.0199035
	440	0.133678	0.0129639	0.0637009
	441	0.00437748	0.0182979	0.00344837
	442	0.00458589	0.0157499	0.00488806
	443	0.0166931	0.112023	0.00288812
	444	0.0741189	0.0450271	0.00341935
	445	0.0369411	0.0106506	0.000998323
	446	0.0058204	0.0161482	0.00280433
	447	0.00210151	0.0141163	0.00499448
	448	0.00325064	0.0113712	0.00319397
	449	0.0107976	0.0160844	0.00510552
	450	0.0953505	0.0750932	0.0601277
	451	0.00212016	0.0580589	0.0139684
	452	0.0109185	0.0175577	0.00522834
	453	0.0453329	0.0322154	0.00507255
	454	0.0111599	0.0309218	0.00217195
	455	0.0121282	0.0163562	0.00226213
	456	0.0405423	0.0208318	0.0276174
	457	0.0252637	0.00927641	0.00524241
	458	0.00212615	0.00846529	0.00496082
	459	0.00428658	0.0315947	0.0137738
	460	0.0106457	0.0197835	0.00316003
	461	0.0163292	0.0250431	0.00142185
	462	0.00983614	0.0129837	0.0128191
	463	0.0118448	0.00410642	0.00430419
	464	0.014413	0.0309936	0.00152665
	465	0.0195027	0.0154951	0.00450068
	466	0.0290035	0.00941287	0.00185351
	467	0.0370133	0.0237919	0.0128809
	468	0.0103854	0.0150677	0.00212875
	469	0.0405051	0.0700627	0.0131206
	470	0.013502	0.0263576	0.00039148
	471	0.00409067	0.0524023	0.00309612
[truncated: 83 more columns]

## Sheet: Figure 3
	Figure 3a/b						Figure 3c					Figure 3d
	Unit #	CueSI slope of MD	Unit #	CueSI slope of OFC			Unit #	MD: Slope of outcome SI	MD: Intercept of outcome SI			Unit #	OFC: Slope of outcome SI	OFC: Intercept of outcome SI
	1	0.302449	1	0.547172			1	0.374651	0.00905477			1	1.17364	0.74274
	2	-0.212482	2	-0.220731			2	-1.14311	1.73053			2	-0.363092	-0.842517
	3	-0.0426592	3	0.140159			3	-0.194027	0.709145			3	-0.030879	1.0756
	4	0.720735	4	-0.0589138			4	-0.783495	0.628354			4	0.140575	1.07327
	5	-0.826946	5	0.700238			5	-0.614209	2.61421			5	-0.190625	-0.228976
	6	0.263204	6	0.0513474			6	-1.48349	0.850957			6	0.401547	-1.12447
	7	0.298526	7	0.406105			7	-1.278	1.53715			7	0.0636828	0.708711
	8	0.622542	8	0.199088			8	-1.67807	2.0418			8	-0.0200698	1.78534
	9	0.136964	9	0.0407236			9	-1.0738	0.129144			9	0.168472	1.69148
	10	0.13913	10	-0.115822			10	0.00790244	0.608149			10	-0.476154	0.60892
	11	0.269995	11	-0.116247			11	-1.60619	1.70544			11	1.1159	-2.37669
	12	-0.0603313	12	0.00971815			12	0.390965	0.506338			12	-0.508832	-0.569828
	13	0.445976	13	0.670507			13	-0.179986	0.929182			13	0.999625	-2.83611
	14	-0.0167014	14	0.620966			14	-0.114624	0.213813			14	1.04915	-2.05069
	15	0.0888855	15	0.0607157			15	-1.43147	0.0116387			15	0.0300024	0.42868
	16	0.0427128	16	-0.190095			16	0.341381	0.135126			16	-0.154381	0.946459
	17	-0.087344	17	-0.104531			17	-0.391685	0.265867			17	-1.00456	2.49026
	18	0.487366	18	-0.355481			18	0.0421603	0.984458			18	0.285813	1.71419
	19	0.718909	19	0.174621			19	-1.01935	1.74069			19	-0.823183	0.00608186
	20	0.424011	20	0.0605119			20	-0.248115	0.28978			20	0.293467	-0.474189
	21	0.227736	21	0.349654			21	0.327653	0.419645			21	-1.33686	1.8529
	22	-0.125108	22	0.429229			22	-0.0383749	0.290326			22	0.517248	-0.998308
	23	0.0260208	23	-0.2345			23	1.24037	0.347471			23	-0.864556	2.86456
	24	0.310656	24	0.467843			24	-1.96773	0.627905			24	0.769519	0.0379814
	25	-0.295407	25	0.106142			25	-1.80415	1.7636			25	0.213122	-0.232345
	26	0.167198	26	-0.120254			26	-0.601937	1.69696			26	1.96087	-1.25414
	27	-0.00947387	27	0.0719664			27	-0.284016	-0.121414			27	0.148002	-0.0417115
	28	0.634899	28	-0.0351412			28	-0.935028	0.237153			28	0.698854	0.0446525
	29	-0.654421	29	0.995029			29	-1.81335	1.41053			29	0.735608	0.457019
	30	0.612319	30	0.682			30	0.53501	0.118818			30	-0.0908122	0.825538
	31	0.372931	31	0.357234			31	-0.284892	1.32071			31	-0.514739	-0.544601
	32	0.485706	32	0.157096			32	-0.671092	0.430343			32	-0.0385118	-0.801592
	33	0.143433	33	0.350899			33	-1.49033	0.874324			33	0.215066	-0.100009
	34	-0.105517	34	0.317315			34	-0.437006	-0.605398			34	-0.0248325	0.222808
	35	0.536219	35	0.0871695			35	0.276514	-1.04359			35	0.542564	0.301447
	36	0.0365296	36	0.0397076			36	-0.151096	0.347576			36	-0.0145959	0.68827
	37	0.130758	37	0.361464			37	-0.358757	0.243235			37	0.757753	-0.148303
	38	-0.362333	38	0.220985			38	-0.378748	1.62403			38	-0.988497	0.633675
	39	0.759001	39	0.379608			39	-1.97548	0.938449			39	0.435773	-0.0947176
	40	-0.202786	40	-0.00355298			40	-0.150334	0.094089			40	-0.208885	0.544282
	41	0.0270053	41	0.185761			41	-2.09437	1.32969			41	0.253495	0.072042
	42	-0.266547	42	-0.0359068			42	0.453858	-1.16498			42	-0.455403	2.25416
	43	0.863597	43	0.150757			43	-0.312011	-1.02397			43	1.16466	0.835335
	44	-0.124231	44	0.133204			44	-2.18161	1.60726			44	0.271119	-0.792629
	45	0.149032	45	0.00263547			45	-1.7711	2.74497			45	-0.299894	1.29256
	46	0.836136	46	-0.0857149			46	-2.03286	1.70347			46	0.304475	-1.14781
	47	0.544555	47	-0.0620353			47	-0.907775	0.726509			47	-0.563066	1.02453
	48	0.389115	48	-0.190836			48	-2.01482	0.290789			48	0.149282	-1.46576
	49	0.705178	49	-0.174083			49	-0.0628776	0.925427			49	0.943146	-2.94315
	50	-0.00596252	50	0.0180188			50	-0.692533	-0.591967			50	0.487993	-0.140893
	51	0.494399	51	0.193607			51	-0.752128	-1.24787			51	0.653232	-0.158451
	52	0.664979	52	0.272461			52	-0.433638	0.00288664			52	0.322648	0.251322
	53	0.037095	53	0.148733			53	-1.15836	-0.042442			53	0.373739	-0.00843081
	54	0.549538	54	0.164842			54	-0.0885413	0.159948			54	0.280856	-0.226152
	55	0.262043	55	-0.0972084			55	1.07969	-0.131118			55	1.03867	-1.21195
	56	0.041702	56	0.101932			56	-0.00560752	1.73386			56	2.10804	-0.96127
	57	0.544844	57	0.0397073			57	-1.42389	2.04152			57	0.665047	-0.161749
	58	0.0685598	58	0.19453			58	0.707897	-0.193744			58	0.587376	0.0732314
	59	0.266805	59	0.149733			59	-0.385599	2.21548			59	0.0114098	0.311052
	60	0.373771	60	0.175923			60	-0.0227649	0.607775			60	-0.548598	1.13494
	61	0.0588085	61	0.575895			61	-0.770139	1.05103			61	0.0600341	0.405449
	62	-0.373299	62	0.0979866			62	0.0549887	1.88369			62	-1.06926	2.03467
	63	0.677718	63	0.456644			63	-0.696486	2.31373			63	0.141498	-0.069397
	64	0.348458	64	0.588348			64	0.467791	-0.449865			64	0.497181	-0.481772
	65	0.254102	65	0.216555			65	0.464071	1.35219			65	0.963129	-1.78381
	66	0.301783	66	0.0666197			66	0.31078	-0.652907			66	-0.251107	0.503569
	67	0.117706	67	-0.159322			67	-0.507982	-0.637557			67	1.13266	-1.9207
	68	0.919982	68	0.1972			68	-0.715415	-0.25968			68	0.591875	-0.247905
	69	0.434996	69	0.0670835			69	0.152755	1.70889			69	0.717085	-1.11749
	70	0.151895	70	0.718285			70	-0.249557	-0.266023			70	0.266166	-0.217632
	71	0.357255	71	0.075836			71	-0.192428	0.00192905			71	-0.0444799	2.04448
	72	0.31563	72	0.143909			72	-0.298335	1.64799			72	0.107963	0.312595
	73	-0.202363	73	0.179619			73	0.575517	1.39484			73	-0.0446971	0.958901
	74	0.369256	74	0.574222			74	-0.400624	0.107334			74	-0.0553339	0.544358
	75	0.0126011	75	0.44946			75	0.551724	-2.55172			75	0.479434	-1.20361
	76	-0.0272394	76	0.0966652			76	1.18186	0.692603			76	0.554786	0.69349
	77	-0.231152	77	0.546552			77	-0.616497	-0.064182			77	0.337144	0.265729
	78	0.121949	78	0.291186			78	2.18995	-1.56708			78	-0.00571183	0.398218
	79	0.909528	79	0.465319			79	0.881708	0.221539			79	-0.56127	0.76951
	80	0.155821	80	-0.242521			80	-0.736012	-1.26399			80	-1.88267	1.3809
	81	0.441748	81	0.785132			81	0.61672	-0.291849			81	-0.237985	2.07576
	82	-0.0582046	82	0.0621909			82	0.275388	0.629208			82	0.375213	0.489768
	83	0.186255	83	0.183409			83	-1.76475	1.07273			83	-1.14913	2.46304
	84	-0.01824	84	0.645074			84	0.499854	-0.160061			84	0.0458814	0.230921
	85	0.14971	85	0.31782			85	-0.685879	-0.409844			85	0.230999	0.100255
	86	0.377185	86	0.617444			86	0.586887	0.580502			86	0.755228	0.546085
	87	0.203339	87	0.229689			87	0.275657	-2.04295			87	0.302459	0.902195
	88	0.403508	88	0.0151319			88	0.121246	-0.608514			88	0.433537	0.245263
	89	0.307189	89	0.29813			89	1.30238	-0.98743			89	-0.0111071	1.77792
	90	0.0926413	90	0.522588			90	-0.502526	0.793674			90	-0.114155	0.00428027
	91	0.375312	91	0.0365065			91	0.543082	-0.816677			91	-0.416685	0.225768
	92	0.371114	92	0.0186963			92	1.49249	-1.35076			92	-0.347785	1.6164
	93	0.272141	93	-0.0314607			93	0.151482	0.441112			93	1.69244	-1.65084
	94	0.358015	94	0.105689			94	-0.636065	0.424323			94	0.221522	0.781829
	95	0.0117115	95	0.0910499			95	0.388211	-0.774864			95	0.159198	0.309419
	96	0.150114	96	0.782573			96	-0.543303	0.0417357			96	-0.0375589	-0.0655413
	97	0.588191	97	0.301106			97	0.297926	1.70207			97	0.333903	0.88908
	98	0.680267	98	0.115668			98	0.443638	1.01385			98	-0.0472409	0.00398594
	99	0.0225569	99	0.124804			99	0.234404	0.157284			99	-0.094447	0.121291
	100	0.0736416	100	0.743157			100	-1.51834	-0.256904			100	-0.161932	-0.223352
	101	0.590517	101	0.249482			101	-0.158962	-0.880034			101	0.0223142	0.0804371
	102	0.489224	102	0.160307			102	-0.149534	0.394565			102	-0.059353	-0.0662949
	103	0.227206	103	0.9583			103	0.185878	-0.0904103			103	-1.00957	1.60657
	104	0.102149	104	0.24335			104	-1.68846	1.12586			104	-0.105233	0.205665
	105	0.314005	105	0.0764343			105	-0.262989	-1.44076			105	0.0883015	0.0994117
	106	0.444063	106	0.582395			106	-0.442463	2.06841			106	-0.0674639	0.075863
	107	0.226862	107	0.202432			107	0.920895	1.07911			107	-0.124379	1.62194
	108	0.528073	108	0.689582			108	-0.36024	1.35045			108	0.527518	-1.25996
	109	0.301413	109	0.0261573			109	-0.487938	0.680605			109	0.292488	-0.352657
	110	0.415691	110	1.25608			110	-1.26382	0.410714			110	-0.151109	0.060184
	111	-0.0295334	111	0.988742			111	-0.862442	-0.366217			111	0.133944	-0.16543
	112	0.391208	112	0.20231			112	-0.397087	-0.747806			112	0.0203192	-0.204386
	113	0.372753	113	0.266912			113	-0.00722946	0.754973			113	-0.188415	0.109475
	114	0.177458	114	0.649183			114	-0.318711	0.307765			114	0.00677165	0.288194
	115	0.615298	115	0.393681			115	-0.968129	-0.204659			115	0.599762	0.319841
	116	0.323867	116	0.00501771			116	-2.20268	2.13473			116	0.777092	-1.31166
	117	0.631805	117	0.22844			117	-0.555582	2.39792			117	0.258111	-0.0401626
	118	0.168637	118	0.481368			118	-1.03453	-0.242421			118	0.0181037	0.607271
	119	0.344958	119	0.0630078			119	0.705426	0.672474			119	-0.169195	0.315206
	120	0.773857	120	0.255161			120	1.58939	-2.68704			120	0.530669	-1.15478
	121	0.27764	121	0.208222			121	-0.670891	0.44158			121	-0.195941	-0.233597
	122	0.262761	122	-0.0648388			122	-2.60605	2.41139			122	0.0572618	0.0690425
	123	-0.198893	123	0.0210812			123	-0.820521	-0.283833			123	0.295577	-0.199571
	124	0.20873	124	0.375028			124	0.302972	1.69703			124	0.363725	0.105232
	125	0.207713	125	0.426175			125	-0.353696	0.372667			125	0.627685	0.561525
	126	0.28177	126	0.115759			126	0.308058	1.69194			126	0.0213751	-0.168213
	127	0.211081	127	0.380093			127	0.11087	-0.0214382			127	0.0817485	0.0187931
	128	0.141039	128	0.143325			128	0.51212	-0.785945			128	-0.0308696	0.0126084
	129	0.460602	129	0.369049			129	-0.174724	0.422823			129	-0.03188	0.0253461
	130	0.44903	130	0.0542403			130	0.0244929	-0.355072			130	-0.165142	0.0403953
	131	0.191822	131	-0.308074			131	0.647489	0.92313			131	0.22371	0.223095
	132	0.470575	132	0.170486			132	-0.503296	0.452564			132	-0.115001	0.181349
	133	-0.0775195	133	0.544945			133	0.182467	-0.631453			133	0.466269	1.16751
	134	0.189682	134	0.0232269			134	-0.203386	1.44594			134	0.00433099	0.150423
	135	0.117501	135	0.124576			135	0.125991	0.610481			135	0.226434	-0.217683
	136	0.125689	136	0.00113851			136	-1.1909	0.65683			136	0.695086	-2.43503
	137	0.471009	137	0.250169			137	0.583532	1.10031			137	-0.108499	0.377983
	138	0.0252311	138	0.0721182			138	-0.0807396	1.30826			138	-0.335939	-1.66406
	139	0.297638	139	0.167011			139	-0.481731	-1.51827			139	-0.215439	0.496116
	140	1.20685	140	0.231255			140	-0.038393	-0.0559248			140	-0.0349067	0.234271
	141	0.581716	141	0.159325			141	1.72215	-0.781043			141	-0.351779	0.463833
	142	0.467547	142	0.304586			142	-0.839161	1.07918			142	0.114676	-0.291023
	143	1.02209	143	0.154795			143	-0.16246	1.41461			143	0.698198	-0.438569
	144	0.1337	144	0.262003			144	1.17093	0.622033			144	0.227642	0.0408125
	145	0.208269	145	0.24857			145	0.506417	0.120241			145	-0.649394	0.505763
	146	0.137189	146	0.555019			146	-0.364835	0.641704			146	1.5335	-0.300352
	147	0.0145622	147	0.345463			147	-0.208836	0.376189			147	-0.200712	-0.42086
	148	-0.239959	148	-0.115575			148	-0.152513	-0.630618			148	0.857512	0.191396
	149	-0.0800948	149	0.214095			149	0.111895	-0.193375			149	-0.389066	-0.722957
	150	0.270752	150	0.100261			150	-0.0898392	-0.270241			150	0.683094	0.226718
	151	-0.0403605	151	0.0129125			151	0.125535	-0.690199			151	-0.41137	-0.553147
	152	0.106414	152	-0.0304695			152	-0.0538151	0.175007			152	0.713889	0.000920869
	153	0.147015	153	0.455899			153	0.183026	-0.380434			153	0.0776514	-1.62555
	154	0.39692	154	-0.00387464			154	-0.0169032	-0.383279			154	0.422373	0.717598
	155	0.15364	155	0.815681			155	-0.0381274	-0.144563			155	1.07024	-1.05927
	156	0.192182	156	1.29536			156	-0.0719373	0.633441			156	1.36308	-0.291404
	157	0.357226	157	1.0976			157	-0.0154389	-0.503621			157	-0.0569208	0.502973
	158	0.0396025	158	0.0083806			158	0.103422	1.12713			158	-1.63646	1.38659
	159	0.307706	159	0.448193			159	-0.857889	0.946685			159	0.0338129	0.268681
	160	0.0978147	160	0.0617128			160	-0.0654522	0.236743			160	1.14198	-0.894562
	161	-0.101511	161	0.110854			161	0.268779	-0.376063			161	0.688776	-0.293509
	162	0.0681769	162	-0.0058428			162	0.118189	0.0738635			162	-0.544121	0.549
	163	-0.000660959	163	0.400383			163	0.293229	1.70677			163	0.0307223	-0.448401
	164	0.30426	164	0.185992			164	-0.163367	0.649931			164	0.199704	0.771482
	165	0.170188	165	0.0122967			165	-0.0940671	0.511752			165	-0.860439	0.025232
	166	0.0994273	166	1.31193			166	-0.0894164	-0.563381			166	2.6702	-1.56201
	167	0.314783	167	0.070061			167	-0.822344	1.39771			167	0.877293	-0.540342
	168	0.330819	168	0.00686802			168	-0.334678	1.16605			168	0.206819	0.163513
	169	0.51614	169	-0.0346638			169	-0.215907	-0.098349			169	0.888767	-0.786238
	170	1.1692	170	0.142004			170	-0.088378	-0.811656			170	-0.654338	2.05425
	171	0.509771	171	0.1461			171	-0.195598	0.207583			171	0.280711	-0.183127
	172	0.047039	172	0.0648239			172	0.684362	1.31564			172	1.42029	-0.107566
	173	0.23337	173	0.776226			173	-0.0832525	0.457652			173	0.304813	-0.183475
	174	0.242472	174	0.40045			174	-0.220644	0.585466			174	0.65883	-0.827713
	175	0.263874	175	-0.0316843			175	0.14088	-0.351034			175	0.469672	0.636009
	176	0.49042	176	0.447338			176	0.217411	0.0457053			176	0.409479	-0.850602
	177	0.318808	177	0.241697			177	-0.108089	0.195735			177	2.11521	-2.39605
	178	0.280287	178	0.132618			178	0.0441622	0.485457			178	0.124932	1.83736
	179	0.181601	179	-0.0391165			179	0.439722	1.56028			179	-0.666981	0.542645
	180	0.113898	180	0.021795			180	0.543668	-2.54367			180	0.164079	0.374545
	181	0.758402	181	-0.027811			181	0.214251	1.62865			181	-0.548378	1.38445
	182	-0.0169727	182	0.220796			182	-0.093996	-1.1589			182	1.17415	-0.269411
	183	0.180648	183	0.192722			183	0.16743	-0.227617			183	0.296997	0.318093
	184	0.218843	184	0.178033			184	-0.0480768	0.351339			184	1.55141	-1.29736
	185	0.199123	185	0.0180406			185	0.0946721	0.832127			185	0.280548	0.291667
	186	0.150092	186	0.898008			186	0.124785	-0.73893			186	-1.4687	1.80359
	187	0.0549688	187	-0.0784918			187	-0.0987292	1.29284			187	-2.79342	4.67336
	188	0.42589	188	-0.623391			188	0.744141	-0.948846			188	-0.176027	1.53388
	189	0.00221707	189	0.105345			189	-0.109091	0.843067			189	0.701797	0.252241
	190	0.155521	190	0.267354			190	0.53485	-0.857801			190	1.05358	0.288528
	191	0.0982915	191	-0.339331			191	-0.128337	1.05584			191	0.238493	1.48197
	192	0.0242982	192	0.181127			192	0.240069	-0.00442173			192	0.901972	0.717243
	193	0.162124	193	0.0400591			193	-0.0936065	0.435675			193	0.0675958	0.397691
	194	0.908216	194	0.722536			194	0.773187	-2.39045			194	1.84726	-0.246547
	195	0.201204	195	0.671184			195	-0.026298	0.221924			195	-0.355408	-0.0232952
	196	1.10672	196	0.315883			196	-0.43829	0.145574			196	-0.34453	0.542595
	197	0.104521	197	0.414875			197	0.154471	-0.217501			197	-2.74351	0.915793
	198	-0.141809	198	0.215112			198	-0.222574	0.781766			198	0.249592	1.72671
	199	0.0497661	199	0.0677536			199	0.177525	-0.313393			199	1.21854	0.732581
	200	0.260657	200	0.523716			200	-0.150979	0.361971			200	0.367552	1.63245
	201	0.150066	201	0.322679			201	0.109772	-0.0509704			201	-1.14241	0.790065
	202	0.248774	202	0.284631			202	0.155104	0.0220725			202	-0.0204941	0.231766
	203	0.32015	203	0.415984			203	0.521365	-0.526127			203	-1.00797	-0.778579
	204	1.48306	204	0.38882			204	0.0732127	-0.322391			204	0.0191362	-0.0306194
	205	0.699791	205	-0.216009			205	0.0379419	-0.129236			205	0.31204	-2.31204
	206	0.527987	206	0.270518			206	-0.455352	1.96961			206	0.513085	0.59126
	207	-0.210114	207	0.0208522			207	1.83078	-2.19374			207	0.766043	0.178086
	208	0.175773	208	0.109224			208	-0.0603379	0.61033			208	0.599676	-0.305906
	209	-0.240333	209	0.451314			209	-0.35392	1.90671			209	-1.15778	-0.252474
	210	0.223652	210	0.210458			210	0.125602	-0.26327			210	-2.10919	2.17014
	211	0.317966	211	0.133227			211	1.30964	-2.92414			211	0.081267	0.820314
	212	0.141095	212	0.185874			212	0.145926	0.762358			212	1.27335	0.615831
	213	-0.25814	213	0.587938			213	-0.209605	0.234481			213	0.100631	-0.0617588
	214	0.0594285	214	0.340552			214	0.194279	0.0687451			214	-2.17442	3.11501
	215	0.646787	215	0.194671			215	-0.053824	-0.928364			215	-1.2313	-0.154837
	216	0.0667692	216	0.00543628			216	0.054313	-0.174198			216	0.0526887	-0.0560063
	217	-0.341459	217	-0.271294			217	0.55142	-0.789988			217	0.812768	-0.684939
	218	0.0941912	218	0.119348			218	1.38619	-0.559121			218	0.730697	0.654684
	219	0.129071	219	-0.209371			219	-0.340852	-0.234566			219	-0.0668587	0.393702
	220	0.0277985	220	0.684201			220	-0.288591	-1.71141			220	-0.00910549	1.4776
	221	0.153038	221	0.0915068			221	1.6517	-1.26751			221	0.611216	-0.820192
	222	0.584791	222	0.047461			222	0.538586	-0.690559			222	-0.388804	-0.934096
	223	-0.306686	223	-0.00476902			223	1.44689	-1.60153			223	0.0828846	-0.194988
	224	0.164164	224	0.0372474			224	1.47509	-0.646904			224	-0.165425	0.498511
	225	0.340473	225	1.139			225	0.154977	0.185242			225	-1.01186	2.11265
	226	1.07955	226	-0.385572			226	-1.43565	0.823031			226	0.678283	-1.25563
	227	0.300996	227	-0.0556195			227	-0.429634	0.646814			227	-0.348585	1.09418
	228	0.0862284	228	0.0139065			228	-0.492208	1.19576			228	-0.108909	0.535364
	229	1.19175	229	-0.678654			229	-1.38192	0.652523			229	0.285995	0.758396
	230	0.173561	230	-0.442528			230	0.186195	0.515749			230	-1.2062	0.450656
	231	0.299819	231	-0.118063			231	0.339686	0.759797			231	0.264687	-0.609014
	232	0.322339	232	0.426904			232	-1.47664	0.502062			232	-0.834147	-1.16585
	233	-0.137666	233	0.0446516			233	1.73447	-1.35357			233	-0.133816	-0.105483
	234	0.191993	234	-0.330461			234	0.106517	0.698193			234	-0.216204	1.82468
	235	0.877609	235	0.116793			235	-0.163739	1.82343			235	0.595746	-0.931453
	236	-0.30309	236	0.0321493			236	-1.66913	1.02104			236	0.452099	-0.613252
	237	-0.230963	237	-0.0263			237	1.89676	-0.519376			237	0.312603	-0.423465
	238	-0.168632	238	0.983826			238	-0.582235	0.529223			238	0.0421575	0.672147
	239	-0.500115	239	-0.0342713			239	0.00766106	-1.32038			239	-0.0932864	0.15522
	240	0.280856	240	0.315929			240	0.723487	-0.384884			240	0.180694	0.211004
	241	-0.148416	241	0.0334963			241	1.12322	-0.194133			241	-0.81877	1.85507
	242	-0.788373	242	-0.0919067			242	0.708614	0.928346			242	0.0897245	-0.168055
	243	-0.108149	243	0.166452			243	1.43109	-0.793027			243	-0.627293	0.792477
	244	0.404266	244	0.0634899			244	0.485021	0.5593			244	-0.345207	1.27689
	245	0.613676	245	0.569292			245	-0.00328756	0.117396			245	1.12316	-0.343137
	246	0.60651	246	0.175001			246	-0.920707	-1.07929			246	-0.132915	-1.86709
	247	0.347598	247	-0.144325			247	0.357653	-1.59909			247	-0.25456	0.618637
	248	-0.120854	248	-0.296318			248	0.372945	-0.586427			248	-0.0646918	-0.840571
	249	0.478035	249	-0.078687			249	-0.318121	1.78207			249	-0.192248	0.551204
	250	0.202888	250	-0.199917			250	1.39242	-1.05853			250	-0.293491	0.638106
	251	0.23164	251	0.228277			251	0.922815	-2.10724			251	0.431894	-0.218482
	252	0.108778	252	-0.145226			252	-0.284887	1.38046			252	0.240611	-0.520262
	253	0.515973	253	0.00907203			253	2.20618	-1.37207			253	0.351571	-1.65533
	254	-0.146457	254	0.747372			254	2.01547	-1.01871			254	1.07822	-2.31805
	255	0.254408	255	0.341637			255	0.372567	-0.180034			255	-0.0204391	0.0723557
	256	0.317213	256	0.0145365			256	1.11374	-0.416609			256	0.0836357	0.529924
	257	0.0965888	257	-0.0481721			257	0.648058	0.0385515			257	-0.333163	0.953144
	258	0.709523	258	-0.0152974			258	-0.440167	0.585922			258	-0.074462	0.659539
	259	0.22507	259	0.101645			259	-0.706741	1.42472			259	-0.0157722	0.201957
	260	0.518747	260	0.0159323			260	-0.965764	0.0344968			260	-1.62847	0.257696
	261	0.456281	261	0.136645			261	-0.281821	-0.0156734			261	0.512799	-0.549546
	262	-0.115095	262	-0.0127753			262	0.286066	-0.492445			262	-0.00133001	0.857336
	263	0.197793	263	-0.0314381			263	-1.97915	1.4149			263	-0.519652	0.993363
	264	0.318721	264	-0.0352689			264	0.351047	-0.148844			264	-0.113109	0.291211
	265	0.101475	265	1.58624			265	0.0309613	-0.658941			265	-1.15432	0.965624
	266	0.00985689	266	0.0272747			266	-0.552357	-1.44764			266	-0.125981	0.759557
	267	0.673709	267	0.791658			267	0.188304	-0.892016			267	-0.494653	0.831064
	268	-0.544022	268	0.0866765			268	-1.32169	1.96016			268	-1.29609	2.294
	269	-0.000429889	269	0.142854			269	-0.0631958	-0.178649			269	-0.454086	1.14962
	270	-0.339097	270	0.102807			270	0.190179	-0.378878			270	-0.229617	0.824813
	271	-0.649785	271	0.380986			271	-1.83503	-0.0435061			271	-0.285631	0.597871
	272	-0.31204	272	0.147414			272	0.338923	-0.300809			272	-0.268889	0.260372
	273	-0.6297	273	0.0898308			273	-0.16829	-0.79438			273	-0.887972	0.539967
	274	0.0799087	274	0.215529			274	-0.252029	-0.898884			274	-0.83435	0.650157
	275	0.0170987	275	0.337663			275	0.130412	-0.0108002			275	-0.254972	0.190831
	276	0.454233	276	0.0638795			276	0.525346	-1.37334			276	0.197224	-0.371172
	277	0.308686	277	1.81172			277	-0.380238	0.519804			277	0.0539516	0.322074
	278	-0.156076	278	-0.00145599			278	0.233425	-0.220161			278	0.204134	-0.0714281
	279	-0.343802	279	0.278143			279	-0.387823	1.22331			279	0.490057	0.509427
	280	0.14285	280	0.0686618			280	0.201179	1.27452			280	-0.419478	0.653263
	281	0.383341	281	-0.0483801			281	-0.216652	-0.289268			281	-0.397441	1.09368
	282	-0.18229	282	0.0677424			282	-0.752794	1.70227			282	0.604745	-2.60475
	283	0.495496	283	-0.0777254			283	-0.119754	-1.12599			283	0.101669	-0.284574
	284	0.445664	284	0.056865			284	-0.377416	0.41199			284	-0.140495	0.407956
	285	0.0147425	285	-0.248013			285	-0.0661091	0.2942			285	0.197559	0.424923
	286	-0.570496	286	0.214162			286	0.210301	0.0912521			286	-0.314262	0.310902
	287	-0.219193	287	0.177806			287	0.348461	-0.868449			287	-0.0644617	0.181221
	288	-0.14431	288	0.0960752			288	-0.0780465	0.000238424			288	-0.305439	0.689193
	289	0.161009	289	0.0894832			289	-0.638698	0.330362			289	0.0888056	-0.310529
	290	-0.543064	290	0.385318			290	1.11644	-1.34668			290	-0.301902	0.530054
	291	0.278617	291	0.312491			291	-0.632354	-0.550665			291	-0.635196	1.05549
	292	0.587704	292	0.652509			292	1.08866	-1.48941			292	-0.172487	0.651828
	293	0.137353	293	0.141616			293	-0.568727	1.62401			293	-0.547699	0.44468
	294	0.688741	294	0.298546			294	-0.00926951	0.100765			294	-0.421859	1.04512
	295	0.658434	295	0.433157			295	-0.111154	-1.65594			295	0.168093	-0.303982
	296	-0.549	296	0.0383478			296	-0.61904	1.33187			296	-0.642782	0.793141
	297	-0.105452	297	-0.00178306			297	1.60068	-1.3103			297	-0.160445	0.699043
	298	-0.681527	298	0.445275			298	1.43699	-1.87999			298	-0.0681558	0.381694
	299	0.226421	299	-0.0615346			299	-0.783777	2.78378			299	-0.0332163	0.826822
	300	0.304085	300	0.00100226			300	0.811915	-0.631368			300	0.132067	0.638736
	301	-0.392509	301	0.261303			301	-1.01356	0.0973043			301	-0.308845	0.30077
	302	0.105567	302	-0.278791			302	0.0887721	-0.819074			302	-0.180981	0.403572
	303	0.685521	303	-0.00244748			303	0.586199	-2.21713			303	-0.349755	0.350143
	304	0.319902	304	0.370158			304	2.15794	-2.5997			304	0.0333799	0.258598
	305	0.428406	305	-0.0877413			305	-0.179193	-0.474849			305	0.370702	0.826012
	306	0.414259	306	0.24595			306	-1.66108	2.34451			306	-0.926114	1.95286
	307	0.164073	307	-0.373402			307	0.292217	-0.238448			307	0.123627	-0.505464
	308	-0.288113	308	0.0072135			308	-0.0326842	-0.0988094			308	-0.716905	0.195705
	309	0.0866857	309	0.0847945			309	1.85458	-1.59914			309	0.197645	1.59859
	310	-0.0390086	310	-0.0268245			310	-0.118072	-0.854335			310	-0.216721	-0.0832762
	311	0.504964	311	0.214486			311	-0.0361156	0.0205712			311	-0.144957	0.758367
	312	0.559915	312	-0.00161997			312	0.620983	-1.92342			312	-0.536732	-0.772961
	313	0.223899	313	0.35142			313	0.36977	-0.161967			313	-1.29962	1.16892
	314	0.410787	314	0.240977			314	0.602559	-0.783132			314	0.850571	-1.96154
	315	0.451229	315	0.712713			315	0.965407	-2.96541			315	-0.812152	0.822282
	316	0.477214	316	0.222972			316	-0.105027	0.185554			316	-0.114012	0.477034
	317	0.152283	317	0.429705			317	-0.00435527	0.241471			317	0.227037	0.854455
	318	-0.126743	318	-0.211431			318	0.140166	-0.161928			318	-1.59234	3.24576
	319	0.225813	319	0.137917			319	-0.112508	0.0909876			319	0.142326	0.822596
	320	0.972074	320	0.59482			320	-1.41717	2.07027			320	-1.32146	-0.330325
	321	0.0218411	321	-0.00325512			321	-0.627604	0.478374			321	0.429534	-0.0734486
	322	-0.0643207	322	0.00902519			322	-0.775961	0.703964			322	-0.0150914	0.319465
	323	0.159011	323	0.203775			323	-0.533319	0.515207			323	0.868475	-0.210773
	324	0.935443	324	0.0648462			324	-0.103183	1.27073			324	-1.32022	0.428866
	325	0.597272	325	0.0151362			325	0.502982	-1.73706			325	0.114999	0.951017
	326	-0.221225	326	0.0623662			326	0.446104	-0.817266			326	1.09396	-0.990835
	327	0.409783	327	0.579339			327	-0.708991	0.834666			327	0.654321	0.476303
	328	0.571096	328	0.324491			328	0.0113076	-0.443948			328	-0.948175	-0.973887
	329	0.332258	329	0.550122			329	-0.839345	0.746797			329	0.672546	0.327602
	330	0.00696326	330	0.137004			330	0.401761	-1.07971			330	0.0525043	0.147537
	331	1.28767	331	0.0794504			331	0.552839	-0.379222			331	0.0166109	0.454437
	332	-0.0124424	332	0.0922653			332	0.31785	0.824427			332	0.30436	-0.0603433
	333	-0.176907	333	0.149035			333	0.00988713	1.56019			333	0.000170369	5.70428e-05
	334	0.228171	334	0.320474			334	0.721737	-2.50355			334	1.08733	-0.0718547
	335	0.61816	335	0.289994			335	-1.55526	0.46696			335	0.398669	1.22354
	336	-0.111272	336	-0.219346			336	0.161249	-0.518153			336	-0.334062	0.161578
	337	0.405277	337	0.404847			337	-0.320461	0.336148			337	-0.526816	2.16386
	338	-0.174872	338	0.505826			338	-0.675662	-1.09105			338	0.0841141	0.79802
	339	-0.068195	339	0.202317			339	0.262112	0.0503646			339	0.215719	-0.0981715
	340	0.13384	340	0.161217			340	-0.46854	1.10298			340	-0.0251648	0.39081
	341	0.410818	341	1.10942			341	-0.338735	0.36852			341	-1.34667	1.48683
	342	0.0287914	342	-0.184035			342	-0.737126	2.58855			342	-0.603969	1.01341
	343	0.250384	343	0.0521741			343	0.0751821	-0.532605			343	1.21586	-3.20664
	344	0.212164	344	0.0737876			344	-0.47386	2.2159			344	-0.749169	0.076337
	345	0.56368	345	0.119296			345	0.455949	0.0770413			345	-0.314842	-0.957278
	346	0.30266	346	-0.00765998			346	-0.445605	0.467388			346	-1.31425	0.158238
	347	0.721007	347	0.564743			347	0.164592	-0.73312			347	1.17012	-0.37958
	348	0.698301	348	0.432217			348	0.0882642	-0.18039			348	-0.117302	0.593015
	349	0.311354	349	0.114735			349	0.190146	0.507722			349	-0.566264	1.23476
	350	0.43906	350	0.11689			350	-0.368088	-0.516845			350	0.235249	0.174374
	351	0.309006	351	0.618155			351	-1.3883	0.449444			351	-0.713221	0.806251
	352	0.290982	352	0.0451296			352	-0.0773005	-1.9227			352	0.11319	-1.1685
	353	0.649852	353	0.131173			353	-1.34446	2.82367			353	0.254222	0.00800475
	354	0.793671	354	-0.155047			354	0.498331	-0.58204			354	-0.289106	0.118477
	355	-0.569861	355	-0.0562307			355	0.0801816	-0.0148762			355	0.0165271	0.00546813
	356	-0.097158	356	0.00499303			356	-1.37517	1.24399			356	0.00828593	-0.617703
	357	0.148905	357	0.055952			357	-0.440372	1.18279			357	-0.0273479	0.130629
	358	0.312639	358	0.039021			358	-0.443099	-0.230041			358	0.018121	-0.509279
	359	0.194214	359	0.125049			359	0.0651139	0.159576			359	0.166987	-0.647917
	360	0.0676823	360	0.0784814			360	0.222458	-0.600923			360	-0.130608	0.607377
	361	0.415976	361	0.156293			361	0.389802	-0.281722			361	0.59827	-0.235314
	362	-0.0958416	362	0.049799			362	0.970982	0.0794924			362	-0.00149686	0.0828533
	363	0.627861	363	-0.0895798			363	0.265504	-1.10104			363	0.0764747	-0.197525
	364	1.07709	364	0.0520554			364	0.560734	0.630272			364	-0.139355	1.08053
	365	0.523594	365	0.00140921			365	-0.517455	1.75563			365	0.0689779	0.108115
	366	-0.178426	366	0.374129			366	0.180503	-0.0791077			366	0.704021	-0.0912237
	367	0.0395615	367	0.0100715			367	-1.57779	2.9258			367	-0.686089	0.843745
	368	-0.969009	368	0.0169297			368	-2.34483	2.581			368	-0.114136	0.200967
	369	-0.170511	369	0.0362187			369	-0.154493	-1.75911			369	-0.0489234	0.223651
	370	0.207576	370	-0.392051			370	0.0722994	-1.26354			370	1.22115	-2.63087
	371	0.201227	371	0.113008			371	-0.602064	-1.39794			371	-0.330777	1.30719
	372	0.130282	372	0.194371			372	0.122042	0.0326155			372	-0.3459	0.381652
	373	0.277418	373	-0.0602931			373	0.409047	-0.444175			373	0.539534	-1.08925
	374	0.308064	374	-0.188304			374	0.564987	-2.56499			374	-0.49035	-1.11247
	375	0.233291	375	0.15105			375	-1.08037	2.50293			375	-0.51553	0.48606
	376	-0.444754	376	0.023048			376	0.13358	0.936061			376	0.281988	0.316898
	377	0.225774	377	-0.845401			377	-1.62324	2.83452			377	0.612071	0.113447
	378	0.233364	378	0.0800427			378	0.192253	-0.305472			378	0.168393	-0.327514
	379	-0.417952	379	-0.380733			379	-0.480245	1.3698			379	-2.47561	2.02579
	380	-0.661564	380	0.0306445			380	-0.668688	0.0380983			380	-0.361417	0.596935
	381	0.0928758	381	0.39403			381	1.79335	-2.80993			381	-0.0783922	-0.263469
	382	0.764195	382	0.0785817			382	-0.422173	2.08894			382	1.72614	-0.797999
	383	-0.528699	383	0.00175515			383	-0.0850029	1.30401			383	-0.451587	0.431154
	384	0.332543	384	0.0556224			384	0.795669	1.03373			384	0.295756	0.402587
	385	-0.129623	385	-0.0348046			385	0.640389	0.816938			385	0.121889	0.122922
	386	0.512585	386	-0.0161042			386	-0.253028	1.56483			386	0.151121	0.128483
	387	0.212721	387	0.0403976			387	-0.271751	0.0349288			387	-0.0889172	0.462761
	388	-0.391244	388	0.11539			388	1.63909	-1.35026			388	0.202611	0.368312
	389	0.261887	389	-0.0040758			389	0.202834	0.0986127			389	0.0393522	0.126905
	390	0.278123	390	0.337925			390	0.920966	-0.880273			390	-0.296454	0.337898
	391	0.280771	391	0.136211			391	-1.04419	1.52996			391	0.0413501	0.157854
	392	0.397358	392	-0.0958386			392	-0.795698	0.929941			392	-0.255754	0.943721
	393	0.2174	393	0.190068			393	1.22573	-3.15068			393	-0.0882179	-0.68667
	394	0.194165	394	0.200419			394	-0.08398	0.416737			394	0.159226	1.25971
	395	0.0210875	395	-0.126474			395	0.174165	0.620347			395	-0.526415	0.176526
	396	0.445912	396	0.0347148			396	-0.0120455	0.219634			396	-0.817511	0.0841945
	397	0.100445	397	-0.0646765			397	0.073721	-0.395106			397	0.981503	-1.0834
	398	-0.0826434	398	0.142949			398	-0.766358	2.35099			398	0.212543	-0.275198
	399	0.211566	399	-0.130782			399	0.253587	-0.81189			399	0.244034	-0.464875
	400	0.0432072	400	0.0791094			400	0.224461	0.75512			400	0.129675	-0.0350167
	401	-0.0935904	401	0.108457			401	-0.0179963	-0.296627			401	0.336776	0.343323
	402	0.217956	402	0.101593			402	-0.298498	0.155722			402	1.16187	-2.92436
	403	0.114906	403	0.139926			403	-0.451328	1.94431			403	-0.0223015	0.129263
	404	0.17985	404	0.0450446			404	0.0226411	-0.0280966			404	-0.0719848	0.0550036
	405	-0.0409335	405	0.399462			405	0.166671	-0.366543			405	0.183527	0.339873
	406	-0.0352945	406	0.0127793			406	-0.226368	-1.69082			406	0.205758	1.00932
	407	0.135891	407	-0.0834056			407	-0.503121	1.04462			407	-0.292903	1.3446
	408	0.0157393	408	0.0276802			408	0.277176	-0.345193			408	-2.69202	0.790264
	409	0.828704	409	-0.0634776			409	0.491916	-0.8838			409	-0.983075	1.56326
	410	0.868189	410	-0.0387847			410	0.128695	-0.0384581			410	1.49835	-0.705993
	411	0.239026	411	-0.0666628			411	-0.0202857	-0.199206			411	1.1451	-0.634425
	412	0.837799	412	-0.0322839			412	-0.0702873	0.328685			412	-1.29114	-0.218447
	413	0.0083698	413	0.366326			413	-0.142453	0.0503019			413	-0.270002	0.45034
	414	0.406945	414	0.20341			414	-1.09279	1.71226			414	-0.105588	1.60226
	415	0.345037	415	-0.0754228			415	-0.0544001	0.0114583			415	0.025235	0.0784361
	416	0.545893					416	-0.869254	0.392213
	417	-0.063289					417	-0.135209	0.676495
	418	0.17142					418	0.305921	-0.0911256
	419	0.113785					419	0.0473225	1.29741
	420	0.0269393					420	0.196994	-0.481837
	421	-0.182076					421	-0.151496	0.195422
	422	0.431107					422	0.0251841	0.163632
	423	-0.217843					423	-0.78464	1.52278
	424	0.170482					424	-0.129964	1.00214
	425	0.475741					425	-0.656767	1.72294
	426	0.118665					426	0.0178449	0.351416
	427	0.643363					427	-0.948086	0.438798
	428	0.0352821					428	-0.237501	0.761126
	429	0.239233					429	-0.016827	0.817453
	430	0.289715					430	-0.238475	0.538466
	431	0.591485					431	-0.51555	1.25363
	432	0.197362					432	0.0675601	0.837901
	433	0.886867					433	-0.0992893	-0.0317544
	434	0.367926					434	-0.146824	0.554886
	435	-3.90155e-05					435	-0.633494	-0.296702
	436	0.277145					436	-1.30736	1.32534
	437	0.643702					437	0.603297	1.1834
	438	-0.0392962					438	0.20583	-0.157958
	439	0.404532					439	-0.27241	-0.215533
	440	0.0524059					440	-0.594049	0.19212
	441	0.210446					441	0.441416	-0.0325266
	442	0.824278					442	0.0333672	-0.0285134
	443	-0.665893					443	-0.0169961	0.30587
	444	-0.0119461					444	-0.0311069	0.324222
	445	0.000791135					445	-1.13843	0.0126699
	446	0.363918					446	0.269949	0.417754
	447	0.426572					447	0.144693	0.162689
	448	1.07216					448	-0.0235844	-0.29116
	449	0.838663					449	-0.102291	-0.302091
	450	0.0536798					450	-0.020233	0.425555
	451	0.131607					451	0.101253	0.790183
	452	-0.00331676					452	-0.122302	0.185312
	453	0.0578434					453	-0.60967	1.41442
	454	0.927674					454	-0.218727	0.151846
	455	0.414879					455	-0.305614	0.382567
	456	0.11322					456	-0.585027	0.516294
	457	-0.0650206					457	0.120878	1.296
	458	0.656343					458	-0.13073	0.76629
	459	-0.0888207					459	-0.0576236	-0.507187
	460	0.305143					460	-0.0696416	0.806218
	461	-0.236234					461	-0.17642	0.841132
	462	1.3167					462	0.459208	-0.625898
	463	-0.175864					463	-0.0493748	-0.317258
	464	-0.0144705					464	-0.0640362	-0.0558387
	465	0.109692					465	-0.309036	2.30904
	466	0.0883753					466	-1.00481	1.13098
	467	-0.0166567					467	0.237264	0.00332984
	468	1.02628					468	-0.717925	0.707519
	469	-0.129398					469	-0.0224179	0.142746
	470	0.341401					470	0.528232	-0.173549
	471	0.448201					471	-0.133287	0.214431

## Sheet: Figure 4
	Figure 4c																																											Figure 4d
	ΔF/F for Go stimulus when d'= -0.65																																											Example MD neuron
	Time from cue onset (ms) Trial #	-900	-800	-700	-600	-500	-400	-300	-200	-100	0	100	200	300	400	500	600	700	800	900	1000	1100	1200	1300	1400	1500	1600	1700	1800	1900	2000	2100	2200	2300	2400	2500	2600	2700	2800	2900	3000			Learning phases	β of pref cue	Linefit of pref cue	β of nonpref cue	Linefit of nonpref cue	Cue SI
	1	0.00267975	-0.00455235	-0.00885718	-0.00265823	0.00113002	-0.0178112	0.00336853	0.0111172	-0.000936299	0.00354072	0.00801774	0.0221376	0.0524435	0.0238595	0.0295419	0.0634639	0.0379793	0.0541655	0.0288531	0.0204156	0.0200712	-0.00541332	0.0238595	0.0607088	0.0627751	0.0758618	0.0572649	0.064497	0.084127	0.0972137	0.0941142	0.109267	0.080511	0.100313	0.0643248	0.064497	0.0731067	0.109439	0.0861934	0.0870543			Early	0.00433634	0.0034	0.0101	0.0121	-0.4866
	2	-0.00268466	0.0158555	-0.00176683	0.00374016	-0.00452032	0.00484156	0.00814575	-0.010578	-0.00984374	0.00410729	0.000803102	0.013102	0.00777862	0.0386177	0.022831	0.0202611	0.030908	0.0189762	0.0176912	0.0158555	0.0160391	0.0030059	0.00575939	0.00557582	0.00777862	0.0611964	0.0107157	0.0725775	0.0819394	0.079553	0.0900163	0.112044	0.107455	0.116083	0.0878135	0.0859778	0.0668869	0.0391684	0.0235653	0.0274202			Middle	0.0135	0.0155	0.0082	0.0041	0.4463
	3	-0.0200005	-0.0403446	-0.0134024	-0.0396114	-0.0247657	-0.00258883	-0.000389471	0.0216042	0.0487296	0.0538615	0.0518454	0.050929	0.0534949	0.0525785	0.0388325	0.0369997	0.00162661	-0.0223831	-0.00790396	-0.00442164	0.00309285	0.00254301	0.00309285	0.0245366	0.0293019	0.0314097	0.0344338	0.073839	0.078421	0.113611	0.116177	0.143669	0.147884	0.125341	0.13817	0.11581	0.099315	0.107929	0.0494628	0.054228			Late	0.0285227	0.0275	-0.006	-0.0039	2.9305
	4	-0.00535574	-0.016575	-0.0133833	-0.00419513	-0.00361482	-0.00999819	-0.00206734	0.00895847	0.0128272	0.0244333	0.00122106	0.0406819	0.00973221	0.0441637	0.0638941	0.070084	0.0698906	0.0782083	0.102968	0.0913619	0.154422	0.150553	0.211485	0.228314	0.274739	0.275319	0.265067	0.222124	0.22754	0.225509	0.288666	0.273578	0.238953	0.265454	0.208197	0.178795	0.133337	0.13295	0.103355	0.108965
	5	0.00247252	0.0077658	-3.4824e-05	-0.0148931	-0.0128501	0.0445401	-0.00894982	0.0181666	-0.0345804	-0.000220553	0.0307962	0.00720861	-0.00486378	-0.00542097	-0.0024493	-0.00486378	-0.0150789	-0.0126644	-0.012943	-0.0122929	-0.0164718	0.0605128	0.0527122	0.0924582	0.127004	0.157649	0.158206	0.153192	0.163035	0.159135	0.169722	0.170836	0.164335	0.151149	0.154492	0.11066	0.113817	0.11846	0.104716	0.0945013
	6	0.0158171	0.0154392	0.0182735	0.0082589	-5.50803e-05	-0.00988069	-0.00742429	-0.0355784	0.000322827	0.00189743	0.00322006	0.00315714	0.00334609	0.00476325	-0.00704638	-0.0132819	-0.0219738	-0.0212179	-0.0123371	0.0146833	0.0127938	0.0328229	0.036602	0.036791	0.057009	0.0747707	0.0660788	0.0947999	0.114073	0.115396	0.116152	0.125033	0.104814	0.0993348	0.0585207	0.0415148	0.0154392	0.0114711	0.0101484	0.00910919
	7	-0.00215852	0.00972496	-0.0207265	-0.0147847	0.00972496	-0.0051294	0.0191946	-0.0121852	-0.023326	0.0229082	0.0535453	0.0318208	-0.00401532	0.0151097	0.0119531	0.0227225	-0.0125566	0.0104677	-0.00977138	-0.0207265	-0.0188697	0.00229778	0.0119531	0.0383196	0.0461181	0.0314495	0.0591157	0.111106	0.115934	0.173123	0.213972	0.208031	0.227156	0.259278	0.248509	0.254079	0.23384	0.221214	0.213601	0.180921
	8	0.0055109	0.0377044	-0.00575683	-0.0155937	-0.00128551	0.00157614	0.012039	-0.00879733	-0.0191708	-0.0039683	0.00980337	0.0162421	0.0140958	0.0119496	-0.000927799	-0.00665109	-0.015236	0.00264926	0.0140958	0.0162421	-0.0136264	-0.00629339	-0.00754536	-0.00611453	-0.0141629	-0.00414715	0.0548743	0.0541589	0.0588091	0.045574	0.019998	-0.0281134	-0.00200092	-0.0345521	-0.0281134	-0.0284711	-0.0308857	-0.0245364	-0.0216747	-0.0111224
	9	-0.0062405	0.0104613	0.00174734	0.000658089	-0.0162253	-0.0207638	-0.0154991	-0.0115052	0.000295005	0.0523975	0.0580253	0.056936	0.11866	0.0331541	0.048222	0.0373295	0.028434	0.0344249	0.0311571	0.0431389	0.0275263	0.0329725	0.0518529	0.0298863	0.0605669	0.043865	0.0235323	0.0690993	0.0907028	0.0930628	0.104318	0.0805365	0.0665577	0.0562099	0.0425942	0.0380557	0.026437	0.0356956	0.0616561	0.0336987
	10	0.00530381	-0.0370362	-0.000124396	0.00349441	-0.00175286	0.00494193	0.00403723	0.00195642	0.000599364	0.00458005	0.00783697	0.0112748	0.0281023	0.0324448	0.016703	0.0393206	0.0239407	0.00421817	0.00277065	-0.0167709	-0.0156853	-0.0167709	-0.01659	-0.0187612	-0.0203897	0.00277065	0.0262929	0.0226741	0.0588621	0.0476438	0.0943264	0.0852794	0.104278	0.110611	0.110068	0.106268	0.100478	0.059224	0.0740611	0.0273785
	11	0.0134425	0.0115431	0.0196832	0.0213112	0.00738262	0.00864886	-0.00708867	-0.0300618	-0.00546065	-0.0213791	0.00213678	-0.0121536	-0.0155906	-0.00645555	-0.00690778	0.00720173	-0.0193893	-0.0376593	-0.0278911	0.000689647	-0.00319951	0.0111813	-0.000214808	-0.000938373	-0.00799313	0.0435608	0.026738	0.0285469	0.0437417	0.0504347	0.100542	0.0893263	0.111757	0.111757	0.11248	0.124419	0.112119	0.0683429	0.0538716	0.0368679
	12	-0.0267407	0.0230221	0.0150889	0.0183343	0.0202274	0.0259069	0.00372996	-0.0314285	0.00210726	-0.0155621	-0.0242165	-0.0280028	-0.023315	-0.0238559	-0.0177257	-0.0166439	-0.0157424	-0.0159227	-0.0137591	-0.0440495	-0.0418859	-0.0353951	-0.0483767	-0.0609977	-0.0404435	-0.0222332	-0.0335921	0.00174666	0.00679506	0.025366	0.0817998	0.139856	0.166361	0.114614	0.137693	0.08793	0.108124	0.0477231	0.0313159	0.00787686
	13	0.026365	0.0274139	0.05049	0.0139528	0.0181484	-0.00772483	-0.011396	-0.034647	-0.0234586	-0.054052	-0.0710095	-0.0493319	-0.0315003	-0.0430384	-0.0428635	-0.0482829	-0.070485	-0.0622685	-0.0706598	-0.0675131	-0.0725828	-0.0710095	-0.0694361	-0.0649782	-0.0587721	-0.0400664	-0.0377938	-0.0283535	-0.0437376	-0.011396	0.0235678	0.00870819	-0.00842411	0.00171542	-0.0122701	-0.0138435	-0.023983	-0.0523038	-0.0619189	-0.0608699
	14	-0.013179	0.0408204	0.0117292	0.00773628	-0.000534766	0.00545461	0.00431378	-0.00804525	-0.0124184	-0.0150804	0.000891276	0.000986346	0.00241239	-0.0194536	-0.0285803	-0.0512068	-0.0383724	-0.0382773	-0.0356154	-0.0291507	-0.00443261	0.0316938	0.0488063	0.083982	0.114594	0.129615	0.13627	0.170875	0.16327	0.165266	0.160038	0.162509	0.126003	0.123721	0.124672	0.0986227	0.0792285	0.0535598	0.0469049	0.0126799
	15	0.0129156	0.0200605	0.0301365	0.00540442	0.00192361	0.00577082	-0.0173124	-0.0314189	-0.0129156	-0.00540441	0.00943483	0.0387469	0.00503801	0.0187781	-0.0118164	-0.0136484	-0.0182285	-0.0400293	-0.0242741	0.000641202	0.0145644	0.0229917	0.0469909	0.10873	0.133645	0.152331	0.0885774	0.107081	0.0764862	0.109646	0.105981	0.110562	0.129431	0.0871118	0.0748374	0.0504717	0.0171292	0.00412201	0.00283961	-0.0250069
	16	-0.0135037	-0.00507852	-0.0179971	-0.0106953	-0.0176227	-0.00545297	0.0166398	0.0218821	0.0203843	0.011023	-0.000585083	-0.00545297	0.0170142	-0.0355964	-0.0249245	-0.0414005	-0.0541319	-0.0537574	-0.0238012	-0.0181844	-0.0131293	-0.0533829	-0.0346603	-0.0146271	0.0173887	0.0175759	0.0113974	0.0484683	0.0611997	0.0731821	0.0922792	0.130848	0.0965855	0.0874114	0.122235	0.0761778	0.0984577	0.0958365	0.110627	0.0653186
	17	-0.0198061	-0.0115039	-0.0175098	-0.0115039	0.0273576	0.0160525	0.0165824	-0.010444	-0.00832432	0.0114597	0.0149926	0.0188788	0.0072203	0.0377796	0.0335402	0.0566804	0.0476716	0.0439621	0.0847667	0.0914792	0.0890062	0.062333	0.0520877	0.0529709	0.0552673	0.0384862	0.0718718	0.0718718	0.0863565	0.0831769	0.0540308	0.0563271	0.0960719	0.0962485	0.0937755	0.0845901	0.049968	0.0388395	-0.00373159	-0.0270485
	18	0.00356318	0.0047725	0.0201481	0.0407066	0.0065001	0.00339042	-0.00179239	-0.0256333	-0.0163042	-0.0190684	-0.0125035	-0.0126763	-0.012849	-0.0249422	-0.0349623	-0.0138856	-0.00853003	-0.0439458	-0.0280519	0.0113374	0.0153109	0.0179023	0.0099553	0.0206664	0.0289589	0.0413976	0.0410521	0.0204937	0.0507267	0.0761224	0.0690392	0.0773317	0.0431252	0.118103	0.117758	0.0714579	0.0788866	0.056255	0.0324141	0.0232578
	19	-0.00898448	-0.00825846	0.0176967	0.00335784	-0.0149741	0.011344	0.0133406	0.00444686	0.00408386	-0.0167892	-0.029676	-0.0229603	0.00698793	-0.00843997	-0.0153371	0.00480987	0.0409293	-0.00245031	0.0273165	0.0309465	0.0616208	0.086487	0.0356657	0.0509121	0.0578092	0.0632544	0.0647064	0.0512751	0.0512751	0.0988293	0.0601688	0.0385697	0.0529994	0.0632544	0.0579907	0.0313096	0.00136129	-0.0153371	-0.0267719	-0.0347581
	20	0.0104656	0.0365722	0.0079923	0.0101908	0.00139694	-0.0227861	-0.0136259	-0.0134426	-0.00428241	-0.00263357	0.0076259	0.0079923	0.0204502	0.0700987	0.0836558	0.100327	0.132938	0.134037	0.138068	0.140266	0.128175	0.121579	0.12561	0.117732	0.152724	0.165915	0.121579	0.156205	0.136602	0.156205	0.12561	0.113885	0.112785	0.133304	0.107289	0.0787093	0.0741292	0.0462821	0.0402363	0.0452745
	21	0.00458477	-0.00988823	0.00398999	-0.0126639	-0.00850041	-0.0102848	-0.000569998	-0.020396	-0.000768259	0.0376942	0.0396768	0.0670368	0.0698124	0.0767515	0.0828976	0.0595029	0.0579168	0.0539516	0.0470125	0.072588	0.0692176	0.0507794	0.0932071	0.0981636	0.118584	0.103913	0.113826	0.113826	0.174097	0.163193	0.162598	0.163788	0.147332	0.142772	0.14535	0.10312	0.0694159	0.0670368	0.0575203	0.0648559
	22	0.0336036	0.00586254	0.0253212	0.0118498	0.000873144	-0.0264688	0.000873144	-0.0146938	-0.0270675	-0.0280654	-0.0212798	-0.017887	-0.0312586	-0.0302607	-0.0490208	0.012249	0.0391917	0.0078583	0.0389921	0.0369964	0.0357989	0.046576	0.0615442	0.0595485	0.0553574	0.0509667	0.070126	0.0826993	0.0982662	0.101659	0.132394	0.161133	0.151952	0.0860921	0.151952	0.0848946	0.0914806	0.101659	0.0361981	0.0391917
	23	0.0149331	0.0442555	0.0363101	0.0298781	-0.00965984	-0.0026603	-0.015146	-0.0147676	-0.034442	-0.0301855	-0.0397389	0.00377171	-0.0143893	-0.015146	-0.0255507	-0.02801	-0.0673587	-0.0374688	-0.0308476	-0.00228194	-0.0229022	-0.00720054	-0.00738972	-0.00322783	-0.000390177	0.0105821	0.0438772	0.0414179	0.0226894	0.0652541	0.105549	0.100252	0.100819	0.113494	0.109143	0.0919281	0.0743346	0.0525793	0.0196626	0.0380127
	24	-0.0124388	-0.0116652	0.0113509	0.00806286	-0.00373527	0.0127047	0.0110607	0.0194742	-0.0135993	-0.0234633	-0.0209489	-0.0166939	-0.00547597	-0.0128256	-0.00315503	-0.00160774	0.0353339	0.0564158	0.0453914	0.0482925	0.0693744	0.0154125	0.0722756	0.156216	0.14113	0.159118	0.129526	0.12353	0.0827199	0.153122	0.172656	0.13146	0.163566	0.105542	0.0678271	0.0633787	0.039589	0.0111574	0.0107706	0.00941674
	25	-0.0116868	-0.0116868	-0.00491618	-0.000336042	0.00354711	0.0104173	-0.00810236	-0.00461747	-0.0110894	0.0321232	0.00444323	0.0092225	0.049448	0.0140018	0.0104173	0.00842595	-0.00212827	-0.022241	-0.0489253	0.00523977	0.0392921	0.0414826	0.0110147	0.0257508	0.0594048	0.0496472	0.0777254	0.0777254	0.0856908	0.0940545	0.111778	0.132488	0.132886	0.131094	0.113172	0.0884787	0.10421	0.0934571	0.0781236	0.0751366
	ΔF/F for No-Go stimulus when d'= -0.65
	Time from cue onset (ms) Trial #	-900	-800	-700	-600	-500	-400	-300	-200	-100	0	100	200	300	400	500	600	700	800	900	1000	1100	1200	1300	1400	1500	1600	1700	1800	1900	2000	2100	2200	2300	2400	2500	2600	2700	2800	2900	3000
	1	0.00352926	0.00213498	-0.0107621	0.0178206	-0.00152499	0.00875779	0.00980349	-0.0147706	-0.00413925	0.00143785	0.00945493	0.0246177	0.0193891	0.0178206	0.0190406	0.012592	0.0455318	0.0568603	0.0739401	0.0586031	0.0690602	0.127968	0.117511	0.0833515	0.131803	0.159688	0.130408	0.162651	0.173282	0.184436	0.190885	0.163871	0.162825	0.190362	0.195591	0.207791	0.161779	0.143131	0.165614	0.134243
	2	0.00657063	0.00502192	-0.00809657	-0.0131982	0.00611513	-0.0113762	-0.014838	0.00593293	-0.00117292	0.0146786	0.0356317	0.0206912	0.0174116	0.0471104	0.0704322	0.116165	0.0574959	0.0819108	0.0961225	0.134385	0.159711	0.18285	0.210909	0.201435	0.184308	0.153334	0.122724	0.133292	0.13402	0.167181	0.209634	0.200342	0.189045	0.178842	0.133292	0.112156	0.104686	0.104868	0.145681	0.12236
	3	-0.0194327	0.00589061	0.0105863	0.013605	-0.0137308	-0.00484246	0.0206486	0.000356372	-0.0182588	0.00337505	0.0662642	0.0233319	0.026686	-0.00836425	0.011928	-0.00853196	-0.0155755	0.020984	0.0310463	0.0166237	-0.00467476	0.0223256	-0.0160787	-0.0115506	-0.00786114	-0.0253024	-0.0216129	-0.00266231	-0.0185942	0.0169591	0.0223256	0.0199778	0.0177976	0.020984	0.0240027	0.000859485	0.00387816	0.0013626	0.00186571	-0.0568308
	4	-0.0514212	-0.00498482	-0.0161508	-0.0134923	-0.00622549	-0.0347608	-0.00782064	0.0182334	0.0407426	0.0696325	0.0598844	0.0620112	0.0559851	0.0216009	0.0368434	0.0233733	-0.00782064	-0.00569378	-0.0273168	-0.0237721	-0.0427366	-0.0322795	-0.0161508	-0.00250349	-0.0110109	0.0100804	0.0343621	0.0267408	0.0535038	0.094623	0.135742	0.138046	0.139287	0.146377	0.105966	0.0457053	0.0614795	0.0510224	0.0134479	-0.00498482
	5	-0.0167309	-0.00934623	-0.0363003	-0.0355618	0.0128078	0.00726929	-0.00823853	0.0176078	0.0261002	0.0366234	0.0515773	0.0831468	0.105855	0.100501	0.108624	0.100685	0.0968084	0.0885007	0.0801929	0.0766852	0.0805622	0.0877622	0.073916	0.087393	0.09847	0.102901	0.119516	0.123209	0.122655	0.133547	0.143332	0.163824	0.15404	0.160132	0.189301	0.197794	0.180348	0.169732	0.159024	0.159763
	6	-0.000967706	-0.0393159	-0.00222797	-0.0130303	-0.0202318	0.0222572	0.0089344	0.0125352	0.0179363	0.00803421	0.00173287	0.00686396	0.00533363	-0.00051761	-0.00240801	0.00641386	-0.0510183	-0.05894	-0.0573197	-0.0378755	-0.0551592	-0.0375155	-0.0361652	-0.0396759	-0.0249128	0.00407337	0.0276584	0.053944	0.0759086	0.0767188	0.0885113	0.124879	0.109576	0.103635	0.0816699	0.0798695	0.0924721	0.109936	0.110476	0.115517
	7	0.0133164	0.0179089	-0.00218352	0.00249106	-0.014075	-0.00341367	-0.00275759	0.00495136	0.00347518	-0.00948241	-0.0414663	-0.0296569	-0.0394981	-0.0475351	-0.0718101	-0.071318	-0.079847	-0.071318	-0.0952649	-0.121508	-0.110027	-0.112979	-0.101662	-0.0942808	-0.0949369	-0.109535	-0.0618048	-0.0534398	-0.0411383	-0.0437626	0.0036392	0.0152846	0.0302105	0.0270941	0.0566177	0.0336549	0.0574378	0.0362792	0.0221735	0.0320147
	8	0.00340714	0.00340714	-0.00576509	0.0124063	-0.000400203	-0.00247693	-0.00455366	0.00150347	-0.00143857	-0.000140612	-0.00109245	0.0350773	-0.0163218	0.0243475	0.0222708	0.0189826	0.0260781	0.0214055	0.0139639	0.0722854	0.0629401	0.0435573	0.0300585	-0.00386142	0.0435573	0.0264242	0.0397499	0.0689972	0.0525564	0.0733237	0.0888992	0.0779964	0.0754005	0.0345581	0.074016	0.0823229	0.0811115	0.0610364	0.0490952	0.0612095
	9	-0.00449853	0.00558514	0.00262958	0.011844	0.0271433	0.0184505	0.00593285	-0.0182332	-0.00797566	-0.026926	-0.0243182	-0.0479626	-0.0295338	-0.023275	-0.0406607	-0.0410084	-0.0457025	-0.0479626	-0.02936	-0.0344018	-0.0561339	-0.0469195	-0.00345539	-0.025709	0.00940998	0.0120178	0.0664349	0.0580898	0.0587852	0.0683473	0.0843421	0.0991198	0.111811	0.087993	0.0845159	0.0563512	0.043312	0.00680213	-0.000325981	0.0132348
	10	0.0430951	0.00507636	-0.0206727	-0.0232649	-0.0253386	0.0178645	0.0211479	-0.0109952	-0.008403	-0.002873	-0.00494675	-0.0320783	-0.0353617	-0.045212	-0.0718251	-0.0567904	-0.0664679	-0.0602467	-0.0918713	-0.0837492	-0.0849588	-0.0868598	-0.0445208	-0.0465945	-0.0281036	-0.00719331	0.00231136	0.0244313	0.0261595	0.0280604	0.0375651	0.0233945	0.0401573	0.0209751	0.0112976	0.0240857	-0.0132417	-0.0106496	-0.0363986	-0.0338064
	11	0.0209138	-0.00640614	0.0278891	-0.00756869	-0.020163	-0.020163	-0.0232631	0.0131635	0.00676944	-0.00485607	-0.0222943	0.00715696	-0.0106688	0.00599441	-1.211e-05	0.01917	0.0101602	0.00948206	0.0838853	0.0846604	0.130969	0.0943483	0.115662	0.17098	0.131162	0.138138	0.150926	0.169139	0.18774	0.164101	0.143369	0.159064	0.176308	0.160614	0.141819	0.133681	0.135231	0.15422	0.17844	0.15732
	12	0.0161456	0.00965873	0.0172903	-0.0063676	-0.0237295	0.00851399	-0.0185781	-0.0046505	-0.000643915	0.00794162	0.00736925	0.0283561	0.0264482	-0.00789392	0.012139	0.0195798	0.000500823	0.0268298	-0.0162887	-0.00903866	-0.0134268	-0.020486	-0.0101834	0.00107319	0.00393504	0.0357969	0.0371324	0.0752904	0.0291193	0.0983759	0.128139	0.105817	0.116692	0.10658	0.114784	0.114211	0.101047	0.11631	0.0920798	0.0779614
	13	-0.00512113	-0.0101575	-0.00415259	0.0235475	-0.0262352	0.0526035	0.00824465	-0.00463686	0.00650129	-0.0043463	0.0603518	0.0316832	0.0591896	0.0967687	0.077398	0.0897953	0.0543469	0.0514413	0.0485357	0.0479546	0.0384629	0.043693	0.0427245	0.0452427	0.048342	0.0824344	0.145583	0.133186	0.132798	0.17154	0.217448	0.22384	0.207569	0.161854	0.16476	0.122338	0.15643	0.1543	0.150232	0.149651
	14	-0.0117544	0.016747	-0.00593781	0.00899154	0.00627711	-0.0030295	-0.0175711	0.025472	-0.0111728	-0.00225394	-0.0061317	0.00705266	-0.0251327	-0.00884613	-0.0352149	-0.0235816	-0.0648797	-0.0425826	-0.0425826	-0.00574392	0.0126754	0.0175226	0.0467996	0.103609	0.0970166	0.101476	0.0838322	0.0960471	0.0950777	0.132498	0.147427	0.170694	0.166428	0.136957	0.149754	0.0977921	0.105935	0.114273	0.0935266	0.111752
	15	0.0120342	0.0399845	0.0262034	0.0306677	0.00562888	0.0108696	-0.0151398	-0.0361025	-0.0291149	-0.0188276	-0.0244565	-0.00465839	0.015528	-0.00863742	0.0147516	0.0163043	0.0491071	0.0306677	0.0349379	0.0628882	0.0862772	0.0667702	0.0751165	0.106366	0.131599	0.14441	0.11646	0.145963	0.15722	0.16052	0.186918	0.141304	0.142275	0.13354	0.108307	0.0745342	0.0646351	0.0456134	0.0240683	0.00931677
	16	-0.000350541	-0.000911407	0.0065668	-0.0282069	-0.00165923	0.00544507	0.00937113	-0.00371573	0.0159146	-0.00633311	-0.0207287	0.00694071	-0.0207287	-0.0096983	-0.0216634	-0.0480241	-0.0345633	-0.0341894	-0.0491458	-0.0353112	-0.0311981	-0.023346	-0.0285808	-0.00465051	0.00694071	0.00301465	0.0334884	0.0319927	0.0488187	0.0763011	0.102475	0.05181	0.0581664	0.100044	0.0894814	0.089201	0.0843402	0.030871	-0.0080157	-0.0182982
	17	-0.000747664	-0.00448598	0.00336449	0.0231776	-0.00672897	0.0216822	0.00672897	-0.00672897	-0.0250467	-0.0035514	0.0168224	0.0327103	0.0571963	0.0571963	0.00878505	0.0145794	0.0205607	-0.0108411	-0.0071028	0.0194393	0.031215	0.0242991	0.0515888	0.0521495	0.0343925	0.0362617	0.0250467	0.0439252	0.068785	0.091028	0.068785	0.0616822	0.0761682	0.0646729	0.0663551	0.101682	0.0824299	0.0588785	0.0370093	0.026729
	18	-0.0223496	-0.0196623	-0.0275451	-0.00497156	-0.00156761	0.0125857	0.00864424	0.0102566	0.00076141	0.0382049	0.0143772	0.023335	0.0039862	-0.0164375	-0.00389663	-0.0214538	-0.0286201	0.007211	-0.0314865	-0.0107045	0.00183634	0.00541945	0.00774847	0.0270972	0.0147355	-0.0103462	0.0143772	0.0167062	0.0451919	0.0813813	0.0853227	0.0742151	0.0684821	0.060241	0.0466252	0.0473418	0.0120482	-0.025037	-0.0200206	-0.0391902
	19	0.0219466	0.0130956	0.0204147	0.00458506	0.00339358	-0.00392549	-0.0134573	-0.0240104	-0.00358507	-0.0133722	-0.00801055	-0.0137977	-0.0136275	-0.00801055	0.00152126	-0.0267338	-0.00392549	-0.0086914	-0.0311592	-0.0311592	-0.0311592	-0.0498824	-0.0279252	-0.0173722	-0.0219679	0.00696801	0.00901054	0.0137764	0.0365847	0.0471378	0.0702865	0.0457761	0.0643291	0.0566696	0.055393	0.0542867	-0.00120211	-0.00698929	-0.00596802	-0.0372868
	20	0.0184957	-0.00298642	0.0174919	-0.0130248	-0.0310939	-0.0049941	-0.00660025	-0.00539564	-0.00138028	0.018295	0.0423871	0.035561	0.0688885	0.06668	0.0610585	0.0604562	-0.00258489	0.0431902	0.0638693	0.0652747	0.0702939	0.0700931	0.0931814	0.110447	0.123497	0.118478	0.0889653	0.109042	0.129119	0.14257	0.117474	0.120285	0.111451	0.119884	0.157628	0.132331	0.109644	0.0855522	0.132331	0.161844
	21	-0.0108147	-0.0402307	-0.0013939	-0.0136986	-0.0188897	-0.00562365	-0.00177842	0.00629656	0.0420572	0.035328	0.0705119	0.030906	0.0320596	-0.00869983	-0.00293199	-0.0144677	-0.0181206	-0.0186974	-0.0240807	0.00437395	0.0111031	0.0312906	0.0298486	0.0503244	0.0620524	0.0785869	0.0782024	0.0864696	0.107042	0.116847	0.108291	0.107426	0.101851	0.0874309	0.0760875	0.0628214	0.0606104	0.042634	0.00206681	0.0130257
	22	0.0194727	-0.00481029	-0.037119	0.0219421	-0.000282959	-0.00563344	-0.00254662	0.000128618	0.0186495	0.00527331	-0.00275241	-0.00583923	0.00424437	0.0237942	0.0328489	0.0886174	0.077299	0.133068	0.103023	0.11537	0.117222	0.11537	0.113106	0.0984952	0.142945	0.13492	0.128129	0.143666	0.144592	0.164553	0.196862	0.221968	0.158379	0.196039	0.196553	0.196862	0.195215	0.193158	0.1911	0.118662
	23	0.00964373	0.0356515	0.039145	0.0022684	-0.0210221	-0.0151995	-0.00665963	-0.0169463	-0.0155877	-0.00772711	-0.0183049	0.00925555	0.00964373	-0.00763007	-0.0287856	-0.0299501	-0.0297561	-0.0415954	-0.0512998	-0.0462535	-0.0334437	-0.0109296	-0.00801824	0.0306052	0.0383687	0.0333224	0.0511785	0.105329	0.137353	0.16899	0.162973	0.177335	0.145893	0.127261	0.0892196	0.0845615	0.0690345	0.0571952	0.0733045	0.0449677
	24	-0.00860619	-0.00326442	0.0129587	0.011376	-0.0022752	-0.0246315	-0.00722129	0.00168167	0.017707	0.00286873	0.017707	0.0155307	0.0458008	0.0521318	0.0268078	0.0232466	0.0307647	0.00504501	0.0562865	0.069542	0.0668711	0.0715204	0.0675636	0.073301	0.128104	0.138589	0.140766	0.154219	0.166881	0.126719	0.162528	0.162924	0.173014	0.165298	0.164903	0.167672	0.131863	0.129093	0.117024	0.102582
	25	0.0257038	-0.0222421	-0.0369367	-0.0147064	-0.00735909	-0.0233725	0.00206054	0.00488643	0.0271168	0.0282471	0.05839	0.0314498	-0.0018957	-0.0147064	-0.00396802	-0.0339225	-0.00227249	0.0101614	0.0032851	-0.0410814	0.0397391	0.00752393	0.00243733	0.0131757	0.0197695	0.0301311	0.0538685	0.0813739	0.0606507	0.0826926	0.111705	0.103604	0.101155	0.0938078	0.0649837	0.0427534	0.0418114	0.0229721	-0.0147064	-0.0167787
	ΔF/F for Go stimulus when d'= 0
	Time from cue onset (ms) Trial #	-900	-800	-700	-600	-500	-400	-300	-200	-100	0	100	200	300	400	500	600	700	800	900	1000	1100	1200	1300	1400	1500	1600	1700	1800	1900	2000	2100	2200	2300	2400	2500	2600	2700	2800	2900	3000
	1	-0.0124609	-0.0301616	0.0289702	-0.00448594	-0.0184908	0.0134092	-0.00720911	0.00942169	0.0025165	0.00912992	0.0196336	0.0400574	0.0616482	0.0622318	0.0678726	0.0204116	0.0213842	0.0165214	0.0143818	0.0184665	0.042586	0.0464763	0.0871294	0.0608702	0.12078	0.119418	0.0951044	0.104246	0.109109	0.120391	0.119029	0.142565	0.166393	0.142176	0.144316	0.146845	0.0859623	0.0785708	0.0519226	0.0589251
	2	-0.000528668	-0.00341231	0.0131206	-0.0153314	-0.0051425	-0.0191762	-0.0105253	-0.00994857	0.015812	0.0240784	0.0404191	0.0365742	0.0496468	0.0531071	-0.00860287	0.00735329	0.0185034	0.0115826	0.0127361	0.0504157	0.0296535	0.0681021	0.118854	0.104628	0.133849	0.119239	0.14846	0.132311	0.150382	0.15538	0.155669	0.141923	0.174028	0.152689	0.11847	0.144999	0.0921325	0.0748306	0.0584899	0.0502235
	3	-0.029075	0.000141369	0.00485368	0.00391122	0.00532491	0.00240328	-0.000989586	0.00579615	0.0220065	-0.00014137	0.0261533	0.021441	0.0140898	0.0122049	0.0150323	0.0163517	0.0093775	0.00768107	-0.00909476	0.00617313	-0.0183309	0.0163517	0.0124876	0.0191791	0.0184251	0.0265303	0.034824	0.048207	0.0917487	0.08534	0.10909	0.0974035	0.0949531	0.0989115	0.0606475	0.0646058	0.0378399	0.0453796	0.0129589	-0.0032515
	4	0.00294816	0.0172583	0.014255	0.00135814	3.31254e-05	-0.00358858	-0.0133054	-0.00782863	-0.00252857	-0.0023519	0.0126649	0.0116049	0.00842489	0.014785	0.0275051	0.0328052	0.0094849	0.0395186	0.0312151	0.0532987	0.0368685	0.0702589	0.0674322	0.0720256	0.0578921	0.0495887	0.0310385	0.0253851	0.050472	0.043582	0.0506487	0.0522387	0.0455253	0.0388119	0.0444653	0.0264451	0.0112516	-0.0148954	-0.0110087	-0.0212555
	5	-0.0222479	-0.0181839	-0.0198464	0.0167292	-0.0148589	-0.0176297	0.00970964	0.000473359	0.0366796	0.0379726	0.0839693	0.0682676	0.0743636	0.0562605	0.0490562	0.018207	0.00878601	-0.00876292	0.0490562	0.00749293	-0.0243722	0.00305952	0.00435259	-0.00451423	0.0473936	0.0377879	0.0477631	0.0385268	0.106875	0.0571841	0.0771344	0.0647578	0.0887722	0.0569994	0.0594932	0.0592161	0.0442533	0.0211626	-0.0113491	0.000658085
	6	0.0318038	0.0372797	0.0249591	0.0286748	-0.0125895	-0.0202166	-0.0190432	-0.0241279	0.00286015	-0.0253013	-0.0350796	-0.00320239	0.000904491	0.00761889	0.0250894	0.0302393	0.0054025	0.00872711	0.0220256	0.0728726	0.0449067	0.0615298	0.0693524	0.060552	0.100643	0.0867578	0.0826509	0.0932114	0.120199	0.115506	0.115506	0.0861711	0.0765884	0.0580096	0.0660278	0.0869533	0.0750238	0.0570318	0.0282837	0.0549784
	7	-0.00253764	-0.0239988	0.0274307	-0.0259323	-0.00930469	-0.00930469	-0.0127849	0.0127365	-0.00659787	0.0173768	0.0115765	0.0492786	0.0529521	0.0550789	0.045605	0.0440583	0.0158301	0.0305242	0.0156367	0.038258	0.0442516	0.0486986	0.0657128	0.115209	0.115982	0.0968412	0.114436	0.0965512	0.117142	0.115402	0.157165	0.151171	0.126036	0.113275	0.106508	0.0904609	0.0703531	0.069193	0.0158301	0.0390313
	8	-0.0181944	-0.01302	-0.0170446	-0.0367842	0.00806114	0.0241595	0.0209973	0.0099776	-0.0226023	0.0203265	-0.00458754	-0.00995365	0.00576138	0.0371914	0.0111275	0.015727	0.0161103	-0.01302	0.00231174	0.015727	0.0186017	0.0107442	0.0325919	0.0563561	0.047157	0.0674716	0.088936	0.0918107	0.0912358	0.0795453	0.123816	0.117683	0.115958	0.146047	0.141064	0.149496	0.155437	0.082995	0.109634	0.0703463
	9	0.0225222	-0.00279364	0.00689757	0.0142154	0.0296423	-0.0071448	-0.011496	-0.0233628	-0.0138693	-0.0194072	-0.0320651	-0.0144627	0.0213355	0.0250933	0.0466513	0.0466513	0.0428935	0.0862073	0.108556	0.118643	0.14653	0.144157	0.161561	0.228016	0.168879	0.219907	0.193404	0.197755	0.196371	0.200524	0.196173	0.168879	0.166902	0.145146	0.142179	0.145937	0.175406	0.121214	0.0767139	0.104601
	10	0.0775829	0.0614154	-0.00212668	-0.00776651	-0.0131243	-0.0134063	-0.0278819	-0.0342737	0.00877698	-0.024686	0.000505234	0.00652105	0.00388913	0.00200919	0.00887098	-0.00325465	-0.0165082	-0.0528851	-0.0109624	0.0151688	0.0319003	0.04036	0.0540836	0.0209966	0.0644233	0.073071	0.0640473	0.0578435	0.0535196	0.119318	0.0950663	0.0982622	0.0817187	0.0704391	0.0674312	0.072695	0.0595354	0.0228765	-0.00212668	0.0112209
	11	0.030614	0.0554027	0.00523041	0.00384224	-0.00389182	-0.0389926	-0.000322253	-0.0330433	-0.0100394	-0.00369351	0.0232766	0.0212935	0.00384224	0.00711435	0.0159391	0.0244664	-0.0108327	-0.0163853	0.00899829	0.0189138	0.0214918	0.0593689	0.0573858	0.0778117	0.141866	0.123225	0.101014	0.17538	0.17419	0.177958	0.180933	0.18708	0.167844	0.168836	0.163481	0.0867356	0.0970477	0.126397	0.0684911	0.0548078
	12	0.0306351	-0.000417639	0.0223805	0.0255251	-0.00336568	0.00626459	-0.0259673	-0.0201695	-0.0232158	-0.0075912	-0.00749294	-0.00690333	0.0125537	0.0406584	0.0754453	0.0561847	0.122024	0.149736	0.0992261	0.165852	0.145805	0.150915	0.155534	0.161528	0.176465	0.130475	0.127331	0.160742	0.165459	0.169783	0.149736	0.121435	0.105515	0.0624739	0.0899889	0.0868444	0.0660115	0.0567744	0.0451787	0.0434099
	13	-0.0194416	-0.0174347	0.00704914	0.00464089	-0.0142237	-0.0334897	-0.00800241	0.0237062	-0.00740035	0.0377543	0.102978	0.0383564	0.0624389	0.0560169	0.0644457	0.0664526	0.0247096	0.0102601	-0.00900584	0.0536086	0.0451797	0.0235055	0.0634423	0.0869227	0.0977598	0.101573	0.10552	0.108129	0.0953516	0.106389	0.108697	0.0945488	0.135489	0.136292	0.119033	0.146326	0.127662	0.120437	0.12104	0.103379
	14	0.0276372	0.0248063	-0.00501315	0.00480083	-0.00576807	0.000648761	-0.0125624	-0.0174694	0.0002713	-0.00208783	-0.00350331	0.00178114	-0.0231313	-0.0191679	-0.0197341	-0.0148271	-0.0162426	0.00933036	-0.0140722	-0.00878776	-0.0136948	0.00631067	0.0297132	0.0455666	0.0768959	0.0925605	0.075386	0.0584003	0.0644396	0.0734987	0.0863324	0.118039	0.0876535	0.0776508	0.0412258	0.0436793	0.0258443	0.0089529	-0.020489	-0.0193567
	15	0.00400482	0.0264121	-0.0189922	0.0146188	0.0179602	0.00911526	-0.0394339	0.00597037	0.00597037	0.00243237	-0.0172232	-0.0199749	0.00950837	-0.0178128	-0.0315717	-0.0105403	-0.0237095	-0.0219405	-0.0286234	-0.0254785	0.013636	0.0327019	0.0492125	0.0588438	0.068475	0.0711285	0.0751579	0.121545	0.116434	0.14582	0.143952	0.134124	0.107589	0.10582	0.106902	0.120759	0.0849856	0.0816442	0.0995307	0.0566817
	16	0.00801326	0.0349084	0.0135397	0.00948697	0.00930275	-0.0339873	-0.0203555	-0.00598692	-0.00303951	-0.00819748	-0.0509349	-0.0271714	-0.0284609	-0.00414479	-0.004329	-0.0314083	-0.0192503	-0.0516717	-0.0339873	-0.00672377	0.0107765	0.0385926	0.0494612	0.0594087	0.0728562	0.0582113	0.0599613	0.0352768	0.0680667	0.0308557	0.0704615	0.0702772	0.0533296	0.0385926	0.0271714	0.004329	0.000828958	-0.0107765	-0.00267109	-0.0273556
	17	-0.00266117	-0.0107166	0.00481887	0.00769581	-0.0057299	0.0215051	0.00616144	0.00270912	2.39745e-05	-0.0145525	0.00117475	-0.00381194	0.0192036	0.00433938	0.0199708	-0.0011268	0.0330129	-0.00189398	-0.0158951	-0.010333	0.034739	0.044137	0.0834552	0.137925	0.114718	0.0917024	0.0882501	0.0876747	0.0828798	0.0884419	0.118937	0.118554	0.115389	0.14809	0.0880583	0.0801947	0.0508499	0.0303277	0.0176692	0.0205461
	18	0.00865746	0.00641009	0.0341957	-0.00257936	-0.00870853	-0.00789131	-0.00666547	-0.015042	-0.0115688	-0.00462242	-0.00380519	0.00784023	0.0121307	0.0252062	0.0448196	0.0409378	0.0422658	0.0505401	0.0481906	0.0497229	0.029088	0.0693363	0.0828204	0.0766913	0.0750568	0.0895625	0.148607	0.14023	0.125725	0.1625	0.149628	0.132671	0.124295	0.0750568	0.101412	0.0934443	0.119595	0.0817989	0.110606	0.0619813
	19	-0.016626	0.00228508	-0.0288131	-0.0111628	-0.0101122	0.0207759	0.0033357	0.00963938	0.0506133	0.0113204	0.0136317	0.0377958	0.0422084	0.0373756	0.0541854	0.0493526	0.0388464	0.0413679	0.0272897	0.031282	0.0558664	0.0543955	0.0635358	0.0658472	0.0674231	0.109658	0.102303	0.118483	0.0854937	0.144748	0.137184	0.114491	0.140756	0.159457	0.135083	0.100622	0.0760381	0.0676332	0.0682636	0.0485121
	20	0.018866	0.00618641	-0.0154916	-0.0383966	-0.0181502	-0.0269441	-0.0118104	0.0268419	0.0360448	0.0112991	-0.00976533	0.0168209	0.0569047	0.06304	0.0728565	0.0634491	0.0920804	0.0978066	0.146684	0.0953525	0.0857406	0.0888082	0.0798098	0.115394	0.175929	0.159568	0.139118	0.160591	0.153024	0.167135	0.14239	0.16734	0.170817	0.202515	0.180019	0.165704	0.174089	0.154251	0.121121	0.095148
	21	0.00763832	0.0148637	0.0125929	-0.00289017	-0.00536746	-0.0396367	0.00681255	-0.00474814	-0.0450041	0.0194055	0.0119736	-0.010322	-0.0115607	0.0101156	-0.00763832	0.0222956	0.0227085	0.0222956	0.0514038	0.0850537	0.0885632	0.105285	0.127787	0.140999	0.166804	0.125723	0.136045	0.139761	0.131709	0.128406	0.160818	0.162675	0.125929	0.159372	0.112097	0.0739059	0.0817506	0.0739059	0.045417	0.0478943
	22	0.0136777	0.00423523	-0.0146497	0.0160846	0.0327478	0.0453378	-0.0277951	-0.013724	-0.01502	-0.0155755	-0.0168715	-0.0285357	-0.018723	-0.0131686	-0.0152052	-0.0157606	0.0179361	0.0734801	0.0644079	0.0257122	0.0257122	0.0246014	0.0164549	0.0181212	0.0664445	0.0386725	0.0745909	0.0364507	0.0231202	0.0220093	0.0112708	-0.00317064	0.0210836	0.0184915	0.0244162	0.0508922	0.0495961	-0.00076373	-0.0242773	-0.00798445
	23	-0.0286653	-0.0133141	-0.00963396	-0.00742591	0.00834593	0.0215943	-0.00364067	0.0136032	0.0337912	0.00266807	0.00519156	0.0302162	0.0375764	0.0518762	0.059657	0.0586055	0.0975094	0.14104	0.147348	0.166275	0.167957	0.151975	0.124637	0.153447	0.162489	0.183729	0.156181	0.183939	0.188565	0.166695	0.139988	0.145666	0.145035	0.136834	0.113281	0.121693	0.09078	0.0821581	0.0737465	0.0709075
	24	-0.0151732	-0.0330791	-0.0147568	-0.00975978	0.00648049	-0.00642844	0.0204305	-0.00163964	0.0489551	0.00481482	0.0066887	0.000442443	0.00981183	-0.00913515	0.0133514	0.028967	0.0264685	0.028967	0.0393775	0.0531192	0.0102282	0.0360461	0.080811	0.0735237	0.0672774	0.0870572	0.0797699	0.0687349	0.0593655	0.0558259	0.0980923	0.0847669	0.0899722	0.0806028	0.0576998	0.0231372	0.0356297	0.0610312	0.0427088	0.047914
	25	-0.0204652	0.0242546	0.0130746	0.0423145	-0.0024053	-0.00111531	-0.0025128	-0.00434029	-0.0118652	-0.0101453	-0.0140152	0.0186646	0.00619465	-0.00713527	0.00662465	0.0324245	0.0135046	0.0642443	0.0790793	0.0844542	0.0466144	0.0169446	0.0898292	0.110039	0.114339	0.114339	0.121004	0.117134	0.133474	0.172604	0.190449	0.159274	0.144009	0.0775743	0.0870342	0.0878942	0.0831642	0.0732743	0.0810143	0.0709093
	ΔF/F for No-Go stimulus when d'= 0
	Time from cue onset (ms) Trial #	-900	-800	-700	-600	-500	-400	-300	-200	-100	0	100	200	300	400	500	600	700	800	900	1000	1100	1200	1300	1400	1500	1600	1700	1800	1900	2000	2100	2200	2300	2400	2500	2600	2700	2800	2900	3000
	1	0.00265849	-0.0101789	0.000167653	-0.00481403	-0.00136517	0.00629895	-0.002898	-0.00519723	-0.00366441	0.0128135	0.0423203	0.0421287	0.0519005	0.0154959	-0.00490983	-0.002898	0.0116638	0.0438531	0.061289	0.0656959	0.0748928	0.0890714	0.109765	0.125476	0.142337	0.167724	0.166862	0.169736	0.177209	0.201734	0.20365	0.192154	0.157091	0.133907	0.116471	0.0783417	0.0781501	0.0848562	0.0281417	0.0338898
	2	0.0360956	0.0110104	-0.000391957	-0.000201917	0.00987018	-0.0269975	-0.0133146	-0.00742342	-0.0209162	-0.00628318	-0.019776	-0.0174955	-1.18775e-05	0.00093832	-0.0277577	-0.0171154	-0.034029	-0.00647322	-0.0300381	-0.0106541	0.00150844	-0.0304182	0.00473911	-0.00552302	0.00720963	0.0509187	0.0877864	0.0693526	0.156201	0.113252	0.170644	0.229556	0.163612	0.198769	0.157721	0.148789	0.147649	0.138432	0.123894	0.119523
	3	0.000652062	0.00888863	0.00962077	-0.0269862	-0.00520506	0.00632615	0.00467883	0.00641766	-0.0130756	-0.00374078	0.0178573	0.0185895	0.0220672	0.0189556	0.0522679	0.0744151	0.0680089	0.0616027	0.106629	0.134817	0.0714866	0.0813705	0.099857	0.101321	0.131888	0.0985758	0.109192	0.111388	0.114317	0.151839	0.136098	0.144701	0.131156	0.101138	0.117062	0.102969	0.0583081	0.0292055	0.0341475	0.0169422
	4	-0.0500892	-0.0246498	-0.00630577	0.0310746	0.038343	0.0161917	0.0163647	0.0069331	0.00580823	-0.0194581	0.00961549	0.00260667	0.0148072	0.0261424	0.0328051	0.0307285	-0.00422908	0.0144611	0.0222487	0.0362663	0.0229409	0.00096263	0.0298632	-0.000421827	0.0134227	-0.00388297	0.0109999	0.0101347	0.0418041	0.0386891	0.0405927	0.0556487	0.0495917	0.0182683	0.032286	0.0546103	0.00286626	-0.000248769	0.0099616	-0.00319074
	5	-0.0107754	-0.014213	0.0131112	0.00588352	0.00147639	0.0025341	0.00641238	-0.00592759	-0.00786673	0.0025341	0.0217492	0.0404354	0.0013001	0.0517177	0.042022	0.0792182	0.0557722	0.0369097	0.0369979	0.03832	0.0490734	0.0749873	0.0557722	0.0899716	0.0827439	0.0635288	0.0619422	0.0402591	0.0774553	0.0652916	0.0897953	0.0700513	0.0860933	0.0753399	0.0642339	0.0203389	0.0106432	0.00799894	-0.00187303	0.0013001
	6	-0.0420441	-0.0298675	-0.00751054	-0.00990593	0.00107293	0.019238	0.0210345	0.016643	0.0172418	0.012451	0.0148464	0.0162437	0.0260249	0.0168426	0.0113531	0.014048	-0.026474	0.0431919	0.0482821	0.0384011	0.00586371	-0.00591362	0.0344088	0.047783	0.0603588	0.0743319	0.0667465	0.0829154	0.0787235	0.0615565	0.115453	0.0978866	0.105971	0.12184	0.0964893	0.0743319	0.0757292	0.0793223	0.0364049	0.032213
	7	0.0065172	-0.00193755	0.00269243	-0.0337435	0.021011	0.0314788	-0.0053597	-0.0107949	-0.00958708	-0.00717143	-0.00837926	0.000880703	-0.00113233	0.0119524	0.0067185	-0.00918447	-0.0218666	-0.00395058	0.0191993	0.0161798	0.0204071	0.030271	0.0384238	0.041846	0.0463753	0.0741552	0.079389	0.0767721	0.0701291	0.0922725	0.121059	0.103948	0.104552	0.0946881	0.0803956	0.0878438	0.0693239	0.0689213	0.0801943	0.0663043
	8	-0.0268387	0.0328819	0.0118375	-0.0293034	-0.0281658	-0.00693185	0.00577062	0.013923	0.0275734	0.0113635	0.020369	0.0138282	0.0078561	-0.0129987	-0.00370884	-0.000865001	-0.025322	-0.0247532	-0.0148946	-0.0349911	-0.0145154	0.0325027	8.29455e-05	0.0302276	0.0355361	0.0326923	0.00861446	0.037432	0.0378112	0.0922233	0.0987641	0.0962047	0.0846397	0.0689038	0.0747811	0.0556326	0.040655	0.0467219	0.0594244	0.0110791
	9	-0.0283362	-0.0125899	-0.00826922	-0.0129739	0.00814921	0.00930138	0.00718906	-0.0104776	0.0434824	0.0181347	0.00238835	0.0252397	-0.000684101	0.0371455	0.0189028	0.0715186	0.00162024	0.0158303	0.0345531	0.0388738	0.0393538	0.0373375	0.0521237	0.0818881	0.152939	0.150346	0.152555	0.129127	0.161004	0.10858	0.158507	0.157547	0.118181	0.0573085	0.0987866	0.0980185	0.0959062	0.0916816	0.074591	0.080928
	10	-0.0342798	0.00358001	0.0271198	0.038105	0.0388897	0.00593399	-0.00995537	-0.00328576	-0.033299	-0.0256486	-0.0219214	0.0208425	0.0581139	0.0573292	0.0700799	0.0420283	0.0996028	0.10637	0.0947967	0.125987	0.140111	0.181698	0.144034	0.174047	0.166397	0.189348	0.187975	0.169732	0.175813	0.168555	0.166103	0.188367	0.181894	0.185229	0.13658	0.106763	0.108136	0.117356	0.108332	0.0714531
	11	0.0194321	-0.0159937	-0.000781453	-0.0222454	-0.0276635	0.0286012	-0.00619953	0.0127637	0.00734566	0.00359469	0.00609534	0.0356864	0.0619432	0.0925762	0.0748632	0.0765303	0.0584006	0.00859599	0.06882	0.0781974	0.0698619	0.0798645	0.0767387	0.144048	0.164053	0.153009	0.182808	0.184684	0.175306	0.173639	0.170096	0.1528	0.159469	0.1528	0.149987	0.131961	0.161761	0.170096	0.18906	0.166554
	12	-0.0314894	-0.00729137	-0.00148778	-0.00414366	0.0123818	0.0206445	0.0011681	-0.00552079	0.00136483	0.0196609	0.0135622	0.0113981	0.0241857	0.000184436	0.0271367	0.0438589	0.0407112	0.0446458	0.0249726	0.0436622	0.0637288	0.0749425	0.0798608	0.0597942	0.075336	0.101305	0.1076	0.13829	0.113108	0.131995	0.124716	0.143799	0.0922549	0.0957961	0.0792706	0.0509412	0.0816314	0.0908778	0.0800575	0.0595974
	13	-0.00760541	-0.0198134	-0.00484875	-0.0296586	-0.0074085	0.00932831	-0.000123065	0.00735928	0.0148416	0.0252775	0.0368948	0.0398484	0.0656428	0.0522533	0.0585542	0.0455586	0.0597357	0.0810013	0.0743065	0.0534347	0.0443772	0.0821827	0.0941938	0.0798198	0.103054	0.103054	0.103448	0.0977381	0.149524	0.155825	0.153659	0.141254	0.0932093	0.0920279	0.0817889	0.0833641	0.0724359	0.0634768	0.0329568	0.032366
	14	-0.026892	-0.00983052	-0.0211375	-0.00417703	-0.0265891	0.0289363	0.0248981	0.0020822	0.0317631	0.0242924	0.027321	0.0253019	0.0406471	0.0317631	0.00490895	-0.00135028	0.00288985	0.00914907	0.0106634	0.0248981	0.00288985	-0.022349	0.0349936	0.0515503	0.0600305	0.0636649	0.0668955	0.116364	0.106066	0.129286	0.120806	0.108893	0.136555	0.136555	0.129286	0.113335	0.114849	0.107681	0.104855	0.065785
	15	0.0217627	0.0210316	0.00458102	0.0162792	-0.00638602	-0.0019992	-0.00903639	-0.0195465	-0.00821386	-0.00492374	-0.00528931	0.00549494	0.0312675	0.0290741	0.0106129	0.00421546	0.0256012	0.0265151	0.0141772	0.0228594	0.0254184	0.0301708	0.0433312	0.0287085	0.057954	0.0250528	-0.0133318	0.0307191	0.0915862	0.0744045	0.0469869	0.0828126	0.0285257	0.0382133	0.0153653	0.00531216	0.000376992	0.0181984	0.00238762	-0.034352
	16	-0.0180048	-0.0159278	-0.00284286	0.0119037	0.011696	0.0160576	0.00338807	0.0124229	-0.00221977	-0.0115662	-0.0441747	0.0368274	0.0422276	0.0526124	0.0841825	0.0953982	0.0710976	0.0737976	0.089375	0.105368	0.107237	0.114506	0.134134	0.131953	0.178477	0.138599	0.138184	0.15023	0.136938	0.153346	0.136938	0.124476	0.12136	0.136938	0.0885442	0.11866	0.0864672	0.0978906	0.0974752	0.10246
	17	-0.0154128	0.00476397	-0.00440731	0.00720964	0.00354113	0.00109546	7.64272e-05	0.00394874	0.00191068	0.00476397	0.0157695	0.0581612	0.0924006	0.0826179	0.0500089	0.039411	0.0357425	0.0369653	0.0092477	-0.000127379	0.0591802	0.0606068	0.0744656	0.0736504	0.124194	0.140703	0.120526	0.119507	0.150282	0.174942	0.112374	0.125417	0.101164	0.157211	0.140703	0.139276	0.140499	0.133977	0.127048	0.124806
	18	-0.0147332	-0.0253187	-0.000279905	0.0178376	0.000737932	0.019059	-0.00150131	-0.0118833	-0.0159546	0.0298481	0.0589582	0.0591618	0.0624189	0.0622153	0.0734115	0.073208	0.0276088	0.0483727	0.0738187	0.108629	0.04023	0.0935647	0.101911	0.106186	0.103336	0.111072	0.144457	0.122675	0.111479	0.130818	0.135907	0.13835	0.0937683	0.0947861	0.0744294	0.0939719	0.0577368	0.0532584	0.0296445	-0.00699763
	19	0.00515227	-0.0107637	-0.016273	-0.0197419	-0.0148447	0.000255063	0.0235168	0.00841708	0.00637658	0.00596847	0.0112738	0.0557568	0.040657	0.0471867	0.0261695	0.0210682	-0.00096924	-0.0287201	-0.012192	0.0516758	0.0508596	0.0745294	0.0735092	0.0928939	0.118196	0.0800388	0.115339	0.116156	0.105545	0.107926	0.104389	0.107177	0.131664	0.152885	0.150436	0.109218	0.123093	0.132276	0.110034	0.147375
	20	0.0241837	0.0300526	-0.00310179	0.017697	0.0063709	-0.0514949	0.00204641	-0.0173108	0.0246985	-0.022665	-0.0218413	0.00369384	0.054764	0.0735035	0.0889481	0.0592944	0.0757687	0.0424083	0.0530136	0.0539403	0.0465269	0.0971852	0.0780339	0.0924489	0.132605	0.114689	0.0897718	0.150315	0.154433	0.191088	0.145578	0.148667	0.0875066	0.0980089	0.0667078	0.0354068	0.0372601	0.0553818	0.00987168	0.0133725
	21	-0.0312807	-0.0292642	-0.0403549	-0.0103093	-0.0218032	0.00219293	0.00783909	0.03486	0.0546215	0.0421193	0.060671	0.0445391	0.0231644	0.0409094	0.0723666	0.0868853	0.0697452	0.0925314	0.0816424	0.131248	0.0878935	0.0897084	0.10332	0.108058	0.105034	0.106042	0.126408	0.0997908	0.0937413	0.127417	0.122678	0.0957578	0.113906	0.142137	0.0981776	0.0655105	0.0564364	0.0574446	0.0437325	0.0340534
	22	-0.0225417	-0.0336088	-0.0295574	-0.0257037	-0.00198861	0.00986895	0.0252838	0.0183669	0.00828794	0.0310149	-0.00119811	0.0446511	0.0624375	0.0179716	0.0377342	0.0134262	0.014612	0.0379318	0.0314102	0.00235916	0.0165882	-0.026099	-0.0298539	-0.0087079	0.0442559	0.00769506	-0.00159336	0.0541372	0.0841763	0.0887217	0.0924766	0.0675757	0.0780499	0.0489989	0.0181692	0.0557182	0.0244933	-0.00060523	0.00196391	0.0110547
	23	-0.0166246	-0.00210438	0.00420875	0.0117845	0.0122054	-0.00968013	-0.0189394	0.00420875	-0.0151515	0.0225168	-0.00757576	-0.00420875	0.0185185	0.0296717	0.030303	-0.00673401	-0.00715488	-0.0361953	-0.0248317	-0.0648148	-0.0545034	-0.0382997	-0.0515572	-0.00925926	0.0147306	0.026936	0.030303	0.0717593	0.107323	0.0957492	0.0862795	0.0854377	0.0744949	0.0778619	0.050505	0.0374579	0.0568182	0.0258838	0.047138	0.0204125
	24	-0.0538726	-0.0208705	-0.0263383	0.0103742	-0.00485757	0.00373471	-0.000561427	0.0183806	0.0424	0.04943	0.0502111	0.0562648	0.0709107	0.072473	0.0285352	0.0107648	0.00432055	0.0154515	-0.016379	-0.0372739	-0.0419606	-0.0446945	-0.0583641	-0.051334	-0.0243855	-0.0603168	-0.0607074	-0.0259477	-0.0126687	0.00783557	0.0230673	0.0218957	0.0168184	0.00959309	0.00900725	-0.00954427	-0.00993483	-0.0550443	-0.0224327	-0.0417653
	25	0.00587934	0.0281281	-0.0071967	0.00861165	0.00392769	0.0027567	0.00568417	-0.00504989	-0.030031	-0.00797736	0.00939231	0.0211022	-0.0194921	-0.0169549	0.00597692	-0.0179308	-0.0237857	-0.0163694	-0.0319826	-0.027689	-0.045449	-0.0382279	-0.0198824	-0.0128565	0.0195409	0.0148569	0.0519382	0.0365202	0.0550609	0.0458881	0.0749677	0.078871	0.0505721	0.0749677	0.0659901	0.0109536	0.00744066	0.000805055	-0.00348857	-0.0321778
	ΔF/F for Go stimulus when d'= 0.69
	Time from cue onset (ms) Trial #	-900	-800	-700	-600	-500	-400	-300	-200	-100	0	100	200	300	400	500	600	700	800	900	1000	1100	1200	1300	1400	1500	1600	1700	1800	1900	2000	2100	2200	2300	2400	2500	2600	2700	2800	2900	3000
	1	-0.000503382	0.00401478	0.00421122	0.0163906	-0.0175938	0.00892583	8.59434e-05	-0.00128915	-0.000896266	0.000871711	-0.0295768	-0.00777173	-0.0437206	-0.0191654	-0.0242729	0.00853295	0.0106938	0.0112831	0.0313202	0.0226768	0.0448747	0.0364277	0.0328917	0.0281771	0.0238554	0.0287665	0.0289629	0.00735429	0.042321	0.0503751	0.0488035	0.0376064	0.0407494	0.0678584	0.0527324	0.0851453	0.0413388	0.0279807	0.0171764	-0.00325357
	2	-0.00328231	0.00620604	0.00179286	2.75824e-05	-0.00239967	0.0101779	-0.0207144	0.0152531	0.0119432	-0.00482692	-0.0114467	0.0187836	0.0401876	0.0291546	0.0243001	0.0115019	0.0589436	0.0507792	0.0799062	0.0821128	0.0924838	0.086526	0.118742	0.135071	0.121831	0.133085	0.133306	0.15493	0.163315	0.175231	0.1984	0.151841	0.15493	0.169494	0.145001	0.132864	0.148531	0.135733	0.148311	0.119404
	3	0.00331946	0.00869382	0.0167027	0.02429	0.00995837	-0.010696	-0.0154381	-0.0138574	0.00279256	-0.0132251	0.0103799	0.0556931	0.0360925	0.02429	0.0394647	0.0567469	0.0390432	-0.00605933	0.00384636	0.0204963	0.0228147	0.00447863	0.02429	0.0384109	0.0744507	0.058433	0.0984773	0.0961589	0.120818	0.121766	0.139154	0.0929975	0.0953159	0.0799304	0.100374	0.0723431	0.0710786	0.0788767	0.0550609	0.0559039
	4	-0.0013149	0.00216101	-0.0174139	-0.0318664	0.0191747	0.00728341	0.00810666	0.0107593	-0.0077179	-0.00424199	-0.0190604	-0.0253719	-0.0190604	0.00801518	-0.00460787	0.0164306	-0.0199751	-0.0428429	-0.0452212	-0.00113196	-0.00698613	-0.036257	-0.0371717	-0.0211642	-0.0128403	-0.0135721	-0.0146697	0.00929578	0.00289278	0.00179513	0.00517957	0.0142352	0.00142924	-0.0190604	-0.0253719	-0.0179627	-0.0470506	-0.0369888	-0.0768703	-0.0840051
	5	-0.0147774	-0.0127606	-0.0102637	-0.0131448	0.000300109	-0.0158338	0.0233485	0.00318116	0.00798291	0.0150895	-0.0335042	0.0114402	0.0195071	0.00894325	0.0173943	-0.00584613	0.032952	0.0321837	0.0350648	0.0644515	0.0490859	0.0473572	0.0406348	0.052159	0.0567687	0.0339123	0.0283423	0.0615704	0.0836584	0.099024	0.0963351	0.0913412	0.0938382	0.0832743	0.0387141	0.0652197	0.0546559	0.0433238	0.0371775	-0.00200473
	6	-0.00399551	-0.0130729	-0.0464855	-0.00187101	-0.00921019	-0.0138455	0.0251681	0.0125177	0.0112623	0.030769	0.0120348	0.0141593	0.00199172	-0.0221503	0.00817208	0.00739954	0.0149319	0.0440955	0.0757698	0.0811777	0.091607	0.0804051	0.0885168	0.0761561	0.0869717	0.0713277	0.0583876	0.0977874	0.0966286	0.0960492	0.0838816	0.0664993	0.0566493	0.0607052	0.0506621	0.0298034	0.032121	0.0093309	0.0162838	-0.0167425
	7	-0.00754578	-0.0332964	-0.0284418	-0.0244314	0.0177827	0.0253812	0.00659596	0.0034299	0.0528204	-0.00205794	0.0469105	0.0437444	0.00638489	0.0511319	0.0418448	0.0355126	0.0319244	0.0498654	0.063585	0.0891246	0.0760382	0.101789	0.0889135	0.0840589	0.0908132	0.0789932	0.0827925	0.0906021	0.114453	0.122896	0.117408	0.114875	0.108543	0.0979896	0.108121	0.107699	0.123107	0.104322	0.0650625	0.0737164
	8	0.0181041	0.00892822	0.0160187	0.00892822	-0.00358432	-0.00358432	0.0101795	-0.0108833	-0.0306948	-0.0216232	-0.0102577	0.0397925	0.042295	0.0229006	0.0387498	0.105275	0.0608553	0.106943	0.144272	0.16325	0.207252	0.208295	0.227689	0.215177	0.214551	0.199953	0.194531	0.181184	0.234988	0.237491	0.219139	0.281285	0.264601	0.243747	0.176596	0.182018	0.155116	0.106109	0.112782	0.109029
	9	-0.0112016	-0.0120181	-0.00997678	-0.0197749	0.00104616	0.0210508	0.0386058	-0.00497563	-0.00834375	-0.00395499	-0.010385	0.0167641	-0.00630247	0.0283994	0.0102319	0.0496287	0.013498	0.00676176	0.0359521	0.00308744	0.0407492	0.0549361	0.112704	0.12087	0.111684	0.134546	0.108418	0.162104	0.132097	0.136383	0.145569	0.102294	0.134546	0.152918	0.0947411	0.103927	0.0933122	0.0898421	0.0957618	0.0455462
	10	0.0208156	0.0344669	0.00326386	-0.0114709	0.00391392	0.00218042	-0.00692046	-0.00605371	-0.0214385	-0.0168881	0.0153984	0.0208156	0.00456398	-0.00410352	0.0448679	0.0279663	0.0515852	0.0799713	0.0769377	0.0153984	0.0578691	0.0934059	0.110308	0.0784545	0.0799713	0.139127	0.145844	0.148228	0.13241	0.133927	0.155812	0.156679	0.142377	0.110741	0.162963	0.119842	0.136093	0.150395	0.115075	0.147144
	11	0.00148773	-0.0145257	0.0159864	-0.000676242	0.00754686	-0.0275095	-0.00327301	-0.00781736	-0.0132273	0.0140388	0.0309178	0.0332982	0.0127404	0.0454164	0.0724661	0.122238	0.11185	0.0837188	0.0858828	0.0785253	0.0830696	0.0928075	0.108388	0.133707	0.166383	0.131543	0.11488	0.142363	0.191918	0.142146	0.160973	0.134356	0.116828	0.107523	0.106873	0.0941059	0.0746301	0.0720333	0.0694366	0.0754957
	12	-0.0174827	-0.0197385	-0.0121507	-0.0443476	-0.00538323	0.0192258	-0.00210202	-5.12688e-05	0.0315304	0.0438349	0.0635222	0.01697	0.0417842	0.00897206	0.0200461	-0.000871571	-0.00415278	0.0368623	0.00466547	0.0352217	0.0220969	0.0795181	0.04404	0.057575	0.0508075	0.056242	0.0491669	0.0488593	0.0503973	0.0627019	0.0532684	0.0643425	0.0329659	0.0270187	0.0540887	0.0339913	0.000358882	-0.00333248	-0.0394258	-0.0256857
	13	-0.0205641	0.000663359	-0.0241728	-0.0226869	-0.0120731	0.00490885	0.00554568	0.00384748	0.0303818	0.0407833	0.0392974	0.0377053	0.0367501	0.038236	0.0677422	0.0685913	0.0760209	0.0949134	0.131212	0.122085	0.174941	0.170483	0.213363	0.209754	0.219731	0.231088	0.238411	0.23321	0.221429	0.233953	0.215061	0.172606	0.184706	0.209117	0.157747	0.141189	0.149468	0.0947011	0.0785682	0.0777191
	14	-0.00376798	-0.00780131	0.036353	0.00281272	0.0119408	-0.0485591	-0.0152311	-0.0133206	-0.00482938	0.0132145	0.0287109	0.00111447	0.00684604	0.00705832	0.00557236	-0.0035557	0.021918	0.0478162	0.0217057	0.0588547	0.0425092	0.0775354	0.0989757	0.0906968	0.148437	0.117444	0.161598	0.163297	0.199809	0.147163	0.158202	0.151409	0.148013	0.131455	0.100886	0.118293	0.0745635	0.076474	0.0439951	0.0482407
	15	-0.0329612	0.00814429	0.0138652	0.0191623	0.00284719	0.00814429	0.0167256	0.00708487	-0.0121966	-0.0191887	0.0183147	-0.0153748	-0.0189769	-0.0170699	-0.0181293	-0.0232145	-0.0092302	0.041622	0.0161959	0.0352654	0.0539112	0.0666243	0.0496736	0.0469191	0.0382318	0.0384437	0.0564539	0.0859057	0.0750997	0.0986188	0.112179	0.13252	0.126587	0.0882365	0.0936395	0.0861176	0.0755234	0.083575	0.0606915	0.047131
	16	0.0291547	0.0300576	0.0035738	0.0280512	0.0400893	-0.0112732	-0.00685919	-0.0291296	-0.0353493	-0.0425721	-0.028929	-0.045381	-0.0409671	-0.0606292	-0.0447791	-0.047588	-0.0594254	-0.0734698	-0.0664476	-0.0598267	-0.0443778	-0.0333429	-0.0269226	0.0338696	0.0593502	-0.00685919	0.0549362	0.0290544	0.00718522	0.0515254	0.0942606	0.033669	0.0635635	0.0412931	0.0244398	0.0184208	0.0200258	0.0298569	0.0111979	-0.000639523
	17	0.0105975	0.0144883	0.000972713	0.00138228	0.000972713	-0.00926637	-0.0150003	-0.00988071	0.0230891	-0.00250858	0.00588747	0.0089592	0.0101879	-0.0113142	0.0112118	0.0140787	0.0144883	0.0267752	0.0507347	0.0591307	0.0587211	0.119337	0.0873906	0.100701	0.11606	0.110121	0.141043	0.124046	0.119746	0.109609	0.129985	0.124661	0.115446	0.112374	0.100087	0.0583116	0.0845236	0.0425434	0.0533968	0.0634311
	18	-0.031831	-0.0147419	-0.00208339	-0.0134761	0.0177484	0.00888737	0.00825444	0.012263	-0.00250534	0.00656663	0.0266094	0.00994225	0.00466784	0.0169045	0.0493948	0.0261874	0.0301959	0.0590997	0.0700704	0.0358923	0.0829399	0.0688046	0.0856826	0.0983412	0.127034	0.101717	0.0907461	0.129566	0.108046	0.131675	0.0991851	0.118173	0.114164	0.110156	0.0616314	0.0890583	0.0801973	0.0677497	0.102983	0.106991
	19	-0.00776327	-0.0182013	-0.0165312	0.0103989	0.0091463	-0.0129823	0.000169618	0.0245945	0.00998134	-0.00421434	0.0321099	0.0270997	-0.00588443	0.00580614	-0.0221677	-0.0409561	-0.00609319	-0.00504938	-0.00567566	-0.0234203	-0.017575	0.0049711	0.0039273	0.0584137	0.0688517	0.0734444	0.0308574	0.0584137	0.0918153	0.110186	0.112065	0.138995	0.13649	0.164046	0.185549	0.142753	0.129392	0.126678	0.187427	0.0984956
	20	-0.00425893	-0.0128011	-0.0147425	-0.00348238	-0.00289996	0.00991324	-0.00124977	-0.00367652	0.0254444	0.0172905	0.00564218	0.0184554	0.0190378	0.0378693	0.0466056	0.0739793	0.0479646	0.00991324	0.0258327	0.0254444	0.0434994	0.0642723	0.0386459	0.0483528	0.0588364	0.0289389	0.0308803	0.0116605	0.0207851	0.0213675	0.0390342	0.0770855	0.0592247	0.0732027	0.081939	0.0755324	0.0683492	0.0565067	0.0215616	0.0347631
	21	0.0100377	0.00133404	0.0038208	0.00133404	-0.0148299	-0.0198034	0.00278465	0.0111775	-0.00446839	-0.00218886	-0.00529731	0.00755093	0.00879431	-0.0198034	-0.0216685	-0.0349312	-0.0353456	-0.0620783	-0.054618	-0.0629072	-0.0428059	-0.0198034	-0.00571177	0.0303462	0.0900284	0.0753151	0.0854693	0.078009	0.0742789	0.109715	0.111166	0.135619	0.0939657	0.0813247	0.0726211	0.0672331	0.0506547	0.0498258	0.0842259	0.0262016
	22	-0.0285984	-0.00452122	-0.0060328	0.00238883	-0.019421	0.0118901	0.00109319	0.00130913	0.00541197	0.0440651	0.0183683	0.0182603	0.0205277	-0.00300965	0.00649167	-0.0140225	-0.0181254	-0.0563466	-0.0209326	-0.00624873	-0.0176935	-0.0369121	-0.0103516	0.0114583	0.0261421	0.0416897	0.0818544	0.135623	0.0771037	0.112734	0.123315	0.11986	0.0740806	0.105176	0.0809906	0.0606924	0.061988	0.0555098	0.0753762	0.068898
	23	-0.000306894	0.0298245	-0.0136986	0.00214826	-0.00164607	-0.00320844	0.0112993	0.00281784	-0.033563	0.00393382	0.00125548	0.0461178	0.0621879	0.0592863	0.063527	0.0191111	0.066875	0.0548224	0.0400915	0.0383059	0.0798203	0.147225	0.114192	0.167759	0.175794	0.214407	0.235611	0.199676	0.181151	0.176241	0.185615	0.16642	0.154591	0.104372	0.133387	0.115085	0.0813827	0.0766956	0.0708925	0.0758028
	24	-0.0165367	-0.0245218	0.00569209	0.0454018	0.00957673	0.000944185	0.0210149	-0.00596186	-0.0141628	-0.0176158	0.0225256	0.0149721	-0.00553023	0.0352586	0.00677116	-0.0297014	-0.00121395	-0.00639348	0.0108716	0.0449702	0.0302949	0.0864064	0.0723785	0.0976287	0.109714	0.107448	0.103672	0.0900753	0.0656883	0.092665	0.0630985	0.0842483	0.0635302	0.0756157	0.0887804	0.0436753	0.0132456	0.0406539	0.057919	0.0227414
	25	-0.00675369	-0.00397747	-0.0246923	0.0148154	-0.00675369	0.0152425	-0.00867569	0.0225034	0.020795	0.000934305	0.0109714	0.0244254	0.0310456	0.0430047	0.036171	0.0442861	0.0269881	0.103654	0.0955394	0.10579	0.125437	0.115614	0.163877	0.191853	0.13099	0.139959	0.155762	0.157257	0.174555	0.180534	0.175196	0.0882785	0.103014	0.0707669	0.101946	0.071194	0.0658552	0.0577401	0.0566723	0.0568858
	26	0.00664038	0.00767794	0.0151484	-0.00435775	-0.000207512	0.0197136	-0.00332019	-0.00560282	-0.0122432	-0.0180535	-0.00809296	-0.000415024	0.00186761	0.00809296	0.00373521	-0.00394273	0.0466902	0.0358996	0.0280141	0.0628761	0.0817597	0.0811372	0.100021	0.105624	0.096078	0.123262	0.0902677	0.108529	0.108944	0.123677	0.101266	0.101888	0.0940029	0.0628761	0.0595559	0.0736667	0.034032	0.0412949	0.043785	0.0504254
	ΔF/F for No-Go stimulus when d'= 0.69
	Time from cue onset (ms) Trial #	-900	-800	-700	-600	-500	-400	-300	-200	-100	0	100	200	300	400	500	600	700	800	900	1000	1100	1200	1300	1400	1500	1600	1700	1800	1900	2000	2100	2200	2300	2400	2500	2600	2700	2800	2900	3000
	1	-0.00305246	0.00339018	-0.00616987	-0.00346812	0.0106641	-0.0311091	0.00172756	-0.00658553	0.0270825	0.00546846	-0.0514762	0.0245886	-0.0140673	0.0218868	-0.013236	-0.0306935	-0.0302778	0.00463715	-0.00222115	-0.000350709	0.009625	-0.0086638	-0.024043	-0.0325639	-0.0277839	-0.0331874	0.0158598	0.0499435	0.0732202	0.0538922	0.0796628	0.0944185	0.135361	0.115617	0.090262	0.0690636	0.0549314	0.0590879	0.00754673	-0.00305246
	2	0.0103322	0.0211413	-0.00768293	-0.00132464	0.0113919	0.0173263	0.0173263	-0.0153129	-0.059397	-0.00492767	0.0414878	0.0198697	0.0525089	0.0289832	0.0113919	0.0003709	-0.0136173	-0.0229428	0.00566947	-0.0123457	-0.00694113	-0.00471573	-0.0240025	-0.0295131	-0.0373549	-0.0344937	-0.0144651	0.0200816	0.0728554	0.0673449	0.0717957	0.0974408	0.0995602	0.0995602	0.0904467	0.0766704	0.059291	0.0491178	0.044455	0.0327982
	3	-0.00104603	-0.0263598	0.0330544	0.00334728	-0.00962343	-0.0251046	-0.00439331	0.00962343	0.0083682	-0.00774059	-0.016318	-0.00355649	-0.016318	-0.0135983	-0.00313808	-0.00230126	-0.00251046	-0.0313808	-0.026569	-0.0539749	-0.0317992	-0.0146444	-0.00941423	0.0297071	0.0200837	0.0573222	0.025523	0.0631799	0.110042	0.0824268	0.0975941	0.0991632	0.0820084	0.083682	0.0629707	0.0610879	0.0320084	0.0269874	0.048954	0
	4	0.00471085	-0.00781773	-0.000239963	-0.00741358	-0.00357418	-0.00539284	0.00147766	0.0043067	-0.0227712	0.0150166	0.0612915	0.0251203	0.0301721	0.0253224	0.0416903	0.0338095	0.0194622	0.00673158	0.0200685	0.0192602	0.00855025	0.0212809	0.026939	0.0364364	0.0402758	0.0344157	0.0616957	0.0588666	0.0794781	0.0560376	0.0441152	0.0427007	0.0396696	0.0491671	0.0267369	0.026939	0.0372447	-0.019538	-0.0458076	0.0206747
	5	-0.016874	-0.0400545	-0.0164845	-0.0190168	0.00961796	0.015267	0.00708564	0.0111763	0.0113711	0.0216952	0.0215004	0.0312401	0.0916263	0.0731208	0.00689084	0.0164358	0.0429278	0.0499403	0.0250067	0.0195525	0.0335776	0.0160462	0.0859773	0.0583165	0.0514987	0.0694198	0.0865616	0.0789647	0.0853929	0.074874	0.0739	0.0779907	0.0879252	0.0725365	0.068251	0.0659135	0.0912367	0.0797438	0.0433173	0.0594853
	6	-0.00415817	-0.0181423	0.0178775	-0.00458193	-0.00776015	0.0153349	0.025929	0.000715099	-0.0198374	-0.0189899	-0.0172948	0.00601213	0.0314379	-0.0145404	-0.024075	-0.000344307	-0.0439918	-0.0677225	-0.0473819	0.025929	0.00940223	0.0225389	0.0274121	0.00664777	0.0424557	0.0404428	0.0293191	0.0517785	0.093731	0.0858914	0.0721191	0.0890696	0.0958498	0.0708478	0.0683052	0.0700003	0.0638557	0.0534735	0.0746616	0.0403369
	7	-0.0365559	-0.0113194	-0.00135196	0.0209156	-0.00453304	-0.00453304	0.00861543	0.0181587	0.0145535	0.00585849	0.0255812	0.0035257	0.00055669	0.00373777	0.00288948	0.00607057	-0.00983485	0.019219	0.0200673	0.0198553	0.0357607	0.0323675	0.0497574	0.0436073	0.0472126	0.0520902	0.0501816	0.0819924	0.0862339	0.0832649	0.0989582	0.101079	0.0849614	0.119317	0.120908	0.105745	0.098534	0.0796596	0.0817803	0.0828407
	8	0.00678255	0.00875964	-0.00112585	0.0461048	-0.0134278	0.0272126	-0.0197984	0.00238899	0.00788093	-0.0197984	-0.00090617	0.0494	0.0324848	0.0619216	0.101024	0.089601	0.0570887	0.0245764	0.0434687	0.02897	0.0757613	0.0746629	0.0637889	0.0551116	0.0355603	0.0768597	0.0772991	0.0819123	0.0676332	0.0911388	0.105857	0.130022	0.137491	0.0939946	0.0979488	0.0939946	0.0669742	0.112887	0.0680726	0.0920175
	9	-0.0066811	-0.00710614	-0.0122066	-0.00753118	-0.0136943	0.0060701	-0.00901882	0.0230717	0.0147834	0.015421	0.0609003	0.0115956	0.0502743	0.0162711	0.00415742	0.0162711	-0.00413086	-0.0134817	-0.0311209	-0.00370582	0.0200964	0.0268971	0.0281722	0.0496367	0.0596252	0.0798146	0.111055	0.114668	0.156109	0.146121	0.142933	0.125506	0.100854	0.0957536	0.0972412	0.0485741	0.0515494	0.041986	0.0226467	0.020734
	10	-0.00892914	0.00639986	0.0172323	-0.00218438	0.00333406	-0.0050458	-0.00473922	-0.00484141	-0.00177561	-0.000753676	0.00231212	0.019685	0.0149841	0.00926127	-0.0105642	-0.0312073	-0.00484141	-0.00913353	0.016517	0.0125315	0.0149841	0.0113051	0.0143709	0.0303131	0.0452333	0.0523869	0.0435982	0.0581097	0.083658	0.103892	0.111046	0.112681	0.134346	0.125353	0.114929	0.138842	0.147631	0.179924	0.161734	0.134142
	11	-0.0108004	0.0377067	0.0175676	0.0182173	0.016918	-0.0250927	-0.00148878	-0.00906802	-0.01773	-0.019679	-0.0120997	-0.00343773	0.00305877	0.0110711	-0.0105839	-0.0211948	-0.0339713	-0.0506456	-0.0363533	-0.0250927	-0.0298568	-0.0237934	-0.0341878	-0.0170804	0.0203828	0.023631	0.0290447	0.0316433	0.0961752	0.0851311	0.0888125	0.0615272	0.0587121	0.0662913	0.0675906	0.0597948	0.0801505	0.0537314	0.0940097	0.0234145
	12	-0.0455054	-0.0758336	-0.0423462	-0.00380418	0.0440048	0.0800195	0.00293541	0.00514684	0.0332636	0.0189419	-0.0092801	0.012413	0.00756888	-0.00296173	-0.00211929	0.00125051	0.0178889	-0.00127684	-0.0154932	-0.0101225	0.00735826	0.00546275	0.00125051	-0.00780582	0.0484276	0.0385289	0.0416881	0.0684358	0.115402	0.117508	0.165317	0.201332	0.166581	0.143203	0.175216	0.114139	0.118562	0.0878121	0.0737011	0.037897
	13	-0.00594387	-0.0233687	-0.00489418	-0.0116122	-0.0105625	-0.0229488	-0.00499915	0.00917166	0.018199	0.0370934	0.0358338	0.0354139	-0.0162308	0.0016139	0.0209282	0.0144201	0.0635456	0.0564077	0.00266359	0.00182384	0.0272263	0.0261766	0.0469605	0.0482201	0.0421319	0.0400325	0.0597667	0.0618661	0.107633	0.0818102	0.125267	0.103434	0.0946164	0.0931468	0.0755121	0.08244	0.0524189	0.0459108	0.034994	0.00182384
	14	-0.00546246	0.0133263	-0.00081805	-0.00271804	-0.0191846	-0.0162291	0.00340414	-0.010318	0.00614857	0.0321151	0.0458372	0.024304	0.0215596	0.0209262	0.0248318	0.0293706	0.0426705	0.0428816	0.0582926	0.0504816	0.0701148	0.0688481	0.0941813	0.0825703	0.0804592	0.0601926	0.0893258	0.111281	0.0661037	0.116137	0.126903	0.157936	0.151814	0.126481	0.137037	0.112126	0.123737	0.148014	0.123103	0.122787
	15	0.0105151	0.0235553	-0.00658695	-0.00295277	-0.0186652	-0.0115038	0.00281916	0.0282584	-0.0209099	-0.0104349	0.0513461	0.0442915	0.0308237	0.0244104	0.0111564	0.0355268	0.0165008	-0.00936602	-0.01129	-0.01129	-0.0200548	0.00431559	0.00014697	0.00260538	0.024838	0.022914	0.0410849	0.043864	0.0581869	0.0671655	0.0902532	0.0671655	0.093246	0.139421	0.123175	0.166357	0.155455	0.210822	0.174053	0.179611
	16	-0.00940615	0.0242875	-0.015471	-0.0134494	-0.0098554	-0.00289204	2.8078e-05	0.00249895	0.0242875	0.0160887	0.0211428	0.0266461	0.0350695	0.039562	0.0108101	0.030577	0.0220413	0.026983	0.0166503	0.0170995	0.04675	0.00856381	0.0191212	0.0281061	-0.00491366	0.019795	0.0557349	0.0633722	0.105152	0.121775	0.138172	0.168496	0.145809	0.124021	0.102794	0.102457	0.096392	0.0983013	0.116384	0.0811175
	17	-0.0138815	-0.0140838	-0.0159043	0.00290779	-0.000328706	0.00209866	0.00776252	0.0152469	-0.0128701	0.0180788	0.0312271	0.0138309	0.00412147	0.0152469	-0.00194695	-0.0144884	-0.00841993	0.00776252	-0.0104427	-0.010645	0.00371691	0.00209866	0.00209866	-0.0258161	-0.0294571	-0.00538572	0.0421502	0.0356773	0.0652102	0.0362841	0.0704695	0.0749197	0.0868543	0.106476	0.102834	0.114162	0.081595	0.106678	0.114971	0.176262
	18	-0.0438692	-0.0540302	-0.001432	-0.000435828	-0.0129877	-0.00183048	-0.0133861	0.0190892	0.0655111	0.0479784	0.0288518	0.0521623	0.0563463	0.0641165	0.0346296	0.0109206	0.00992442	0.0495723	-0.0351028	0.00295117	-0.0193632	0.0292503	-0.0215548	-0.036099	-0.0253403	-0.0335089	0.0567447	0.00773283	0.0631203	0.0655111	0.0792583	0.0384151	0.0234724	0.0376181	-0.0175701	-0.028528	-0.0127884	-0.0396852	-0.042873	-0.021754
	19	-0.0211961	0.0329296	0.0353899	0.00340651	0.0196821	0.0185466	-0.0196821	-0.0213853	-0.00719152	-0.016654	0.00227101	-0.00302801	0.0499621	0.0509084	0.0468395	0.0404996	0.0384179	0.0582892	0.0404996	0.0450416	0.0626419	0.0439061	0.0505299	0.0452309	0.0991673	0.102385	0.140045	0.144587	0.104088	0.106359	0.122067	0.106737	0.0950038	0.0946253	0.0509084	0.0465556	0.0221423	0.0340651	-0.00946253	-0.0130583
	20	0.000451864	-0.0167434	-0.0171342	0.00514148	0.00338288	-0.00306535	0.00250357	0.0123713	0.0094403	0.00103807	-0.0288582	-0.00208835	0.0207735	0.0637617	0.0733363	0.0305436	0.028785	0.0285896	-0.026318	-0.015571	-0.0228008	-0.0347203	-0.0581684	-0.0470305	-0.0499615	-0.0102952	0.00201507	0.00553228	0.0328884	0.0471526	0.0373826	0.0997154	0.0915086	0.0973706	0.0801754	0.0747041	0.0281988	-0.00130674	-0.0100998	-0.00814577
	21	0.029379	0.023788	-0.00810188	-0.0101727	-0.00955142	-0.00934434	-0.00872311	-0.0132788	-0.0147283	0.0155049	0.0196464	0.0460487	0.0246163	0.0230632	0.013227	-0.0176274	0.0177827	0.0150907	0.00452981	0.00887842	-0.000232961	0.00722181	0.0063935	-0.0221831	-0.0155566	0.00618642	0.0424249	0.080527	0.100406	0.114073	0.150933	0.162115	0.163151	0.163358	0.133125	0.145963	0.136024	0.140579	0.15259	0.166464
	22	0.0260757	-0.00737351	-0.00872955	0.0229115	-0.00759951	-0.00285335	0.00257084	-0.0121197	-0.0105376	-0.00127129	0.0224595	0.0477724	0.0536486	0.0565867	0.0529706	-0.0308783	-0.00556544	-0.0286182	0.0150013	-0.00918157	-0.0186739	-0.0177699	0.00166681	0.007091	-0.00872955	0.0391841	0.0174874	0.035568	0.0559087	0.0841597	0.0771534	0.0798655	0.111959	0.116479	0.128005	0.116931	0.0909399	0.117835	0.0870978	0.0874368
	23	0.0269819	-0.00973574	0.0336579	0.0156328	-0.00528512	-0.0190821	-0.0228651	-0.0072879	-0.0208623	-0.00817803	-0.000834492	0.00472879	0.0147427	0.0474548	0.0305424	0.0427816	0.0140751	-0.00394993	5.56326e-05	-0.00394993	-0.0331015	-0.0132962	-0.0304312	-0.0348818	-0.0368846	-0.00283727	0.059694	0.0850626	0.0694854	0.103755	0.0545758	0.0690403	0.0650348	0.037886	0.0690403	0.0783866	0.0754937	0.0556885	0.045007	0.0249791
	24	-0.00798321	0.0209435	-0.0171717	-0.0112729	-0.0282886	0.012776	0.000751528	0.00596968	0.0159522	0.0275229	0.0558825	0.0540675	0.110333	0.0738057	0.0595125	0.0427237	0.0370517	0.021851	0.0175404	0.0195823	0.0252542	0.020036	0.0359174	0.0930902	0.145272	0.121677	0.12576	0.139827	0.172951	0.180438	0.191555	0.206075	0.205848	0.187925	0.176581	0.152078	0.154574	0.109425	0.0926364	0.0912752
	ΔF/F for Go stimulus when d'= 1.5
	Time from cue onset (ms) Trial #	-900	-800	-700	-600	-500	-400	-300	-200	-100	0	100	200	300	400	500	600	700	800	900	1000	1100	1200	1300	1400	1500	1600	1700	1800	1900	2000	2100	2200	2300	2400	2500	2600	2700	2800	2900	3000
	1	-0.00376798	-0.00780131	0.036353	0.00281272	0.0119408	-0.0485591	-0.0152311	-0.0133206	-0.00482938	0.0132145	0.0287109	0.00111447	0.00684604	0.00705832	0.00557236	-0.0035557	0.021918	0.0478162	0.0217057	0.0588547	0.0425092	0.0775354	0.0989757	0.0906968	0.148437	0.117444	0.161598	0.163297	0.199809	0.147163	0.158202	0.151409	0.148013	0.131455	0.100886	0.118293	0.0745635	0.076474	0.0439951	0.0482407
	2	-0.0329612	0.00814429	0.0138652	0.0191623	0.00284719	0.00814429	0.0167256	0.00708487	-0.0121966	-0.0191887	0.0183147	-0.0153748	-0.0189769	-0.0170699	-0.0181293	-0.0232145	-0.0092302	0.041622	0.0161959	0.0352654	0.0539112	0.0666243	0.0496736	0.0469191	0.0382318	0.0384437	0.0564539	0.0859057	0.0750997	0.0986188	0.112179	0.13252	0.126587	0.0882365	0.0936395	0.0861176	0.0755234	0.083575	0.0606915	0.047131
	3	0.0291547	0.0300576	0.0035738	0.0280512	0.0400893	-0.0112732	-0.00685919	-0.0291296	-0.0353493	-0.0425721	-0.028929	-0.045381	-0.0409671	-0.0606292	-0.0447791	-0.047588	-0.0594254	-0.0734698	-0.0664476	-0.0598267	-0.0443778	-0.0333429	-0.0269226	0.0338696	0.0593502	-0.00685919	0.0549362	0.0290544	0.00718522	0.0515254	0.0942606	0.033669	0.0635635	0.0412931	0.0244398	0.0184208	0.0200258	0.0298569	0.0111979	-0.000639523
	4	0.0105975	0.0144883	0.000972713	0.00138228	0.000972713	-0.00926637	-0.0150003	-0.00988071	0.0230891	-0.00250858	0.00588747	0.0089592	0.0101879	-0.0113142	0.0112118	0.0140787	0.0144883	0.0267752	0.0507347	0.0591307	0.0587211	0.119337	0.0873906	0.100701	0.11606	0.110121	0.141043	0.124046	0.119746	0.109609	0.129985	0.124661	0.115446	0.112374	0.100087	0.0583116	0.0845236	0.0425434	0.0533968	0.0634311
	5	-0.031831	-0.0147419	-0.00208339	-0.0134761	0.0177484	0.00888737	0.00825444	0.012263	-0.00250534	0.00656663	0.0266094	0.00994225	0.00466784	0.0169045	0.0493948	0.0261874	0.0301959	0.0590997	0.0700704	0.0358923	0.0829399	0.0688046	0.0856826	0.0983412	0.127034	0.101717	0.0907461	0.129566	0.108046	0.131675	0.0991851	0.118173	0.114164	0.110156	0.0616314	0.0890583	0.0801973	0.0677497	0.102983	0.106991
	6	-0.00776327	-0.0182013	-0.0165312	0.0103989	0.0091463	-0.0129823	0.000169618	0.0245945	0.00998134	-0.00421434	0.0321099	0.0270997	-0.00588443	0.00580614	-0.0221677	-0.0409561	-0.00609319	-0.00504938	-0.00567566	-0.0234203	-0.017575	0.0049711	0.0039273	0.0584137	0.0688517	0.0734444	0.0308574	0.0584137	0.0918153	0.110186	0.112065	0.138995	0.13649	0.164046	0.185549	0.142753	0.129392	0.126678	0.187427	0.0984956
	7	-0.00425893	-0.0128011	-0.0147425	-0.00348238	-0.00289996	0.00991324	-0.00124977	-0.00367652	0.0254444	0.0172905	0.00564218	0.0184554	0.0190378	0.0378693	0.0466056	0.0739793	0.0479646	0.00991324	0.0258327	0.0254444	0.0434994	0.0642723	0.0386459	0.0483528	0.0588364	0.0289389	0.0308803	0.0116605	0.0207851	0.0213675	0.0390342	0.0770855	0.0592247	0.0732027	0.081939	0.0755324	0.0683492	0.0565067	0.0215616	0.0347631
	8	0.0100377	0.00133404	0.0038208	0.00133404	-0.0148299	-0.0198034	0.00278465	0.0111775	-0.00446839	-0.00218886	-0.00529731	0.00755093	0.00879431	-0.0198034	-0.0216685	-0.0349312	-0.0353456	-0.0620783	-0.054618	-0.0629072	-0.0428059	-0.0198034	-0.00571177	0.0303462	0.0900284	0.0753151	0.0854693	0.078009	0.0742789	0.109715	0.111166	0.135619	0.0939657	0.0813247	0.0726211	0.0672331	0.0506547	0.0498258	0.0842259	0.0262016
	9	-0.0285984	-0.00452122	-0.0060328	0.00238883	-0.019421	0.0118901	0.00109319	0.00130913	0.00541197	0.0440651	0.0183683	0.0182603	0.0205277	-0.00300965	0.00649167	-0.0140225	-0.0181254	-0.0563466	-0.0209326	-0.00624873	-0.0176935	-0.0369121	-0.0103516	0.0114583	0.0261421	0.0416897	0.0818544	0.135623	0.0771037	0.112734	0.123315	0.11986	0.0740806	0.105176	0.0809906	0.0606924	0.061988	0.0555098	0.0753762	0.068898
	10	-0.000306894	0.0298245	-0.0136986	0.00214826	-0.00164607	-0.00320844	0.0112993	0.00281784	-0.033563	0.00393382	0.00125548	0.0461178	0.0621879	0.0592863	0.063527	0.0191111	0.066875	0.0548224	0.0400915	0.0383059	0.0798203	0.147225	0.114192	0.167759	0.175794	0.214407	0.235611	0.199676	0.181151	0.176241	0.185615	0.16642	0.154591	0.104372	0.133387	0.115085	0.0813827	0.0766956	0.0708925	0.0758028
	11	-0.0165367	-0.0245218	0.00569209	0.0454018	0.00957673	0.000944185	0.0210149	-0.00596186	-0.0141628	-0.0176158	0.0225256	0.0149721	-0.00553023	0.0352586	0.00677116	-0.0297014	-0.00121395	-0.00639348	0.0108716	0.0449702	0.0302949	0.0864064	0.0723785	0.0976287	0.109714	0.107448	0.103672	0.0900753	0.0656883	0.092665	0.0630985	0.0842483	0.0635302	0.0756157	0.0887804	0.0436753	0.0132456	0.0406539	0.057919	0.0227414
	12	-0.00675369	-0.00397747	-0.0246923	0.0148154	-0.00675369	0.0152425	-0.00867569	0.0225034	0.020795	0.000934305	0.0109714	0.0244254	0.0310456	0.0430047	0.036171	0.0442861	0.0269881	0.103654	0.0955394	0.10579	0.125437	0.115614	0.163877	0.191853	0.13099	0.139959	0.155762	0.157257	0.174555	0.180534	0.175196	0.0882785	0.103014	0.0707669	0.101946	0.071194	0.0658552	0.0577401	0.0566723	0.0568858
	13	0.00664038	0.00767794	0.0151484	-0.00435775	-0.000207512	0.0197136	-0.00332019	-0.00560282	-0.0122432	-0.0180535	-0.00809296	-0.000415024	0.00186761	0.00809296	0.00373521	-0.00394273	0.0466902	0.0358996	0.0280141	0.0628761	0.0817597	0.0811372	0.100021	0.105624	0.096078	0.123262	0.0902677	0.108529	0.108944	0.123677	0.101266	0.101888	0.0940029	0.0628761	0.0595559	0.0736667	0.034032	0.0412949	0.043785	0.0504254
	14	0.00723246	0.0198151	0.0311602	0.0136269	0.00929519	0.0177524	-0.0212333	-0.0230897	-0.030103	-0.0139106	-0.0136011	-0.0183454	-0.0127761	-0.00204984	-0.0113321	0.0255908	0.0218779	0.0536439	0.0746838	0.104387	0.128521	0.116351	0.124189	0.128521	0.122952	0.109131	0.1081	0.12584	0.166682	0.156368	0.128934	0.101087	0.114082	0.0705584	0.0872665	0.0693207	0.0623074	0.0790156	0.0202277	0.0362139
	15	-0.0180412	-0.0343643	-0.00987972	-0.00257732	-0.00300687	-0.00730241	-0.0036512	0.00773196	0.0283505	0.0347938	0.0214777	0.0171821	-0.00687285	0.00257732	-0.00515464	-0.000429553	0.0135309	0.0786082	0.0607818	0.0708763	0.0829038	0.138746	0.114905	0.138746	0.130584	0.140249	0.111254	0.120704	0.165808	0.170747	0.130799	0.1439	0.149699	0.151632	0.118557	0.0691581	0.104167	0.114691	0.130584	0.107174
	16	-0.00447231	0.0225507	0.00179703	0.0160652	-0.0180919	-0.0178757	-0.0116064	0.0035265	-0.011174	0.024064	0.0471957	0.0337923	0.0247125	0.0482766	0.0677332	0.0277391	0.0772453	0.0869736	0.0703274	0.10643	0.0997284	0.146208	0.130427	0.14383	0.13194	0.139506	0.171285	0.138858	0.144479	0.144911	0.135615	0.120698	0.13475	0.147073	0.125022	0.119834	0.109889	0.0884868	0.0848117	0.0716245
	17	0.00884192	-0.0209187	-0.02135	0.0135864	-0.013802	-0.0390339	0.0183308	0.0168212	0.0338581	-0.00258788	-0.0265258	-0.0157429	-0.00927324	-0.0131551	-0.0105672	-0.00237222	0.036446	0.0614622	0.070951	0.0463662	0.113867	0.115376	0.148372	0.141255	0.17231	0.153116	0.120121	0.164546	0.087341	0.135648	0.11667	0.112788	0.110416	0.0644813	0.110848	0.129178	0.125943	0.0940263	0.0838904	0.0849687
	18	-0.027171	-0.0337773	-0.00213106	-0.0324987	0.0216303	0.0214172	0.015024	0.000958977	0.0160895	0.00607352	0.0646777	0.0356953	0.0663825	0.0851359	0.0697922	0.0621204	0.0644646	0.035269	0.106233	0.103037	0.151199	0.130741	0.147576	0.155248	0.146084	0.151199	0.148215	0.126052	0.124774	0.115184	0.106233	0.0795951	0.113053	0.129036	0.0873735	0.123495	0.117102	0.117208	0.127757	0.108151
	19	0.0268663	0.0234387	-0.0150713	-0.0172892	-0.00599829	-0.000756086	-0.00478855	-0.0187005	0.0431977	-0.00660316	0.00246988	-0.00458692	-0.0144665	0.0401734	0.0365442	0.0339231	0.0559	0.0516659	0.0800948	0.0472302	0.0774737	0.0806996	0.0708201	0.0974343	0.101668	0.133323	0.100862	0.116185	0.12304	0.12304	0.103685	0.0932003	0.0796915	0.0790866	0.082111	0.0290841	0.0613438	0.0357377	0.0385604	0.0395685
	20	-0.0169761	-0.0159519	-0.0124696	0.0106773	0.00944821	0.00862886	0.00555627	0.0121111	0.0213289	-0.0100115	0.0373064	-0.0057099	-0.00284215	0.00238126	-0.00734861	-0.0532326	-0.0587633	-0.0532326	-0.015747	-0.0188196	0.00699014	-0.0110357	0.0596338	0.0864678	0.119242	0.166765	0.153655	0.146076	0.133171	0.102036	0.116784	0.113507	0.103469	0.104494	0.0856484	0.0319805	0.0612726	0.0577903	0.0315709	0.0205095
	21	0.0343432	0.0321644	-0.00850799	0.00726292	0.00560282	0.00850799	-0.0153559	-0.0153559	-0.0145258	-0.017431	-0.0122432	0.00124507	0.00933804	0.0197136	0.0207512	0.0396348	0.0796846	0.096078	0.133845	0.179498	0.141938	0.13177	0.117867	0.103548	0.106869	0.139863	0.109774	0.139656	0.137165	0.129902	0.106454	0.0852874	0.0710728	0.0906827	0.0825897	0.0674414	0.0574808	0.0489728	0.0412949	0.0554057
	22	-0.0112628	0.0269493	-0.00996011	-0.0203816	0.00892881	-0.0147366	0.00740902	0.00914593	0.0126198	-0.00648628	0.0708063	0.0215214	0.0356338	0.0252124	0.0382392	0.0134882	0.0182647	0.0482264	0.0404103	0.0395419	0.0278177	0.0990311	0.0829647	0.0975113	0.106413	0.0857872	0.0842674	0.116834	0.104676	0.0794909	0.091215	0.104676	0.079708	0.087307	0.106196	0.0901295	0.0862214	0.0838332	0.0517003	0.0627731
	23	0.000873363	-0.0323144	-0.00126152	0.0138768	-0.0109656	0.00494905	0.00999515	0.00281417	-0.0117419	0.0111596	0.00533722	0.00941291	-0.00630762	0.02164	0.0468705	0.0507521	0.0226104	0.0301795	0.0614265	0.0600679	0.0295973	0.0344493	0.00824842	0.000679282	0.0328967	0.0319262	0.031344	0.0235808	0.0185347	0.0243571	0.0311499	0.0247453	-0.0311499	-0.050558	0.00300825	0.0165939	-0.0427948	-0.0165939	-0.072295	-0.062591
	24	0.011139	-0.0203995	0.0191824	0.0100807	-0.00600609	0.0138907	-0.00198439	-0.0271729	-0.00346607	0.00478899	0.0253208	-0.00261939	0.0384442	0.0157957	0.00690568	0.0232041	0.0268025	0.010504	0.0911496	0.101098	0.0714645	0.0761212	0.0725228	0.0932663	0.0981347	0.145337	0.143008	0.130943	0.117185	0.113163	0.112316	0.0994047	0.057071	0.0723112	0.0534727	0.0617277	0.0388676	0.0370684	0.0367509	0.00648234
	25	-0.0135876	-0.00723208	0.00460224	-0.000657462	-0.00569801	0.0133684	0.0103002	0.00920447	-0.0107385	-0.00219154	-0.0361604	-0.0135876	-0.00153408	-0.0110673	-0.00986193	0.014245	-0.0110673	0.0151216	0.0135876	0.0479947	0.0552268	0.10366	0.114618	0.159763	0.118124	0.159763	0.193513	0.177296	0.233837	0.18387	0.162393	0.190007	0.161517	0.142231	0.124151	0.122507	0.118562	0.0359413	0.0344072	0.0344072
	ΔF/F for No-Go stimulus when d'= 1.5
	Time from cue onset (ms) Trial #	-900	-800	-700	-600	-500	-400	-300	-200	-100	0	100	200	300	400	500	600	700	800	900	1000	1100	1200	1300	1400	1500	1600	1700	1800	1900	2000	2100	2200	2300	2400	2500	2600	2700	2800	2900	3000
	1	-0.00594387	-0.0233687	-0.00489418	-0.0116122	-0.0105625	-0.0229488	-0.00499915	0.00917166	0.018199	0.0370934	0.0358338	0.0354139	-0.0162308	0.0016139	0.0209282	0.0144201	0.0635456	0.0564077	0.00266359	0.00182384	0.0272263	0.0261766	0.0469605	0.0482201	0.0421319	0.0400325	0.0597667	0.0618661	0.107633	0.0818102	0.125267	0.103434	0.0946164	0.0931468	0.0755121	0.08244	0.0524189	0.0459108	0.034994	0.00182384
	2	-0.00546246	0.0133263	-0.00081805	-0.00271804	-0.0191846	-0.0162291	0.00340414	-0.010318	0.00614857	0.0321151	0.0458372	0.024304	0.0215596	0.0209262	0.0248318	0.0293706	0.0426705	0.0428816	0.0582926	0.0504816	0.0701148	0.0688481	0.0941813	0.0825703	0.0804592	0.0601926	0.0893258	0.111281	0.0661037	0.116137	0.126903	0.157936	0.151814	0.126481	0.137037	0.112126	0.123737	0.148014	0.123103	0.122787
	3	0.0105151	0.0235553	-0.00658695	-0.00295277	-0.0186652	-0.0115038	0.00281916	0.0282584	-0.0209099	-0.0104349	0.0513461	0.0442915	0.0308237	0.0244104	0.0111564	0.0355268	0.0165008	-0.00936602	-0.01129	-0.01129	-0.0200548	0.00431559	0.00014697	0.00260538	0.024838	0.022914	0.0410849	0.043864	0.0581869	0.0671655	0.0902532	0.0671655	0.093246	0.139421	0.123175	0.166357	0.155455	0.210822	0.174053	0.179611
	4	-0.00940615	0.0242875	-0.015471	-0.0134494	-0.0098554	-0.00289204	2.8078e-05	0.00249895	0.0242875	0.0160887	0.0211428	0.0266461	0.0350695	0.039562	0.0108101	0.030577	0.0220413	0.026983	0.0166503	0.0170995	0.04675	0.00856381	0.0191212	0.0281061	-0.00491366	0.019795	0.0557349	0.0633722	0.105152	0.121775	0.138172	0.168496	0.145809	0.124021	0.102794	0.102457	0.096392	0.0983013	0.116384	0.0811175
	5	-0.0138815	-0.0140838	-0.0159043	0.00290779	-0.000328706	0.00209866	0.00776252	0.0152469	-0.0128701	0.0180788	0.0312271	0.0138309	0.00412147	0.0152469	-0.00194695	-0.0144884	-0.00841993	0.00776252	-0.0104427	-0.010645	0.00371691	0.00209866	0.00209866	-0.0258161	-0.0294571	-0.00538572	0.0421502	0.0356773	0.0652102	0.0362841	0.0704695	0.0749197	0.0868543	0.106476	0.102834	0.114162	0.081595	0.106678	0.114971	0.176262
	6	-0.0438692	-0.0540302	-0.001432	-0.000435828	-0.0129877	-0.00183048	-0.0133861	0.0190892	0.0655111	0.0479784	0.0288518	0.0521623	0.0563463	0.0641165	0.0346296	0.0109206	0.00992442	0.0495723	-0.0351028	0.00295117	-0.0193632	0.0292503	-0.0215548	-0.036099	-0.0253403	-0.0335089	0.0567447	0.00773283	0.0631203	0.0655111	0.0792583	0.0384151	0.0234724	0.0376181	-0.0175701	-0.028528	-0.0127884	-0.0396852	-0.042873	-0.021754
	7	-0.0211961	0.0329296	0.0353899	0.00340651	0.0196821	0.0185466	-0.0196821	-0.0213853	-0.00719152	-0.016654	0.00227101	-0.00302801	0.0499621	0.0509084	0.0468395	0.0404996	0.0384179	0.0582892	0.0404996	0.0450416	0.0626419	0.0439061	0.0505299	0.0452309	0.0991673	0.102385	0.140045	0.144587	0.104088	0.106359	0.122067	0.106737	0.0950038	0.0946253	0.0509084	0.0465556	0.0221423	0.0340651	-0.00946253	-0.0130583
	8	0.000451864	-0.0167434	-0.0171342	0.00514148	0.00338288	-0.00306535	0.00250357	0.0123713	0.0094403	0.00103807	-0.0288582	-0.00208835	0.0207735	0.0637617	0.0733363	0.0305436	0.028785	0.0285896	-0.026318	-0.015571	-0.0228008	-0.0347203	-0.0581684	-0.0470305	-0.0499615	-0.0102952	0.00201507	0.00553228	0.0328884	0.0471526	0.0373826	0.0997154	0.0915086	0.0973706	0.0801754	0.0747041	0.0281988	-0.00130674	-0.0100998	-0.00814577
	9	0.029379	0.023788	-0.00810188	-0.0101727	-0.00955142	-0.00934434	-0.00872311	-0.0132788	-0.0147283	0.0155049	0.0196464	0.0460487	0.0246163	0.0230632	0.013227	-0.0176274	0.0177827	0.0150907	0.00452981	0.00887842	-0.000232961	0.00722181	0.0063935	-0.0221831	-0.0155566	0.00618642	0.0424249	0.080527	0.100406	0.114073	0.150933	0.162115	0.163151	0.163358	0.133125	0.145963	0.136024	0.140579	0.15259	0.166464
	10	0.0260757	-0.00737351	-0.00872955	0.0229115	-0.00759951	-0.00285335	0.00257084	-0.0121197	-0.0105376	-0.00127129	0.0224595	0.0477724	0.0536486	0.0565867	0.0529706	-0.0308783	-0.00556544	-0.0286182	0.0150013	-0.00918157	-0.0186739	-0.0177699	0.00166681	0.007091	-0.00872955	0.0391841	0.0174874	0.035568	0.0559087	0.0841597	0.0771534	0.0798655	0.111959	0.116479	0.128005	0.116931	0.0909399	0.117835	0.0870978	0.0874368
	11	0.0269819	-0.00973574	0.0336579	0.0156328	-0.00528512	-0.0190821	-0.0228651	-0.0072879	-0.0208623	-0.00817803	-0.000834492	0.00472879	0.0147427	0.0474548	0.0305424	0.0427816	0.0140751	-0.00394993	5.56326e-05	-0.00394993	-0.0331015	-0.0132962	-0.0304312	-0.0348818	-0.0368846	-0.00283727	0.059694	0.0850626	0.0694854	0.103755	0.0545758	0.0690403	0.0650348	0.037886	0.0690403	0.0783866	0.0754937	0.0556885	0.045007	0.0249791
	12	-0.00798321	0.0209435	-0.0171717	-0.0112729	-0.0282886	0.012776	0.000751528	0.00596968	0.0159522	0.0275229	0.0558825	0.0540675	0.110333	0.0738057	0.0595125	0.0427237	0.0370517	0.021851	0.0175404	0.0195823	0.0252542	0.020036	0.0359174	0.0930902	0.145272	0.121677	0.12576	0.139827	0.172951	0.180438	0.191555	0.206075	0.205848	0.187925	0.176581	0.152078	0.154574	0.109425	0.0926364	0.0912752
	13	-0.0204613	-0.0178562	0.00645862	-0.0243691	-0.0434735	0.0160109	0.0177476	0.0227408	0.00993216	0.0251289	0.00949796	0.0379376	-0.0252374	0.00298508	0.0121031	0.0142741	-0.0126459	-0.0130801	-0.0046133	-0.0269742	-0.00374491	-0.0161194	-0.0132972	-0.0245862	-0.00483039	-0.0145997	0.0147083	0.0331615	0.0642062	0.072673	0.0956852	0.0824423	0.0826594	0.092863	0.108277	0.12152	0.0813569	0.0377205	0.0342469	0.0531343
	14	0.013273	0.0198762	-0.00632364	-0.0218731	0.00794781	0.00411369	-0.00909272	0.00230314	-0.000572456	-0.00887972	-0.0125008	-0.0125008	-0.000572456	0.00304866	-0.00419357	-0.00312854	-0.00163749	-0.0269853	-0.0318844	0.00496572	-0.00611063	-0.0103708	-0.00142448	0.0262664	0.0394728	0.0354257	0.0650336	0.0895294	0.0837782	0.135539	0.140864	0.169833	0.140651	0.115303	0.123397	0.127658	0.0869733	0.128936	0.102949	0.11296
	15	-0.00709333	0.00845078	-0.00283467	-0.000918274	-0.00389934	-0.00730626	-0.0173141	0.011006	0.0112189	0.0144129	0.0399649	0.0361321	0.0799963	0.0557219	0.05849	0.07446	0.0748859	0.0544443	0.0670074	0.052315	0.101077	0.0782928	0.0663686	0.0199492	0.0484822	0.0758441	0.0736083	0.0951145	0.101715	0.106826	0.118324	0.102993	0.133868	0.0931981	0.0799963	0.111084	0.0914947	0.0621099	0.120454	0.104058
	16	-0.00349345	0.0227074	-0.000655022	-0.010917	-0.0220524	0.00174672	0.0010917	0.00480349	0.0165939	0.00524017	0.0200873	0.0246725	0.0475983	0.0639738	0.0572052	0.0624454	0.0489083	0.0432314	0.0825327	0.0323144	0.0228166	0.0257642	0.0296943	0.0255459	0.0213974	-0.0194323	0.00873362	0.0519651	0.0524017	0.0748908	0.109825	0.116594	0.152183	0.107424	0.123799	0.112227	0.0995633	0.117249	0.115284	0.0864629
	17	-0.0163298	-0.00706009	0.0110482	-0.00361089	0.00759903	0.0270008	0.0216114	0.00565885	-0.0329291	-0.0212881	-0.00619779	-0.00393425	-0.00404204	-0.00339531	0.00393425	0.0295877	0.0142819	-0.0225815	0.0155753	-0.00706009	-0.00188628	-0.00835354	-0.00253301	-0.0344382	-0.0462948	-0.0135274	-0.00361089	0.0198868	0.0192401	0.00824576	0.0108327	-0.00835354	-0.0236594	-0.0139585	-0.0212881	-0.00576664	-0.0156831	-0.0115872	-0.0225815	-0.0262463
	18	0.0205016	-0.00212829	-0.0215254	-0.00816294	-0.00299038	0.0233034	-0.0109647	0.00929443	0.00132008	-0.00148172	0.0108031	0.042916	0.0293381	0.0390366	0.0485196	0.0582182	0.0463644	0.0302002	0.0228724	0.00563054	0.00207441	-0.0137665	0.00800129	-0.000404106	0.0198551	0.0314933	0.0590803	0.0595113	0.0724427	0.0580026	0.033433	0.0616665	0.0633907	0.0198551	0.0403298	0.0215792	0.0118807	0.000457986	-0.00773189	0.0282605
	19	-0.00501174	0.00619259	0.00795013	0.00179873	-0.00391328	-0.0107238	-0.0159964	-0.00874652	0.0167378	0.0187151	0.00179873	0.0198135	0.0277225	0.0279422	0.0360708	0.0114652	0.0149803	0.0277225	0.0191545	0.0228892	0.00135935	0.00970767	-0.00171635	0.0143212	0.0281619	0.0479342	0.0526209	0.0603103	0.0619945	0.0382677	0.0202529	0.00443505	0.0389268	0.00970767	0.0472751	0.054525	0.0202529	0.0222302	0.023768	0.0202529
	20	0.0047485	-0.020501	-0.00184822	0.0163496	0.00975291	-0.00321306	0.000426512	-0.0318747	-0.00639768	0.025676	0.0113452	0.026131	0.0673036	0.0370497	0.0557025	0.101879	-0.00548779	0.0436464	0.0334101	0.0231738	0.0340925	0.0227189	0.0231738	0.0234013	0.021354	0.0206716	0.0609343	0.0754926	0.0709432	0.133043	0.130314	0.159203	0.129631	0.163297	0.154881	0.191049	0.151469	0.17831	0.146919	0.146464
	21	-0.0581769	-0.0700486	-0.0276182	-0.0300366	-0.00453434	0.0310808	0.0181099	0.0229465	0.0702135	0.0486686	0.0363571	0.0433922	0.0297617	0.0469098	0.0743906	0.106708	0.13309	0.126934	0.125395	0.164748	0.112424	0.124296	0.127594	0.125615	0.0398747	0.0985737	0.111545	0.101212	0.0987936	0.100333	0.137706	0.102751	0.100113	0.103191	0.0662563	0.116381	0.036577	0.063838	0.0403144	0.0506472
	22	-0.0281144	-0.0326691	-0.0272468	-0.017053	-0.0216077	-0.00794361	0.0297953	0.0475803	0.00897384	0.0239393	0.0449776	0.0317473	0.0488817	0.0532195	0.0556053	0.0974651	0.0811983	0.0970313	0.0612444	0.085753	0.0931273	0.0757761	0.071872	0.0694862	0.107442	0.0727396	0.0510506	0.0770774	0.107442	0.100068	0.0887895	0.0441101	0.06016	0.0575573	0.0625458	0.100935	0.0614613	0.0712214	0.0154805	0.0464959
	23	0.00864028	0.00276217	0.00798716	0.0354183	-0.00355136	-0.0129128	0.0128856	-0.0220565	-0.0211857	-0.00594614	0.0367246	0.0223559	0.0445621	-0.0179201	-0.0177024	0.00276217	0.00733403	-0.0255398	-0.00300709	0.00189134	-0.012042	-0.0285878	-0.0316357	-0.0409971	-0.00855864	-0.0135659	-0.0181378	-0.00768781	0.0262746	0.0406433	0.0484808	0.0519641	0.0809193	0.0985536	0.0911515	0.0924578	0.0920224	0.109004	0.0846203	0.146885
	24	0.0196919	0.0156294	0.00930994	0.00253907	-0.00603735	-0.0245444	0.00208768	-0.0116797	-0.00739152	-0.00648874	-0.00242623	-0.00197483	0.00840715	-0.0186763	-0.010777	-0.00332901	-0.0037804	-0.0299611	0.0147266	-0.0209332	0.00253907	0.00976133	-0.0155166	0.000507815	-0.0195791	0.0384246	0.104102	0.0490323	0.127574	0.137956	0.137279	0.110421	0.138182	0.141567	0.16188	0.095977	0.119675	0.155786	0.105908	0.108616
	25	0.0227083	0.0199135	0.0121738	-0.0385639	0.00980893	0.0134638	-0.0286743	-0.0172798	0.00658407	0.000564349	-0.00158555	-0.00803526	0.000134369	0.0334578	0.0399076	0.0362527	-0.00223052	-0.0196447	-0.0177098	-0.0093252	-0.0159899	-0.035984	-0.0303942	-0.0527532	-0.0600629	-0.0093252	0.030233	0.008304	0.0323829	0.0362527	0.0465722	0.0547419	0.0401225	0.031093	0.031093	0.0113139	-0.0209347	0.0100239	0.0143237	-0.00674532
	ΔF/F for Go stimulus when d'= 2
	Time from cue onset (ms) Trial #	-900	-800	-700	-600	-500	-400	-300	-200	-100	0	100	200	300	400	500	600	700	800	900	1000	1100	1200	1300	1400	1500	1600	1700	1800	1900	2000	2100	2200	2300	2400	2500	2600	2700	2800	2900	3000
	1	0.00723246	0.0198151	0.0311602	0.0136269	0.00929519	0.0177524	-0.0212333	-0.0230897	-0.030103	-0.0139106	-0.0136011	-0.0183454	-0.0127761	-0.00204984	-0.0113321	0.0255908	0.0218779	0.0536439	0.0746838	0.104387	0.128521	0.116351	0.124189	0.128521	0.122952	0.109131	0.1081	0.12584	0.166682	0.156368	0.128934	0.101087	0.114082	0.0705584	0.0872665	0.0693207	0.0623074	0.0790156	0.0202277	0.0362139
	2	-0.0180412	-0.0343643	-0.00987972	-0.00257732	-0.00300687	-0.00730241	-0.0036512	0.00773196	0.0283505	0.0347938	0.0214777	0.0171821	-0.00687285	0.00257732	-0.00515464	-0.000429553	0.0135309	0.0786082	0.0607818	0.0708763	0.0829038	0.138746	0.114905	0.138746	0.130584	0.140249	0.111254	0.120704	0.165808	0.170747	0.130799	0.1439	0.149699	0.151632	0.118557	0.0691581	0.104167	0.114691	0.130584	0.107174
	3	-0.00447231	0.0225507	0.00179703	0.0160652	-0.0180919	-0.0178757	-0.0116064	0.0035265	-0.011174	0.024064	0.0471957	0.0337923	0.0247125	0.0482766	0.0677332	0.0277391	0.0772453	0.0869736	0.0703274	0.10643	0.0997284	0.146208	0.130427	0.14383	0.13194	0.139506	0.171285	0.138858	0.144479	0.144911	0.135615	0.120698	0.13475	0.147073	0.125022	0.119834	0.109889	0.0884868	0.0848117	0.0716245
	4	0.00884192	-0.0209187	-0.02135	0.0135864	-0.013802	-0.0390339	0.0183308	0.0168212	0.0338581	-0.00258788	-0.0265258	-0.0157429	-0.00927324	-0.0131551	-0.0105672	-0.00237222	0.036446	0.0614622	0.070951	0.0463662	0.113867	0.115376	0.148372	0.141255	0.17231	0.153116	0.120121	0.164546	0.087341	0.135648	0.11667	0.112788	0.110416	0.0644813	0.110848	0.129178	0.125943	0.0940263	0.0838904	0.0849687
	5	-0.027171	-0.0337773	-0.00213106	-0.0324987	0.0216303	0.0214172	0.015024	0.000958977	0.0160895	0.00607352	0.0646777	0.0356953	0.0663825	0.0851359	0.0697922	0.0621204	0.0644646	0.035269	0.106233	0.103037	0.151199	0.130741	0.147576	0.155248	0.146084	0.151199	0.148215	0.126052	0.124774	0.115184	0.106233	0.0795951	0.113053	0.129036	0.0873735	0.123495	0.117102	0.117208	0.127757	0.108151
	6	0.0268663	0.0234387	-0.0150713	-0.0172892	-0.00599829	-0.000756086	-0.00478855	-0.0187005	0.0431977	-0.00660316	0.00246988	-0.00458692	-0.0144665	0.0401734	0.0365442	0.0339231	0.0559	0.0516659	0.0800948	0.0472302	0.0774737	0.0806996	0.0708201	0.0974343	0.101668	0.133323	0.100862	0.116185	0.12304	0.12304	0.103685	0.0932003	0.0796915	0.0790866	0.082111	0.0290841	0.0613438	0.0357377	0.0385604	0.0395685
	7	-0.0169761	-0.0159519	-0.0124696	0.0106773	0.00944821	0.00862886	0.00555627	0.0121111	0.0213289	-0.0100115	0.0373064	-0.0057099	-0.00284215	0.00238126	-0.00734861	-0.0532326	-0.0587633	-0.0532326	-0.015747	-0.0188196	0.00699014	-0.0110357	0.0596338	0.0864678	0.119242	0.166765	0.153655	0.146076	0.133171	0.102036	0.116784	0.113507	0.103469	0.104494	0.0856484	0.0319805	0.0612726	0.0577903	0.0315709	0.0205095
	8	0.0343432	0.0321644	-0.00850799	0.00726292	0.00560282	0.00850799	-0.0153559	-0.0153559	-0.0145258	-0.017431	-0.0122432	0.00124507	0.00933804	0.0197136	0.0207512	0.0396348	0.0796846	0.096078	0.133845	0.179498	0.141938	0.13177	0.117867	0.103548	0.106869	0.139863	0.109774	0.139656	0.137165	0.129902	0.106454	0.0852874	0.0710728	0.0906827	0.0825897	0.0674414	0.0574808	0.0489728	0.0412949	0.0554057
	9	-0.0112628	0.0269493	-0.00996011	-0.0203816	0.00892881	-0.0147366	0.00740902	0.00914593	0.0126198	-0.00648628	0.0708063	0.0215214	0.0356338	0.0252124	0.0382392	0.0134882	0.0182647	0.0482264	0.0404103	0.0395419	0.0278177	0.0990311	0.0829647	0.0975113	0.106413	0.0857872	0.0842674	0.116834	0.104676	0.0794909	0.091215	0.104676	0.079708	0.087307	0.106196	0.0901295	0.0862214	0.0838332	0.0517003	0.0627731
	10	0.000873363	-0.0323144	-0.00126152	0.0138768	-0.0109656	0.00494905	0.00999515	0.00281417	-0.0117419	0.0111596	0.00533722	0.00941291	-0.00630762	0.02164	0.0468705	0.0507521	0.0226104	0.0301795	0.0614265	0.0600679	0.0295973	0.0344493	0.00824842	0.000679282	0.0328967	0.0319262	0.031344	0.0235808	0.0185347	0.0243571	0.0311499	0.0247453	-0.0311499	-0.050558	0.00300825	0.0165939	-0.0427948	-0.0165939	-0.072295	-0.062591
	11	0.011139	-0.0203995	0.0191824	0.0100807	-0.00600609	0.0138907	-0.00198439	-0.0271729	-0.00346607	0.00478899	0.0253208	-0.00261939	0.0384442	0.0157957	0.00690568	0.0232041	0.0268025	0.010504	0.0911496	0.101098	0.0714645	0.0761212	0.0725228	0.0932663	0.0981347	0.145337	0.143008	0.130943	0.117185	0.113163	0.112316	0.0994047	0.057071	0.0723112	0.0534727	0.0617277	0.0388676	0.0370684	0.0367509	0.00648234
	12	-0.0135876	-0.00723208	0.00460224	-0.000657462	-0.00569801	0.0133684	0.0103002	0.00920447	-0.0107385	-0.00219154	-0.0361604	-0.0135876	-0.00153408	-0.0110673	-0.00986193	0.014245	-0.0110673	0.0151216	0.0135876	0.0479947	0.0552268	0.10366	0.114618	0.159763	0.118124	0.159763	0.193513	0.177296	0.233837	0.18387	0.162393	0.190007	0.161517	0.142231	0.124151	0.122507	0.118562	0.0359413	0.0344072	0.0344072
	13	-0.0251088	-0.00068296	-0.00561098	-0.00368262	-0.00732508	0.00917308	0.0236358	0.00360228	0.016458	0.000174088	0.0485973	0.0329561	0.0177436	0.0177436	0.0216003	0.020529	0.0288852	0.0271711	0.0372414	0.0248142	0.0237429	0.0288852	0.0428122	0.0481687	0.0644526	0.0740944	0.0646669	0.0670238	0.0689521	0.052454	0.0273853	0.0473117	0.0513827	0.0408838	0.0307064	-0.0049682	0.0320991	0.0145296	0.0168865	0.0417409
	14	0.0273622	-0.0065419	0.0164401	0.0171227	-0.00517663	-0.00426645	-0.00631435	-0.0201946	-0.0201946	-0.00517663	0.000739519	0.0148473	0.0426077	0.0237215	0.0016497	0.0476136	0.00961374	0.0708231	0.0583082	0.0671824	0.0999488	0.0776495	0.100859	0.0949428	0.0781046	0.101087	0.107685	0.114057	0.143182	0.129302	0.141817	0.121338	0.119518	0.13317	0.102679	0.102452	0.104727	0.0913021	0.0881165	0.0940327
	15	0.0065415	0.0153768	0.00608841	0.0140175	0.00201059	0.00269023	-0.00988305	-0.0107892	0.00586186	-0.0129414	-0.00637159	-0.00184068	0.021267	0.0223997	0.0523037	0.056608	0.0645371	0.105995	0.160819	0.150398	0.129782	0.16535	0.198199	0.194121	0.176224	0.184606	0.161272	0.1837	0.137711	0.114151	0.135672	0.0498117	0.101691	0.114151	0.149718	0.15289	0.141336	0.100105	0.0948942	0.0908164
	16	0.0704588	0.0225919	0.0262409	0.0273142	-0.0184062	-0.01304	-0.0308559	-0.0267776	-0.0254897	-0.0263483	-0.0392273	-0.00295144	-0.00144889	0.0232358	0.0198014	0.0202307	0.029246	0.0543601	0.0582238	0.012718	0.0650926	0.0492085	0.107379	0.112316	0.081406	0.164475	0.107593	0.112101	0.0964314	0.142796	0.15267	0.111886	0.0977193	0.120043	0.119614	0.119614	0.0874162	0.0791521	0.0723907	0.0586531
	17	-2.85185e-05	0.00156852	0.0157137	0.0271211	0.01617	-0.00846998	-0.0280907	-0.00367888	-0.00481962	-0.00778554	0.0298588	0.0081848	0.0846143	0.0551832	0.057921	0.0987595	0.0887209	0.0971624	0.0939683	0.107885	0.106288	0.13435	0.144389	0.14667	0.163097	0.127278	0.153515	0.128305	0.151233	0.154884	0.153629	0.158078	0.109026	0.123399	0.0843861	0.0891772	0.0665906	0.0878084	0.0727506	0.0410381
	18	-0.00346603	0.00225924	0.0018102	0.0256094	0.0202209	-0.0058235	-0.00634742	-0.00844292	-0.00268021	-0.0134572	-0.00896678	0.0314469	0.0476124	0.0278546	0.0350392	0.043571	0.0514292	0.0390806	0.104865	0.0857808	0.151116	0.166608	0.149096	0.119908	0.131583	0.136298	0.143707	0.156505	0.171997	0.155158	0.13787	0.137421	0.133379	0.0830866	0.0753406	0.0561441	0.102171	0.0702889	0.0664721	0.065125
	19	0.0112267	-0.0324723	-0.00524279	-0.0131481	-0.0113914	-0.0254454	0.00376053	0.00463891	0.0338448	0.0156186	0.013203	0.0168263	-0.0179792	0.02023	0.0235239	0.0246219	0.0305509	0.0619527	0.0632703	0.0373583	0.102138	0.138371	0.153084	0.152425	0.181411	0.12805	0.12827	0.132662	0.150229	0.13914	0.144081	0.122121	0.0992836	0.0777634	0.112679	0.109385	0.104993	0.103456	0.108946	0.108067
	20	-0.0221233	-0.0198702	-0.00409796	-0.000492881	0.0137021	0.0112236	0.0129135	-0.00454859	-0.00544986	0.0114489	0.0071679	0.0375857	0.0184338	0.0402895	0.042768	0.0296996	0.0260945	0.0788188	0.0652997	0.0549351	0.0639478	0.0607934	0.0979707	0.109237	0.109913	0.119151	0.12929	0.116897	0.113067	0.158581	0.143935	0.112616	0.108335	0.0990973	0.100111	0.0977454	0.0740871	0.0393883	0.0630466	0.0646238
	21	-0.0110298	-0.00893997	0.0175316	-0.00522466	-0.0186927	0.0147452	0.0221758	-0.00592128	0.0133519	-0.0110298	0.0128875	0.0031348	0.000812725	0.0377337	0.0172994	0.0175316	0.0142807	0.0556136	0.0730291	0.0690816	0.0809242	0.09416	0.128527	0.141066	0.141995	0.136422	0.150819	0.132706	0.131778	0.19099	0.162661	0.186114	0.18205	0.185185	0.149657	0.138279	0.101707	0.121212	0.0895158	0.099733
	22	-0.011662	0.0129884	-0.0113303	0.00215553	0.00105013	-0.0201735	0.0112198	-5.52698e-05	-0.00071851	0.0136517	-0.0100039	0.00701929	0.0231581	0.00746145	0.0169679	0.0315592	0.0691428	0.07268	0.0936826	0.118001	0.117559	0.143868	0.104294	0.0989886	0.126624	0.111811	0.107169	0.127729	0.122644	0.110485	0.0992096	0.0976621	0.0978832	0.086387	0.0595258	0.0939037	0.0905875	0.100536	0.0956724	0.100315
	23	-0.0138471	-0.00673301	-0.00447456	-0.00537794	-0.0107982	-0.0026678	0.0043334	0.0248853	0.0104312	0.00207495	0.0275955	0.032564	0.0551486	0.0266921	0.0147223	0.0138189	0.00252664	-0.00853977	-0.00108688	0.00817277	0.0160774	-0.00673301	0.0210459	0.0149481	0.0339191	0.037081	0.0709577	0.0831534	0.0903804	0.108448	0.132162	0.134194	0.0989625	0.089477	0.0910579	0.0836051	0.0937681	0.0696027	0.0565036	0.0637307
	24	-0.00875814	-0.0244779	-0.0152706	-0.000673703	0.0226813	0.0240287	0.011453	-0.0220076	0.0177408	0.00359308	0.0069616	0.0206602	0.008309	-0.0175163	-0.00583876	0.0437907	0.0139232	0.0159443	0.0397485	0.108017	0.109926	0.0981361	0.0897148	0.103077	0.128228	0.100157	0.0936447	0.134516	0.118796	0.144172	0.179205	0.103526	0.0900517	0.071188	0.0815181	0.0851112	0.0753425	0.0410959	0.0572648	0.0372782
	ΔF/F for No-Go stimulus when d'= 2
	Time from cue onset (ms) Trial #	-900	-800	-700	-600	-500	-400	-300	-200	-100	0	100	200	300	400	500	600	700	800	900	1000	1100	1200	1300	1400	1500	1600	1700	1800	1900	2000	2100	2200	2300	2400	2500	2600	2700	2800	2900	3000
	1	-0.0204613	-0.0178562	0.00645862	-0.0243691	-0.0434735	0.0160109	0.0177476	0.0227408	0.00993216	0.0251289	0.00949796	0.0379376	-0.0252374	0.00298508	0.0121031	0.0142741	-0.0126459	-0.0130801	-0.0046133	-0.0269742	-0.00374491	-0.0161194	-0.0132972	-0.0245862	-0.00483039	-0.0145997	0.0147083	0.0331615	0.0642062	0.072673	0.0956852	0.0824423	0.0826594	0.092863	0.108277	0.12152	0.0813569	0.0377205	0.0342469	0.0531343
	2	0.013273	0.0198762	-0.00632364	-0.0218731	0.00794781	0.00411369	-0.00909272	0.00230314	-0.000572456	-0.00887972	-0.0125008	-0.0125008	-0.000572456	0.00304866	-0.00419357	-0.00312854	-0.00163749	-0.0269853	-0.0318844	0.00496572	-0.00611063	-0.0103708	-0.00142448	0.0262664	0.0394728	0.0354257	0.0650336	0.0895294	0.0837782	0.135539	0.140864	0.169833	0.140651	0.115303	0.123397	0.127658	0.0869733	0.128936	0.102949	0.11296
	3	-0.00709333	0.00845078	-0.00283467	-0.000918274	-0.00389934	-0.00730626	-0.0173141	0.011006	0.0112189	0.0144129	0.0399649	0.0361321	0.0799963	0.0557219	0.05849	0.07446	0.0748859	0.0544443	0.0670074	0.052315	0.101077	0.0782928	0.0663686	0.0199492	0.0484822	0.0758441	0.0736083	0.0951145	0.101715	0.106826	0.118324	0.102993	0.133868	0.0931981	0.0799963	0.111084	0.0914947	0.0621099	0.120454	0.104058
	4	-0.00349345	0.0227074	-0.000655022	-0.010917	-0.0220524	0.00174672	0.0010917	0.00480349	0.0165939	0.00524017	0.0200873	0.0246725	0.0475983	0.0639738	0.0572052	0.0624454	0.0489083	0.0432314	0.0825327	0.0323144	0.0228166	0.0257642	0.0296943	0.0255459	0.0213974	-0.0194323	0.00873362	0.0519651	0.0524017	0.0748908	0.109825	0.116594	0.152183	0.107424	0.123799	0.112227	0.0995633	0.117249	0.115284	0.0864629
	5	-0.0163298	-0.00706009	0.0110482	-0.00361089	0.00759903	0.0270008	0.0216114	0.00565885	-0.0329291	-0.0212881	-0.00619779	-0.00393425	-0.00404204	-0.00339531	0.00393425	0.0295877	0.0142819	-0.0225815	0.0155753	-0.00706009	-0.00188628	-0.00835354	-0.00253301	-0.0344382	-0.0462948	-0.0135274	-0.00361089	0.0198868	0.0192401	0.00824576	0.0108327	-0.00835354	-0.0236594	-0.0139585	-0.0212881	-0.00576664	-0.0156831	-0.0115872	-0.0225815	-0.0262463
	6	0.0205016	-0.00212829	-0.0215254	-0.00816294	-0.00299038	0.0233034	-0.0109647	0.00929443	0.00132008	-0.00148172	0.0108031	0.042916	0.0293381	0.0390366	0.0485196	0.0582182	0.0463644	0.0302002	0.0228724	0.00563054	0.00207441	-0.0137665	0.00800129	-0.000404106	0.0198551	0.0314933	0.0590803	0.0595113	0.0724427	0.0580026	0.033433	0.0616665	0.0633907	0.0198551	0.0403298	0.0215792	0.0118807	0.000457986	-0.00773189	0.0282605
	7	-0.00501174	0.00619259	0.00795013	0.00179873	-0.00391328	-0.0107238	-0.0159964	-0.00874652	0.0167378	0.0187151	0.00179873	0.0198135	0.0277225	0.0279422	0.0360708	0.0114652	0.0149803	0.0277225	0.0191545	0.0228892	0.00135935	0.00970767	-0.00171635	0.0143212	0.0281619	0.0479342	0.0526209	0.0603103	0.0619945	0.0382677	0.0202529	0.00443505	0.0389268	0.00970767	0.0472751	0.054525	0.0202529	0.0222302	0.023768	0.0202529
	8	0.0047485	-0.020501	-0.00184822	0.0163496	0.00975291	-0.00321306	0.000426512	-0.0318747	-0.00639768	0.025676	0.0113452	0.026131	0.0673036	0.0370497	0.0557025	0.101879	-0.00548779	0.0436464	0.0334101	0.0231738	0.0340925	0.0227189	0.0231738	0.0234013	0.021354	0.0206716	0.0609343	0.0754926	0.0709432	0.133043	0.130314	0.159203	0.129631	0.163297	0.154881	0.191049	0.151469	0.17831	0.146919	0.146464
	9	-0.0581769	-0.0700486	-0.0276182	-0.0300366	-0.00453434	0.0310808	0.0181099	0.0229465	0.0702135	0.0486686	0.0363571	0.0433922	0.0297617	0.0469098	0.0743906	0.106708	0.13309	0.126934	0.125395	0.164748	0.112424	0.124296	0.127594	0.125615	0.0398747	0.0985737	0.111545	0.101212	0.0987936	0.100333	0.137706	0.102751	0.100113	0.103191	0.0662563	0.116381	0.036577	0.063838	0.0403144	0.0506472
	10	-0.0281144	-0.0326691	-0.0272468	-0.017053	-0.0216077	-0.00794361	0.0297953	0.0475803	0.00897384	0.0239393	0.0449776	0.0317473	0.0488817	0.0532195	0.0556053	0.0974651	0.0811983	0.0970313	0.0612444	0.085753	0.0931273	0.0757761	0.071872	0.0694862	0.107442	0.0727396	0.0510506	0.0770774	0.107442	0.100068	0.0887895	0.0441101	0.06016	0.0575573	0.0625458	0.100935	0.0614613	0.0712214	0.0154805	0.0464959
	11	0.00864028	0.00276217	0.00798716	0.0354183	-0.00355136	-0.0129128	0.0128856	-0.0220565	-0.0211857	-0.00594614	0.0367246	0.0223559	0.0445621	-0.0179201	-0.0177024	0.00276217	0.00733403	-0.0255398	-0.00300709	0.00189134	-0.012042	-0.0285878	-0.0316357	-0.0409971	-0.00855864	-0.0135659	-0.0181378	-0.00768781	0.0262746	0.0406433	0.0484808	0.0519641	0.0809193	0.0985536	0.0911515	0.0924578	0.0920224	0.109004	0.0846203	0.146885
	12	0.0196919	0.0156294	0.00930994	0.00253907	-0.00603735	-0.0245444	0.00208768	-0.0116797	-0.00739152	-0.00648874	-0.00242623	-0.00197483	0.00840715	-0.0186763	-0.010777	-0.00332901	-0.0037804	-0.0299611	0.0147266	-0.0209332	0.00253907	0.00976133	-0.0155166	0.000507815	-0.0195791	0.0384246	0.104102	0.0490323	0.127574	0.137956	0.137279	0.110421	0.138182	0.141567	0.16188	0.095977	0.119675	0.155786	0.105908	0.108616
	13	0.0227083	0.0199135	0.0121738	-0.0385639	0.00980893	0.0134638	-0.0286743	-0.0172798	0.00658407	0.000564349	-0.00158555	-0.00803526	0.000134369	0.0334578	0.0399076	0.0362527	-0.00223052	-0.0196447	-0.0177098	-0.0093252	-0.0159899	-0.035984	-0.0303942	-0.0527532	-0.0600629	-0.0093252	0.030233	0.008304	0.0323829	0.0362527	0.0465722	0.0547419	0.0401225	0.031093	0.031093	0.0113139	-0.0209347	0.0100239	0.0143237	-0.00674532
	14	0.00784187	0.00977549	0.0192287	0.0102052	-0.0359867	0.00075196	-0.00247073	0.0037598	-0.0168654	0.00569341	0.0106349	-0.000322269	0.00333011	0.00633795	-0.00762703	-0.00268557	-0.00827157	-0.0190139	0.00397465	-0.0589752	-0.0258889	-0.000966806	-0.00977549	0.0127833	-0.0241702	0.00268557	0.0114943	0.0190139	0.0213772	0.0114943	0.0183693	-0.0254592	-0.0293265	-0.0248147	0.00547857	-0.0280374	-0.0273928	-0.0168654	-0.0293265	-0.0284671
	15	0.00224404	0.0260336	0.0131476	0.0066495	-0.00502499	-0.00921018	-0.009871	-0.00458444	-0.00392362	-0.00568581	-0.025951	-0.0118535	0.000922395	-0.0105318	0.00202376	0.00268458	-0.0100913	-0.0184617	0.00642923	-0.00128034	0.0066495	-0.00700745	-0.00403376	0.00312513	-0.030797	-0.00436417	0.0123766	0.0322012	0.0687666	0.0337431	0.0474001	0.0396905	0.0337431	0.0167821	0.00885224	0.0194254	0.0174429	-0.0114129	-0.00172089	-0.0239685
	16	-0.010421	0.00395279	-0.026785	-0.0221411	-0.00688283	0.00660641	0.00572187	0.00351052	0.0397767	0.020759	0.0450839	0.0132405	0.064986	0.069851	0.0559195	0.0853305	0.0561406	0.0393344	0.0448628	0.064986	0.0897532	0.0999254	0.0798021	0.104348	0.0786964	0.0377864	0.0641015	0.0674185	0.0888686	0.0749371	0.074716	0.0999254	0.127125	0.115847	0.119606	0.172015	0.121375	0.109434	0.0893109	0.0709567
	17	-0.00601996	-0.0218533	0.0254268	-0.001182	-0.0152561	-0.0222931	0.000357349	-0.00909866	0.010693	0.0219082	0.0111328	0.0536848	0.0480772	0.0568735	0.0181698	-0.013057	-0.00558014	-0.0156959	-0.0167954	-0.0139366	-0.0181148	0.0111328	-0.00964842	-0.0216334	-0.0315292	-0.0132769	0.0190495	0.0236675	0.0340031	0.027186	0.0375216	0.0265263	0.00717447	0.010693	0.0384013	0.0252069	0.0368619	0.00783419	-0.000742186	-0.0172352
	18	-0.00817558	0.0188203	-0.00400549	0.00565158	0.00323731	0.00609053	0.00521262	-0.00971193	-0.0110288	0.00367627	0.00828532	0.0159671	0.0719342	0.0240878	0.0301235	0.0148697	-0.000932785	0.00257888	-0.0283676	-0.0154184	-0.0215638	-0.0342936	-0.0316598	-0.0301235	0.00389575	0.00301783	-0.0211248	0.0600823	0.0640329	0.058546	0.0706173	0.0745679	0.0754458	0.0170645	0.0085048	0.0161866	-0.00861454	-0.0122359	-0.00268861	-0.0215638
	19	-0.0395982	-0.00566485	-0.0034324	-0.00209293	0.0309474	0.00460444	0.00505093	0.00706014	0.00817636	-0.00253942	0.0063904	0.0601925	0.0238035	0.0921166	0.116897	0.114888	0.0985908	0.0939026	0.076043	0.112209	0.109753	0.0943491	0.0930096	0.0959118	0.10819	0.103725	0.0947956	0.0934561	0.0876517	0.134533	0.156188	0.130961	0.142793	0.132747	0.109307	0.137659	0.139221	0.128059	0.0809544	0.0990373
	20	-0.0179427	-0.0179427	0.00100301	-0.0339909	-0.00211746	-0.00813552	0.0183885	0.0117018	-0.00278614	0.0203945	-0.00947286	0.0154909	0.00702106	0.0139307	0.0216204	0.0306475	0.0134849	0.0257439	0.00144879	-0.000557227	0.00278614	0.00568372	0.0101415	0.0402318	0.0721052	0.0542739	0.0894907	0.120027	0.104647	0.107768	0.108102	0.118912	0.112226	0.102864	0.146551	0.104201	0.110442	0.0926112	0.120695	0.0504848
	21	-0.0149904	0.00636093	-0.00146791	0.00446303	0.032457	0.0158504	-0.00929674	-0.0141601	-0.00692437	-0.00241686	-0.00550094	0.0345922	0.0158504	0.00327684	0.0277123	0.00446303	-0.013567	-0.0221076	0.00802159	-0.0116691	-0.0387142	0.014427	0.00446303	-0.00490785	-0.00882227	0.00920778	-0.0287502	0.0367273	0.0908174	0.0656703	0.0901057	0.0808535	0.0872589	0.0765832	0.0727874	0.0889195	0.118337	0.0889195	0.0580787	0.057367
	22	-0.00427103	0.0254884	0.0188752	-0.00801852	0.000358216	0.00785319	0.00168086	0.00278306	-0.0221267	-0.0210245	-0.0269764	-0.0133091	-0.0185997	-0.0197019	-0.00647543	0.0052079	0.0581136	0.110578	0.120057	0.127332	0.147612	0.150699	0.178033	0.174947	0.141881	0.142763	0.124246	0.12138	0.118073	0.141881	0.129536	0.0889752	0.15136	0.153344	0.138795	0.147612	0.115649	0.160839	0.133063	0.147833
	23	-0.0322362	0.00450857	0.00247971	-0.000901713	-0.00191614	-0.0302074	0.034716	0	0.00112714	0.00969342	0.0225428	0.0211903	0.0581605	-0.00766456	0.00495942	0	0.00518485	-0.0405771	-0.0290803	-0.0360685	-0.00811542	-0.00270514	-0.0172453	-0.012624	0.00856628	-0.00405771	0.018936	0.0238954	0.0216411	0.0281785	0.00541028	0.00586114	0.0333634	0.00541028	0.0137511	0.0369702	0.0403517	0.0529757	0.0351668	0.037872
	24	-0.00540153	0.00319317	0.00199946	-0.000626697	-0.00587902	0.00605807	0.0113104	-0.0111313	-0.00253663	0.00605807	0.00462562	0.0316034	-0.00969889	0.0425856	0.036617	0.0581038	0.0306485	0.0189501	0.0287385	0.00367066	0.030171	0.0289773	-0.0111313	0.0194276	0.00605807	0.0261124	0.023725	0.0242025	0.0246799	0.0244412	0.0464054	0.0361395	0.0338715	0.0442568	0.0175177	0.052374	0.0039094	0.0139366	-0.00778895	-0.00802769
	25	0.0093151	0.0138452	0.00319941	-0.025567	0.0113537	0.0111272	0.00908859	-0.0237549	-0.00608737	-0.00586087	0.0224525	0.0380815	0.0614117	-0.0194513	-0.0237549	-0.0382514	-0.0142416	-0.0101645	-0.0165067	-0.0436875	-0.0350803	-0.0559189	-0.0631671	-0.0298706	-0.0622611	-0.026473	-0.0464056	0.0093151	0.00161386	0.0145248	0.000481327	-0.0124296	-0.0212633	-0.00472833	-0.0174127	-0.0101645	-0.0316827	-0.0330417	-0.0432345	-0.0291911
	26	0.0109598	-0.0103236	0.0100344	-0.000144588	0.00748966	0.0100344	0.0222955	-0.013331	-0.0413233	-0.0165698	0.019288	0.0111911	-0.0232787	0.00401955	0.0102658	0.00957173	-0.0207339	-0.0114803	-0.0110176	-0.00893554	-0.00986091	0.000780776	0.00170614	0.0204448	0.000318094	0.0151239	0.0502877	0.0778173	0.057228	0.0808247	0.0648622	0.0229895	0.0144299	0.00355687	0.0141985	-0.002458	-0.00338336	8.67527e-05	0.0123478	0.0338625
	ΔF/F for Go stimulus when d'= 2.5
	Time from cue onset (ms) Trial #	-900	-800	-700	-600	-500	-400	-300	-200	-100	0	100	200	300	400	500	600	700	800	900	1000	1100	1200	1300	1400	1500	1600	1700	1800	1900	2000	2100	2200	2300	2400	2500	2600	2700	2800	2900	3000
	1	0.00647698	0.0279898	0.0099468	0.01226	-0.00462642	0.0067083	0.0067083	-0.0164238	-0.0173491	-0.0168864	-0.0293777	0.0104094	0.0275272	0.0191996	-0.025214	0.00855887	0.0342355	0.0270645	0.0226694	0.0395559	0.0608374	0.0765672	0.107102	0.117511	0.143188	0.128846	0.12607	0.13833	0.137173	0.145154	0.143419	0.119593	0.0853574	0.0654638	0.0707842	0.0543604	0.0511219	0.0191996	0.018737	0.0116817
	2	0.0409311	0.00787019	0.00835638	0.0071409	0.0132183	-0.0397764	-0.00890334	-0.0526604	-0.0193564	0.0211188	0.0244006	0.0200249	0.0112735	0.0363123	-0.00501383	0.0107873	-0.00671549	0.0209973	0.00373758	0.0380139	0.0307211	0.0594062	0.0666991	0.104865	0.180954	0.149594	0.172202	0.148865	0.145462	0.157616	0.157373	0.142545	0.13671	0.145948	0.126257	0.142545	0.13039	0.114832	0.0929533	0.110213
	3	0.0316703	-0.0234834	-0.0160968	0.0104952	0.0178819	-0.0210212	-0.00477055	-0.0227448	0.00261611	0.00975655	0.052353	0.0173894	0.0686036	0.07796	0.114893	0.172509	0.186298	0.167092	0.222246	0.249084	0.243421	0.205503	0.207719	0.260164	0.222246	0.214613	0.217814	0.253024	0.231603	0.214367	0.224955	0.234557	0.217076	0.194669	0.15552	0.140993	0.159952	0.155028	0.170047	0.133606
	4	-0.0346576	-0.000716293	-0.0161441	-0.0126178	-0.0205521	-0.00556504	0.0175767	0.011626	0.0248499	0.0391757	0.0200011	0.0160339	0.0244091	0.0252906	0.0289272	0.0305802	0.0393961	0.0834757	0.0386247	0.048212	0.0576891	0.0795085	0.111025	0.104854	0.0993443	0.114331	0.153121	0.111246	0.143865	0.128216	0.100446	0.0728966	0.0530608	0.0314618	0.0451265	0.0416001	0.00898121	0.00611604	-0.0478814	-0.0218745
	5	0.0129268	-0.0160976	-0.00243902	0.00390244	0.0241463	0.0121951	-0.0231707	-0.0212195	0.00536585	0.00707317	0.0278049	0.0290244	0.0321951	0.077561	0.114146	0.167317	0.15939	0.166341	0.160488	0.178537	0.211463	0.197561	0.177805	0.196829	0.208293	0.207805	0.207805	0.207073	0.206341	0.203415	0.191951	0.162927	0.157073	0.133171	0.15439	0.160976	0.132927	0.122195	0.143902	0.0973171
	6	0.0134879	-0.0377327	-0.0187981	-0.00131996	0.00863285	0.0088756	0.00414195	0.0132451	0.00693359	-0.00908801	0.0282957	0.0372775	0.0549984	0.0812156	0.0807301	0.0855851	0.164965	0.153556	0.12928	0.176374	0.190818	0.183171	0.1839	0.144088	0.156469	0.191668	0.191425	0.173704	0.125882	0.152827	0.162537	0.173461	0.16982	0.179287	0.143603	0.18657	0.157682	0.163266	0.180744	0.168363
	7	-0.0360108	-0.0221844	0.00705482	-0.0267177	-0.0103981	0.00773481	-0.00473155	0.0356141	0.0113614	0.0233744	0.0372007	0.0440006	0.0471738	0.0850262	0.0576002	0.0322142	0.081853	0.0929593	0.0877461	0.106106	0.125599	0.125599	0.124012	0.111546	0.124239	0.140331	0.123332	0.162771	0.130585	0.19269	0.182037	0.0974926	0.143051	0.111772	0.105879	0.0902394	0.0711999	0.0591869	0.0625868	0.0308542
	8	0.0202544	-0.000594884	0.00756352	0.0247868	-0.00308773	0.0134557	0.0177615	-0.0513583	-0.00875329	-0.00558058	0.00257783	0.00303108	-0.0354947	-0.00694031	0.0148154	0.0524348	0.0605932	0.0841619	0.0798561	0.0488088	0.058327	0.126767	0.119515	0.145123	0.099119	0.119968	0.144443	0.117475	0.115436	0.135605	0.1279	0.104105	0.135605	0.121328	0.0644458	0.0809892	0.0834821	0.104105	0.0828022	0.0898275
	9	-0.0108475	-0.00319044	0.000522072	0.00701897	-0.0159522	0.00330646	-0.00551076	0.0169963	0.0302222	-0.00388654	-0.0180405	0.0169963	0.0102674	0.0304542	0.0102674	0.00237833	0.0277858	0.0374152	0.0406636	0.0376472	0.0736122	0.0928708	0.139509	0.115146	0.144382	0.142526	0.139277	0.156216	0.125355	0.168745	0.133244	0.118394	0.11677	0.0947271	0.0926388	0.0715239	0.0719879	0.0615465	0.0334706	0.0487847
	10	0.0129098	0.0165895	0.0160989	-0.0206985	0.00187053	-0.0123578	-0.00965932	-0.0157922	-9.19935e-05	0.0028518	0.0386679	0.0187973	0.0107019	0.0364601	0.047254	0.0411211	0.10613	0.0842967	0.107847	0.17261	0.166723	0.183404	0.180093	0.177762	0.182914	0.222655	0.17997	0.197633	0.20303	0.192236	0.19518	0.157401	0.16844	0.196161	0.142927	0.141701	0.12919	0.0987704	0.114716	0.121339
	11	-0.0293633	-0.0205688	0.020858	0.0289583	-0.00529407	0.00442619	-0.00529407	-0.0157086	0.019238	0.0187751	0.0284954	-0.00378974	0.0340498	0.0356699	0.0259496	0.00535193	0.0553418	0.0761709	0.140741	0.154859	0.149304	0.145138	0.182399	0.158562	0.15347	0.184482	0.173836	0.134261	0.121532	0.153702	0.153239	0.113663	0.107415	0.118292	0.107877	0.0845026	0.10429	0.0914456	0.102554	0.119218
	12	-0.00250569	0.0104784	-0.00546697	0.0259681	-0.00751708	-0.00592255	-0.0118451	-0.0125285	0.00410023	0.0225513	0.0346241	0.0161731	0.00182232	0.0318907	0.00888383	0.0569476	0.0166287	0.0710706	0.081549	0.0929385	0.0526196	0.0751708	0.0735763	0.0796128	0.0892939	0.130296	0.110251	0.117312	0.131663	0.135308	0.144191	0.0856492	0.094533	0.0938497	0.121412	0.0838269	0.0822323	0.0676538	0.0551253	0.0405467
	13	-0.00655022	0.00533722	-0.0126152	0.00194081	0.0147986	-0.00970403	-0.013343	-0.0002426	-0.0131004	0.0257157	0.0921883	0.0560408	0.0645318	0.0524017	0.0817564	0.110626	0.106744	0.0839398	0.149685	0.161087	0.168365	0.164968	0.172732	0.167031	0.165454	0.167637	0.177098	0.180374	0.181465	0.1623	0.159389	0.135371	0.128821	0.150412	0.144347	0.118389	0.148229	0.145318	0.149927	0.150412
	14	-0.000976748	-0.0226693	0.00707049	0.00998615	0.0438079	-0.0133392	-0.0212698	-0.0126394	0.0305124	-0.0182375	-0.00307603	0.0230483	-0.000743494	0.0139515	0.0466069	0.0221153	-0.00214301	0.0407756	0.0592026	0.0757635	0.0906917	0.100022	0.15437	0.137576	0.154137	0.155769	0.160668	0.162456	0.165022	0.168598	0.139908	0.140375	0.13431	0.10562	0.0874262	0.033778	0.0846272	0.0608353	0.0505722	0.0981558
	15	-0.0132497	0.0645379	0.00187567	-0.000285101	-0.0214126	-0.0190117	0.00295605	0.00163558	0.00547694	0.00283601	-0.0218928	-0.00364629	0.0424501	0.00331618	0.00955839	0.0150804	0.00643729	-0.0166109	0.0578155	0.103912	0.0981498	0.101031	0.0993503	0.116396	0.172576	0.134643	0.160572	0.15625	0.15625	0.131042	0.1272	0.123599	0.148568	0.107273	0.113755	0.152889	0.133442	0.0952688	0.0856654	0.0964692
	16	0.0131397	0.0313509	0.0244352	-0.00599355	-0.0133702	-0.00184417	-0.010604	-0.00161365	-0.00230521	-0.0225911	0.00138313	-0.000230521	-0.0193638	-0.0101429	-0.0119871	-0.00230521	0.0131397	0.00599355	0.0783771	0.0945136	0.0594744	0.114338	0.108114	0.13278	0.138774	0.130705	0.105579	0.135777	0.122176	0.109959	0.129553	0.127709	0.0952052	0.0885201	0.0843707	0.0977409	0.0567082	0.0665053	0.0640848	0.0525588
	17	-0.00521185	-0.0135508	-0.0169845	-0.0184561	0.005825	0.018824	0.0386903	0.0185787	0.0217671	-0.0451898	0.0129376	0.0568398	0.0634619	0.0507082	0.0364829	0.0781777	0.0852903	0.0649335	0.13606	0.143418	0.163039	0.18315	0.179104	0.188546	0.185603	0.160586	0.171868	0.16402	0.220921	0.195414	0.18732	0.16402	0.180943	0.160586	0.148323	0.151266	0.152002	0.111779	0.103195	0.102459
	18	-0.0135113	0.0211066	-0.00467523	-0.0181108	0.0027083	-0.00164919	0.00488705	-0.00261752	0.0211066	0.00198206	0.0240116	0.00682372	0.0244958	0.022075	0.0276429	0.0414416	0.0842903	0.0845324	0.113582	0.148442	0.145537	0.16442	0.160304	0.188628	0.169746	0.168051	0.167809	0.173135	0.180397	0.201701	0.224941	0.182334	0.201701	0.126655	0.140696	0.157157	0.150137	0.092037	0.103899	0.0925211
	19	0.0116024	-0.00894156	-0.00399121	0.000959129	0.00219671	-0.00696142	0.00318678	0.0049194	-0.0178522	-0.00151604	0.0064045	0.0234832	0.0643235	0.0828873	0.0809072	0.071749	0.11952	0.139569	0.16234	0.178181	0.167414	0.194517	0.180904	0.199963	0.207883	0.196003	0.197488	0.195755	0.168776	0.228922	0.164815	0.125708	0.16531	0.124223	0.140559	0.133628	0.0987284	0.0863525	0.120757	0.129421
	20	-0.0275538	0.0174468	0.0280351	0.0381422	-0.00348935	0.00300806	0.0058958	-0.0155216	-0.0225003	-0.00541451	0.062688	0.00240645	-0.00806161	-0.00782096	0.0309229	0.047768	0.0773673	0.077608	0.146432	0.138251	0.137769	0.123331	0.174347	0.167609	0.166165	0.170256	0.170978	0.184454	0.193118	0.1717	0.144267	0.119962	0.139935	0.130069	0.118999	0.112742	0.121044	0.101672	0.106485	0.099266
	21	0.029808	0.0204371	0.0140255	-0.0155667	0.0034216	-0.00668907	-0.00619586	-0.023458	-0.0170463	-0.00816868	-0.0190191	0.00860023	0.0120526	0.0349866	0.0500293	0.0549613	0.116118	0.128449	0.12475	0.130421	0.170617	0.153109	0.188126	0.176782	0.170864	0.228815	0.189606	0.193305	0.181714	0.192072	0.186893	0.172344	0.17259	0.148177	0.152122	0.141765	0.120804	0.12253	0.095404	0.132148
	22	-0.000588848	-0.00372937	-0.00481648	0.0155969	-0.00493727	-0.0235388	-0.00880252	-0.0184657	0.0407211	0.0230859	0.0358895	0.0305748	0.0653621	0.0627048	0.0793737	0.106914	0.149673	0.110779	0.139044	0.137836	0.164409	0.147982	0.197747	0.203545	0.229153	0.210793	0.222388	0.173106	0.163926	0.155713	0.156075	0.137353	0.144358	0.146049	0.162718	0.146049	0.130588	0.154746	0.122375	0.13397
	23	0.0272712	0.00651587	0.00365306	0.0120029	-0.0140009	-0.0395276	0.0196371	-0.00398109	-0.0108995	-0.0166252	-0.00517393	0.0358597	0.0554222	0.0296569	0.0547065	0.0969329	0.111724	0.135581	0.164447	0.152281	0.158245	0.168503	0.17566	0.184129	0.188066	0.200948	0.18234	0.198801	0.211922	0.189974	0.151326	0.136535	0.155621	0.106476	0.129378	0.131764	0.152758	0.140591	0.150372	0.0897759
	24	0.000421493	-0.0172522	0.0169324	0.0155371	0.0136767	-0.00143889	0.00483991	-0.00120634	-0.0442277	-0.0109734	-0.0126012	-0.0372513	-0.0251588	-0.0126012	0.0104211	0.0273971	0.059605	0.0697208	0.0780925	0.100417	0.132741	0.157159	0.156461	0.127858	0.129718	0.171577	0.13995	0.133904	0.136695	0.132276	0.0918129	0.0864643	0.0957662	0.075302	0.0815807	0.111579	0.0485589	0.0520472	0.0532099	0.0764647
	25	0.0110113	-0.0288562	0.00886276	0.00456567	0.0172182	-0.0197845	0.000507296	-0.00617708	-0.0288562	0.00504312	0.0217541	0.0207991	-0.0011638	0.0487303	0.0420459	0.00504312	0.0671123	0.0761839	0.103876	0.115813	0.122258	0.111516	0.145654	0.150428	0.130136	0.160216	0.182179	0.197696	0.17263	0.207245	0.183373	0.210826	0.18385	0.125362	0.167617	0.168333	0.167617	0.165229	0.141595	0.107457
	26	-0.0188874	-0.0340336	-0.010042	-0.00592218	-0.00398346	0.00425609	0.00886055	0.0212199	0.0236433	0.00886055	0.00764885	0.0202505	-0.00592218	0.0675068	0.027036	0.05127	0.0551474	0.0706572	0.0815625	0.061933	0.13003	0.154991	0.15172	0.149418	0.153537	0.159596	0.158869	0.187223	0.208306	0.161777	0.178014	0.174379	0.160323	0.152568	0.124457	0.11234	0.131	0.129546	0.1041	0.120822
	ΔF/F for No-Go stimulus when d'= 2.5
	Time from cue onset (ms) Trial #	-900	-800	-700	-600	-500	-400	-300	-200	-100	0	100	200	300	400	500	600	700	800	900	1000	1100	1200	1300	1400	1500	1600	1700	1800	1900	2000	2100	2200	2300	2400	2500	2600	2700	2800	2900	3000
	1	0.0173328	0.0175693	0.0165054	0.0161507	0.001256	0.0265534	0.00338382	-0.026642	-0.0472109	-0.0183672	-0.0301884	-0.0332619	-0.0316069	-0.0162394	-0.00891023	-0.0056003	-0.045556	-0.0178943	-0.0602143	-0.0443738	-0.045556	-0.0689619	-0.0424825	-0.02215	-0.0297156	-0.0375175	0.0133136	0.01686	0.0109494	-0.00985593	0.00362024	-0.0349169	-0.0304248	-0.0150573	-0.0608053	-0.0150573	-0.0304248	-0.0900037	-0.0216771	-0.0105652
	2	-0.00236827	-0.025222	-0.0256957	0.0406157	0.042984	0.00840734	0.00319716	-0.0162226	-0.00746004	-0.0100651	0.0500888	0.0474047	0.0478784	0.0477205	0.0247484	0.0339846	0.0304322	0.0505625	0.0690349	0.0723505	0.10077	0.141978	0.12611	0.103138	0.181764	0.141741	0.163055	0.165423	0.177501	0.167792	0.144109	0.176554	0.14032	0.135346	0.105033	0.0652457	0.104085	0.0775607	0.0747188	0.067614
	3	0.00983081	-0.0103855	0.0103239	-3.08176e-05	-0.00545471	-0.00249622	0.00711886	0.0061327	-0.00939936	-0.0167956	-0.0158094	0.0438534	0.0364572	0.0495239	0.0394157	0.0315264	0.0327591	0.00835157	0.0344849	0.0818207	0.0899565	0.110419	0.0946408	0.0569201	0.0443465	0.0889704	0.0971062	0.136306	0.103023	0.105119	0.118309	0.150359	0.10968	0.105982	0.0869981	0.151345	0.151592	0.118062	0.139511	0.135443
	4	0.0083254	-0.00475737	-0.000237869	-0.00951475	-0.0280685	0.00333016	0.0197431	0.0159372	-0.0123692	-0.00404377	0.0171265	0.0128449	0.0245005	0.02902	0.0254519	0.0233111	0.041627	0.0770695	0.0083254	0.0285442	0.00547098	0.0118934	-0.00428164	0.00285442	0.00475737	0.0166508	0.0418649	0.0447193	0.0794481	0.0680304	0.0409134	0.0461465	-0.00261656	-0.00951475	-0.000713606	0.0195052	-0.00999048	-0.00356803	-0.00142721	-0.0337774
	5	0.0116325	0.00742903	-0.00588192	-0.0177917	-0.00518135	-0.00891776	-0.00716631	0.00182442	0.00322557	0.0128001	0.0120995	0.0355689	0.0139677	0.0510983	0.0375538	0.0247099	0.0184047	-4.3786e-05	0.0240093	-0.0084507	-0.00950157	-0.0140553	-0.00588192	-0.033905	0.000890316	0.00018974	-0.00518135	0.0338174	0.0658104	0.0582208	0.0557688	0.108312	0.0879953	0.0700139	0.0840254	0.0630081	0.0496971	0.0492301	0.0363862	0.0403561
	6	0.00521163	-0.00804338	-0.0143094	0.0285886	0.0122006	-0.00177738	-0.00394638	-0.0340714	0.00979063	0.0206356	-0.0210574	0.0191896	0.0150926	0.0105136	0.0218406	-0.0147914	-0.00924838	-0.00225938	-0.00298238	0.000632625	-0.0343124	0.0276246	-0.0225034	-0.000451875	-0.0186474	0.0107546	0.00304263	0.0464227	0.0242506	0.0269016	0.0276246	0.0117186	-0.0133454	0.00207863	0.0235276	0.000632625	0.00882663	-0.000572375	0.00834463	-0.0128634
	7	0.00382031	0.00160125	-0.00646804	-0.00364379	0.00846015	0.0110827	0.00634196	0.00382031	-0.00747671	-0.0167564	-0.03814	0.00603936	0.00341684	0.00664456	-0.0480249	0.000996054	-0.00666978	0.00382031	-0.0127217	-0.00949403	-0.0288603	-0.0264395	-0.0321889	-0.0544803	-0.0397539	-0.0673912	-0.0143356	0.00704803	-0.0292638	-0.00324033	-0.00324033	-0.0482266	-0.0431833	-0.0449989	-0.0439903	-0.0324915	-0.0439903	-0.0397539	-0.0276499	-0.0270447
	8	-0.0111323	-0.0115937	0.0130934	-0.0106708	0.00640249	0.0493165	-0.00651785	-0.000519121	0.00778681	-0.018746	-0.00328777	0.00432601	0.0160927	-0.011363	-0.00559497	-0.00951722	-0.0305128	-0.0365115	-0.0365115	-0.028667	-0.0360501	-0.0388187	-0.0325893	-0.0253216	-0.0305128	-0.0265905	0.00547961	0.00709465	0.0543923	0.00686393	0.00790217	-0.001442	-0.0252062	-0.0291285	-0.0438946	-0.0337429	-0.0417027	-0.0462018	-0.0522005	-0.0389341
	9	0.0243254	0.0200692	0.012739	0.0300003	0.0065912	0.0115568	-0.0291136	-0.0198918	-0.0253303	-0.0127982	-0.00121183	-0.0380989	-0.0276949	0.0112021	0.00895575	-0.00925132	-0.0180002	-0.0281678	-0.0203647	-0.0220199	-0.0234387	-0.0201283	-0.0617444	-0.0107883	-0.00972423	-0.0135075	0.0375669	0.0548281	0.0853309	0.0607395	0.0486803	0.00399019	0.0134484	0.0172317	0.0197145	0.0195963	-0.000266012	0.00280791	0.0181775	0.0135666
	10	0.00399329	0.0161068	0.0170568	-0.0045574	-0.00574499	-0.0299719	-0.00907026	-0.0045574	0.0104063	0.00233066	0.0227573	0.0251325	0.0270326	0.0199071	0.0289328	0.0417588	0.0431839	0.0289328	0.037721	0.0365334	0.0431839	0.00423081	0.0343957	0.050072	0.0393836	0.0343957	0.0536348	0.0588602	0.105414	0.109689	0.126791	0.150543	0.137954	0.168594	0.184745	0.169069	0.165744	0.17952	0.131066	0.137717
	11	0.00246856	0.0123428	0.0302104	-0.0102269	0.0170448	-0.0182203	-0.0182203	-0.00905137	-0.00270366	-0.0130481	-0.0516046	0.0111673	-0.0182203	0.00411426	0.0149289	0.00905137	-0.0172799	0.0123428	-0.00434936	0.00717057	0.00152815	-0.00364406	-0.00540731	0.0182203	0.00952157	0.00775832	0.0189256	0.0116375	-0.00458446	0.0158693	0.00775832	0.0208064	0.0313859	0.0156342	0.0358528	0.0513695	0.0429058	0.0367932	0.00952157	0.0163395
	12	0.0215268	0.00780843	0.00486879	0.0014392	0.00952323	0.00731849	0.00731849	-0.0392259	-0.0245277	-3.06213e-05	0.0215268	0.0211593	0.0234865	0.0203019	0.0381848	0.0131978	-0.000275591	-0.0259975	0.0210368	-3.06213e-05	-0.000765532	0.027896	0.0345102	-0.0291821	-0.0617632	0.0310806	0.0396546	0.0237315	0.00535873	0.00731849	0.0127078	0.0185871	0.0418593	0.0425942	0.0301007	-0.00835962	0.0264262	0.0156475	0.019567	0.0227516
	13	0.0130644	-0.00249914	-0.000344193	-0.0408093	-0.00609072	-0.0115978	-0.0230909	0.0142616	0.0439519	0.007677	0.0468252	0.0305434	0.0386843	0.0171348	0.0350927	0.0425153	0.0611915	0.070769	0.0635859	-0.0120767	0.0216842	0.0578394	0.0683747	0.0619098	0.0525717	0.0781916	0.0803466	0.0868114	0.114826	0.107283	0.110276	0.0860931	0.0848959	0.0645436	0.0841776	0.0796283	0.0714874	0.0889664	0.100938	0.093396
	14	0.00968328	0.0011024	0.00896821	0.00777642	0.00992164	-0.0050949	0.00467777	-0.0189196	-0.0489527	0.00825314	0.00300927	0.0254149	0.0335191	0.0318506	0.0220779	0.00825314	0.022793	0.00157912	-0.00294968	0.0206477	-0.0251169	-0.0260704	-0.0264279	-0.0203498	0.00300927	-0.00867026	0.0635521	0.0630754	0.0163573	0.0320889	0.0232697	0.000148974	0.00896821	-0.00890862	-0.00747847	-0.0603939	-0.0375115	-0.0222567	-0.0189196	-0.0353663
	15	0.0304444	0.00171863	-0.0171863	-0.0360913	-0.0174319	-0.00957525	-0.00171863	-0.000491038	0.0233243	0.0166953	0.0301989	0.0495949	0.0451755	0.0451755	0.0363369	0.0297078	0.0164498	0.0211147	0.00712006	0.00466487	-0.00466487	-0.000736558	-0.0191505	-0.0301989	-0.0429659	-0.00417383	0.00466487	0.0626074	0.0591701	0.0370734	0.0478763	0.0223423	0.0117849	0.0154677	0.04493	0.0670268	0.0252885	0.0272526	0.0351093	0.0363369
	16	-0.0390506	-0.0279664	-0.0033885	0.00962335	-0.0180871	-0.0195328	-0.00724387	0.0101053	0.0491408	0.0520323	0.0751645	0.0380567	0.0717911	0.0554058	0.0580564	0.102152	0.0833572	0.130103	0.124561	0.149862	0.127935	0.168657	0.172392	0.179259	0.195645	0.135646	0.169139	0.154681	0.202873	0.181669	0.168657	0.206247	0.165525	0.183597	0.1442	0.13685	0.115646	0.12167	0.084321	0.0626346
	17	0.00752475	0.00313785	0.00630617	0.00849962	0.0119117	-0.0353694	-0.0161158	-0.00685453	0.00362529	0.00728104	0.0309216	0.027997	0.0976999	0.0816146	0.0794212	0.0318964	0.0630922	0.0450571	0.0669916	0.0153237	0.0275095	-0.0485301	-0.021965	-0.00100533	0.00849962	0.0226352	0.0587053	0.0357959	0.00996192	0.0501752	0.0645545	0.0221478	0.0721097	0.0665042	0.0604113	0.0874638	0.0884387	0.0704037	0.0323839	0.0484692
	18	-0.00265901	-0.0307772	0.00345365	-0.00534857	0.00100859	0.00785476	0.0122559	-0.00681561	-0.00779364	0.0107888	0.0469758	-0.00363703	0.00345365	0.00614322	0.00369816	-0.0342003	-0.0319998	-0.0302882	-0.0379902	-0.0483817	-0.023931	-0.0190409	-0.0368899	-0.0442251	-0.0361564	-0.00412604	0.0264372	0.0305938	0.0127449	0.0102998	0.0132339	-0.00485956	-0.0121947	-0.023442	-0.000213943	0.0269263	-0.00559308	-0.0117057	-0.000458449	-0.042269
	19	0.0118736	-0.0123146	-0.0372587	-0.0375106	0.0038109	0.00229914	0.00330698	-0.00475576	0.0355579	0.029007	0.0274952	0.0277472	0.0365658	0.047652	0.0499197	0.0471481	0.0234638	0.00179522	0.028755	0.028755	0.0176687	0.0186766	0.0179207	-0.0279361	-0.0249126	0.00935404	0.0461403	0.0617618	0.0617618	0.0882177	0.0979182	0.108123	0.0849422	0.0758716	0.117445	0.12576	0.0955245	0.142641	0.0622658	0.112154
	20	-0.00824069	-0.00800096	-0.00848042	-0.0190285	0.0135747	0.00686225	0.0176501	-0.0190285	-0.000809086	0.015013	0.0178898	0.00422523	0.0210063	0.0271194	-0.0113572	-0.0156723	-0.0075215	0.00782116	0.00422523	0.00158821	0.000869018	-0.0103983	-0.00632285	-0.0156723	0.0039855	0.00326631	0.0303557	0.0243625	0.00830062	-0.000329627	0.00158821	-0.0075215	0.00662252	0.0106979	0.00878008	-0.0286177	-0.0168709	-0.0240628	-0.0271793	-0.0235834
	21	0.0271524	-0.0148674	0.00987759	-0.00272837	-0.039379	-0.00879791	-0.010432	-0.00156116	0.0229504	0.0160638	0.00520871	0.0215498	0.0397584	0.00777659	0.0250514	0.0757087	0.00894381	0.0056756	0.0201491	0.033222	0.0553991	0.00380805	0.0383577	0.00777659	-0.0120661	-0.0017946	0.00100673	0.0138461	0.0262186	0.0413925	0.00474183	0.0626359	0.0504968	0.0257518	0.00544216	0.0229504	0.000773282	-0.0113658	-0.0101986	-0.0144006
	22	-0.0149129	0.00190082	-0.00477522	0.00585699	-0.00341529	0.00486795	-0.00032453	-0.0131821	0.0201981	0.0201981	0.0117912	0.00610425	0.0320666	0.029594	0.0268742	-0.00551701	0.0114204	0.0117912	0.0231652	-0.0218362	-0.00353892	-0.00700057	0.0171074	-0.000819051	0.0206926	0.0404735	0.0444297	0.0961072	0.103772	0.0916565	0.0846096	0.096849	0.119597	0.0948709	0.114157	0.113663	0.11391	0.146301	0.138883	0.108223
	23	0.0059212	0.0262579	0.0354342	-0.0213597	-0.0159035	0.0406423	-0.0206157	-0.0126794	-0.0129274	-0.00846328	0.000961032	0.0091453	0.00889729	0.0091453	0.00418514	0.00840128	0.0117494	0.00641721	0.0185696	0.00145705	-0.00821527	-0.00995133	-0.00995133	-0.00796726	-0.029792	0.0272499	0.00145705	0.0406423	0.0525467	0.0513067	0.03097	0.0341941	0.00170506	0.00840128	-0.00350312	-0.0188796	0.00988933	0.0188176	0.0168336	0.00344111
	24	-0.00910155	-0.0083522	-0.0163453	0.0151276	0.00913278	-0.017844	-0.0144719	-0.00160799	0.028616	0.0236203	0.0500976	0.0145032	0.0171259	0.00913278	-0.00310671	0.0176255	-0.0110998	-0.00685349	-0.00910155	-0.0108501	-0.0270861	-0.0203419	-0.0108501	-0.000608852	-0.0048552	0.00088986	0.0201233	0.00788385	0.0146281	0.0313637	0.0178753	0.0151276	0.0136289	0.0136289	0.0188744	0.0186246	0.0163766	0.0261182	0.00413707	0.0281165
[truncated: 15 more columns]

## Sheet: Figure5
	Figure 5b					Figure 5c																													Figure 4d/e				Figure 4f			Figure 4g				Figure 4h			Figure 4i
	Increase					Firing rate (spikes/s) of example cell 1 for Go stimulus when laser off																													DI of non-sig. neurons							DI of non-sig. neurons							DI of non-sig. neurons
	Unit #	Spikes/s (laser off)	Spikes/s (laser on)			Time from cue onset (ms) Trial #	-1000	-900	-800	-700	-600	-500	-400	-300	-200	-100	0	100	200	300	400	500	600	700	800	900	1000	1100	1200	1300	1400	1500			Unit #	Laser off	Laser on		# of decrease neurons	33		Unit #	Laser off	Laser on		# of decrease neurons	26		Unit #
	1	4.45	7			1	20	10	0	10	0	0	10	10	0	30	20	0	100	80	60	40	0	60	10	20	20	40	10	10	30	0			1	-0.201111	0.316667		# of increase neurons	86		1	-0.201111	0.316667		# of increase neurons	1		1
	2	8.51667	14.35			2	10	0	0	0	0	10	0	0	0	0	50	40	20	60	80	80	20	40	20	40	30	40	20	0	0	10			2	0.0166667	-0.197778		# of not sig neurons	39		2	0.0166667	-0.197778		# of not sig neurons	12		2
	3	15.6	26.2167			3	10	20	20	30	20	0	0	0	0	0	10	30	60	70	90	30	20	50	50	40	30	30	10	20	10	0			3	0.184444	0.21					3	0.184444	0.21					3
	4	0.7	1.18333			4	20	40	0	30	20	0	0	0	0	0	20	20	40	110	50	60	20	20	20	10	0	10	10	0	0	0			4	0.101111	0.0511111					4	0.101111	0.0511111					4
	5	3.31667	8.35			5	30	0	20	20	0	0	10	0	0	0	30	50	70	90	90	20	40	10	0	0	0	0	0	0	0	10			5	-0.0555556	-0.00777778					5	-0.0555556	-0.00777778					5
	6	2.15	3			6	30	50	30	60	10	10	0	0	40	30	20	70	20	60	50	20	60	0	20	30	30	40	0	0	0	0			6	0.0911111	0.215556					6	0.0911111	0.215556					6
	7	21.2833	30.2			7	0	10	20	0	0	0	0	30	10	30	10	10	120	80	40	60	40	20	20	40	0	20	0	10	20	10			7	-0.0244444	0.115556					7	-0.0244444	0.115556					7
	8	16.5667	28.6333			8	0	0	0	20	0	0	30	40	70	10	0	10	40	60	50	10	50	10	30	10	0	10	10	0	0	0			8	0.12	-0.0111111					8	0.12	-0.0111111					8
	9	1.33333	12.2167			9	20	0	0	0	0	0	0	0	0	20	30	50	70	40	80	20	60	20	20	50	20	0	10	10	10	10			9	0.224444	0.636667					9	0.224444	0.636667					9
	10	1.01667	1.71667			10	10	0	0	0	10	0	0	0	0	10	30	70	80	70	20	40	0	10	40	0	0	0	60	0	10	0			10	0.154444	0.104444					10	0.154444	0.104444
	11	2.5	4.81667			11	10	10	30	50	10	10	0	0	0	0	0	10	50	50	60	20	20	30	30	0	0	50	10	20	0	0			11	0.173333	0.0955556					11	0.241111	0.304444					DI of sig. neurons
	12	7.28333	9.8			12	10	10	10	0	20	20	0	10	10	30	10	20	40	80	30	30	20	30	10	20	20	0	0	20	0	10			12	0.0266667	-0.0377778					12	-0.11	0.322222					Unit #
	13	10.0833	16.45			13	0	0	10	10	0	0	10	0	10	40	20	20	60	60	70	20	60	30	40	0	30	0	0	20	10	0			13	0.241111	0.304444					13	0.08	0.195556					1
	14	4.35	6.05			14	10	60	20	0	10	40	10	0	0	0	10	50	70	50	20	40	40	20	10	10	0	0	0	0	0	10			14	0.0622222	0.161111					14	0.0466667	0.113333					2
	15	17.2167	24.6333			15	0	0	10	0	20	0	0	10	20	0	10	30	120	40	40	40	20	70	40	10	20	0	10	40	20	0			15	-0.11	0.322222					15	0.148889	0.0577778					3
	16	4.16667	7.63333			16	0	40	20	20	0	0	0	0	10	0	0	40	70	80	40	20	10	50	0	0	0	30	20	0	0	10			16	0.08	0.195556					16	0.0811111	-0.117778					4
	17	14.6667	23.8833			17	10	0	0	0	0	0	30	10	0	0	10	90	80	50	20	20	0	0	20	0	0	10	10	0	0	0			17	0.0466667	0.113333					17	0.233333	-0.0711111					5
	18	14.5167	23.4			18	0	20	0	0	0	0	0	10	10	10	20	50	60	80	100	40	50	0	10	20	20	0	10	0	0	0			18	-0.0344444	0.0855556					18	0.214444	0.205556					6
	19	2.46667	7.76667			19	10	20	30	0	10	30	0	50	0	20	30	60	150	120	70	40	80	70	60	40	50	30	20	10	0	10			19	-0.0222222	-0.0777778					19	0.0711111	-0.105556					7
	20	26.0833	32.4333			20	0	0	0	0	20	0	0	0	20	40	0	40	80	70	70	80	20	0	10	0	40	30	20	0	0	10			20	0.148889	0.0577778					20	0.0233333	0.0977778					8
	21	24	32.7333			21	20	60	50	20	50	30	20	0	0	0	20	60	90	150	40	20	30	30	40	10	10	0	0	0	0	10			21	0.0811111	-0.117778					21	0.0411111	0.177778					9
	22	20.7167	23.8			22	10	20	50	10	40	10	0	0	0	10	20	90	60	60	50	30	40	0	30	50	40	0	0	0	0	0			22	0.233333	-0.0711111					22	-0.0233333	-0.325556					10
	23	3.3	4.51667			23	0	0	20	0	0	40	30	20	70	10	20	30	120	100	20	20	0	100	40	30	10	0	0	10	0	0			23	0.132222	0.155556					23	-0.0277778	-0.398889					11
	24	2.31667	3.33333			24	0	30	40	40	40	60	80	30	50	0	10	90	40	90	70	40	50	30	20	30	30	30	0	0	40	0			24	0.214444	0.205556					24	0.19	-0.298889					12
	25	15.8333	19.2167			25	50	0	0	0	50	40	10	0	0	30	30	60	100	70	60	40	0	50	80	30	40	30	30	10	0	30			25	0.0711111	-0.105556					25	-0.0655556	-0.263333					13
	26	2.85	9.86667			26	0	0	0	40	60	40	30	0	0	10	30	20	30	70	30	70	10	10	10	10	0	50	20	0	0	0			26	0.0233333	0.0977778					26	0.181111	-0.222222					14
	27	7.98333	13.5			27	40	30	0	0	0	10	0	0	40	40	50	60	50	50	90	90	0	60	20	10	0	10	20	10	20	10			27	0.0411111	0.177778					27	-0.01	-0.184444					15
	28	17.15	23.1667			28	30	70	20	30	0	0	0	0	20	20	10	50	110	100	40	30	90	40	0	50	30	0	10	30	10	0			28	-0.0233333	-0.325556					28	0.0722222	0.0388889					16
	29	5.13333	11.45			29	40	10	30	10	20	40	10	0	0	40	20	10	120	110	50	40	40	20	0	10	10	0	10	0	0	10			29	-0.0277778	-0.398889					29	0.178889	-0.184444					17
	30	9.95	19.3			30	0	0	10	10	0	0	10	0	0	0	10	110	100	210	120	100	30	60	20	40	10	10	20	0	30	20			30	0.19	-0.298889					30	-0.214444	0.39					18
	31	14.85	25.8333																																31	-0.0655556	-0.263333					31	0.231111	0.215556					19
	32	18.45	33.6333			Firing rate (spikes/s) of example cell 1 for No-Go stimulus when laser off																													32	0.181111	-0.222222					32	0.114444	0.0555556					20
	33	33.0833	43.55			Time from cue onset (ms) Trial #	-1000	-900	-800	-700	-600	-500	-400	-300	-200	-100	0	100	200	300	400	500	600	700	800	900	1000	1100	1200	1300	1400	1500			33	-0.01	-0.184444					33	-0.223333	-0.415556					21
	34	27.9167	51.9			1	0	20	20	0	0	0	0	0	0	10	10	60	30	50	30	30	0	10	10	10	0	0	0	0	0	10			34	0.0722222	0.0388889					34	-0.205556	-0.173333					22
	35	25.2333	45.2667			2	0	0	0	0	0	0	30	20	70	20	10	40	50	30	10	10	0	20	0	0	10	0	0	0	0	10			35	0.178889	-0.184444					35	0.158889	0.0633333					23
	36	2.23333	3.98333			3	50	10	0	20	0	20	10	10	0	30	20	40	20	30	30	0	0	10	10	0	0	0	0	20	0	10			36	-0.214444	0.39					36	0.17	-0.01					24
	37	10.45	17.1333			4	0	0	10	30	10	50	20	10	10	40	50	30	10	10	30	10	0	20	0	0	0	0	0	0	0	10			37	0.231111	0.215556					37	0.144444	-0.333333					25
	38	10.3667	18.25			5	30	30	0	20	10	0	0	0	20	30	40	80	80	70	20	0	0	0	0	0	0	0	0	0	10	10			38	0.114444	0.0555556					38	0.108889	-0.0777778					26
	39	14.4667	20.55			6	60	30	40	40	20	10	0	0	20	0	20	40	40	40	40	10	20	10	0	10	0	0	0	0	0	0			39	-0.223333	-0.415556					39	-0.0366667	-0.0111111					27
	40	1.21667	2.18333			7	10	0	0	10	0	10	0	0	0	10	10	80	60	20	50	30	10	10	0	0	0	0	0	0	0	20			40	0.187778	0.291111					40	-0.131111	-0.202222					28
	41	16.8833	30.1333			8	20	0	0	0	0	0	0	70	40	10	60	20	70	60	20	0	0	0	0	0	0	0	10	0	10	20			41	-0.205556	-0.173333					41	0.0533333	-0.125556					29
	42	12	21.05			9	0	0	30	30	30	20	10	10	0	50	20	40	40	70	20	30	0	0	0	0	0	0	0	40	0	10			42	0.158889	0.0633333					42	0.18	0.248889					30
	43	18.6833	38.6833			10	10	50	10	40	60	30	10	0	20	20	20	60	90	50	40	20	30	10	0	0	10	0	10	0	10	20			43	0.17	-0.01					43	0.202222	-0.00222222
	44	5.23333	13.4833			11	10	10	0	20	10	50	0	0	0	0	10	20	10	70	40	30	0	0	10	0	10	0	0	20	10	10			44	0.144444	-0.333333					44	0.09	0.303333
	45	45.1333	52.7667			12	10	10	0	0	0	0	10	10	10	0	0	20	60	50	70	20	20	40	10	20	0	0	0	0	0	0			45	0.108889	-0.0777778					45	0.201111	-0.128889
	46	4.98333	7.66667			13	0	0	10	0	0	0	0	0	0	10	20	40	60	60	20	10	0	0	10	0	20	10	0	0	10	10			46	-0.0366667	-0.0111111					46	0.25	-0.508889
	47	3.1	4.25			14	0	0	0	0	10	0	0	0	0	20	30	30	30	10	10	0	0	0	0	0	0	0	0	0	0	0			47	-0.131111	-0.202222					47	0.188889	-0.03
	48	17.5	23.1167			15	0	0	0	0	0	0	50	0	10	10	60	80	90	90	10	20	0	0	0	10	10	30	30	20	20	40			48	0.0533333	-0.125556					48	0.0711111	-0.0533333
	49	6.16667	11.05			16	0	0	10	20	10	30	20	10	0	40	10	150	40	30	50	20	0	0	0	0	0	0	0	0	0	0			49	0.18	0.248889					49	0.23	0.324444
	50	7.2	12.7			17	0	0	0	10	10	0	60	30	30	30	40	80	50	20	0	10	10	40	10	0	0	0	20	0	0	20			50	0.202222	-0.00222222					50	0.145556	-0.207778
	51	9.08333	15.1333			18	10	0	0	10	10	50	60	10	70	40	60	60	40	40	20	0	0	20	80	10	30	0	60	10	10	0			51	0.09	0.303333					51	-0.198889	-0.0255556
	52	3.55	5.68333			19	10	0	0	10	0	20	20	60	30	40	20	40	60	40	90	30	20	0	0	0	0	0	0	0	0	20			52	0.201111	-0.128889					52	-0.227778	-0.285556
	53	2.48333	3.78333			20	0	10	0	0	0	0	0	0	0	0	10	40	10	50	50	10	0	0	0	40	10	0	0	0	0	0			53	0.25	-0.508889					53	0.175556	0.19
	54	0.466667	2.61667			21	10	10	0	0	10	20	0	10	40	0	20	40	20	50	20	60	20	0	0	0	0	0	0	20	0	0			54	0.188889	-0.03					54	-0.143333	0.324444
	55	3.98333	8.5			22	10	0	0	0	0	0	0	10	40	20	20	50	40	30	40	0	0	0	0	0	0	0	0	0	0	0			55	0.0711111	-0.0533333					55	0.11	0.391111
	56	7.96667	14.7833			23	40	0	0	0	0	10	20	20	0	30	20	20	30	50	20	30	10	0	0	10	0	0	0	0	10	0			56	0.23	0.324444					56	0.17	0.216667
	57	11.1667	14.4333			24	0	0	10	30	10	10	20	0	0	0	20	10	40	70	20	0	30	0	0	0	0	0	0	0	0	20			57	0.163333	0.935556
	58	8.33333	15.25			25	10	90	30	30	20	40	0	10	30	0	10	40	60	40	20	20	0	0	0	0	0	0	0	0	0	10			58	0.145556	-0.207778					DI of sig. neurons
	59	12.0667	17.0333			26	0	0	0	40	10	10	10	20	0	0	20	50	20	50	50	30	80	50	30	20	10	0	0	0	0	10			59	-0.198889	-0.0255556					Unit #	Laser off	Laser on
	60	1.46667	2.51667			27	0	10	10	10	30	50	10	0	20	10	20	40	50	60	20	0	10	10	0	0	10	40	0	0	0	10			60	-0.227778	-0.285556					1	0.524444	0.437778
	61	2.68333	4.01667			28	10	60	40	0	0	0	0	20	40	60	90	50	70	80	10	20	20	10	0	0	0	0	0	0	0	20			61	-0.171111	0.0588889					2	0.494444	0.613333
	62	3.68333	6.01667			29	10	0	0	0	10	30	0	0	0	0	10	40	50	50	50	30	0	0	0	0	0	0	0	10	0	0			62	0.175556	0.19					3	0.378889	0.405556
	63	4.01667	7.38333			30	20	10	20	50	20	10	70	0	0	0	10	90	60	40	40	10	0	0	0	10	30	0	0	0	0	20			63	-0.143333	0.324444					4	0.278889	0.424444
	64	19.8333	29.9																																64	0.11	0.391111					5	0.783333	0.881111
	65	29.0333	36.15			Firing rate (spikes/s) of example cell 1 for Go stimulus when laser on																													65	0.17	0.216667					6	0.842222	0.937778
	66	24.05	41.2			Time from cue onset (ms) Trial #	-1000	-900	-800	-700	-600	-500	-400	-300	-200	-100	0	100	200	300	400	500	600	700	800	900	1000	1100	1200	1300	1400	1500										7	0.342222	0.0866667
	67	16.45	25.25			1	0	0	0	0	0	0	0	0	0	0	10	20	30	40	10	0	10	0	0	20	0	0	0	0	0	0			DI of sig. neurons							8	0.543333	0.668889
	68	5.08333	7.28333			2	0	0	0	0	0	0	0	0	0	0	20	10	40	50	0	0	10	0	0	0	0	0	0	20	0	0			Unit #	Laser off	Laser on					9	0.79	0.425556
	69	13.2333	20.4333			3	0	0	0	0	0	0	0	0	10	0	10	50	60	0	10	0	0	0	10	0	0	0	0	0	10	10			1	0.524444	0.437778					10	0.272222	0.223333
	70	6.28333	9.53333			4	0	10	0	0	0	0	0	0	0	10	40	10	40	40	10	10	0	40	0	10	10	0	0	0	0	0			2	0.494444	0.613333					11	0.361111	0.0844444
	71	3.1	11.55			5	0	10	0	0	0	0	0	0	0	0	20	20	10	10	10	0	10	0	0	0	0	0	0	0	0	0			3	0.905556	0.475556					12	0.386667	-0.0366667
	72	4.33333	6.21667			6	0	0	0	0	0	0	0	0	0	0	30	30	50	10	30	0	0	30	50	0	0	0	20	0	0	0			4	0.334444	0.0233333					13	0.352222	0.178889
	73	10.1	20.6167			7	0	0	0	0	0	0	10	40	0	0	20	30	30	40	30	10	10	10	40	0	0	0	0	0	0	20			5	0.738889	0.615556					14	0.793333	0.884444
	74	19.0167	35.5			8	0	0	0	0	0	0	0	0	0	0	0	20	30	50	10	10	0	0	10	0	0	0	0	0	10	0			6	0.378889	0.405556					15	0.911111	0.891111
	75	9.75	19.3833			9	10	0	0	0	0	0	0	0	0	0	0	20	40	40	20	10	20	0	40	10	0	0	10	0	0	0			7	0.278889	0.424444					16	0.35	0.562222
	76	20.4	43.2			10	0	0	10	0	0	0	0	0	0	0	0	10	40	10	10	30	0	10	0	0	0	0	0	0	0	0			8	0.783333	0.881111					17	0.792222	0.746667
	77	9.98333	13.3667			11	0	0	0	0	10	0	0	10	0	0	0	70	10	20	10	0	0	0	0	0	0	0	10	0	0	0			9	0.842222	0.937778					18	0.595556	0.845556
	78	9.43333	16.8833			12	0	20	0	0	10	0	0	0	0	0	0	70	80	30	0	10	0	20	10	0	0	0	0	0	0	10			10	0.342222	0.0866667					19	0.524444	0.525556
	79	8.23333	13.7			13	0	0	0	0	0	0	0	0	10	20	20	70	70	20	10	10	0	0	20	0	0	0	0	0	10	20			11	0.543333	0.668889					20	1	1
	80	13	19.3667			14	10	0	0	0	0	0	0	0	10	30	30	10	30	50	70	10	0	0	10	0	0	0	0	0	10	0			12	0.79	0.425556					21	0.478889	0.495556
	81	1.16667	4.21667			15	0	0	0	0	0	0	0	0	0	20	10	40	40	30	20	20	10	10	20	0	10	0	0	0	10	0			13	0.272222	0.223333					22	0.38	0.0733333
	82	0.983333	1.91667			16	0	0	0	0	0	20	0	0	0	10	0	0	30	10	50	10	10	0	0	20	0	0	0	10	0	0			14	0.361111	0.0844444					23	0.657778	0.676667
	83	0.816667	2.1			17	50	0	0	0	0	0	0	0	0	0	10	10	20	50	10	10	0	20	30	20	0	0	0	0	10	0			15	0.6	0.642222					24	0.274444	0.297778
	84	17.1833	21.3			18	0	10	30	0	30	10	10	0	10	20	20	10	10	50	30	10	10	0	0	20	0	10	0	0	0	0			16	0.386667	-0.0366667					25	0.724444	0.581111
	85	8.66667	11.9			19	0	20	0	0	0	0	0	0	40	0	20	50	70	40	40	30	0	20	20	10	50	0	10	0	0	0			17	0.58	0.686667					26	0.693333	0.252222
	86	4.66667	6.71667			20	0	0	30	10	20	10	0	0	10	0	0	50	70	20	10	0	0	0	0	0	10	30	0	0	0	0			18	0.352222	0.178889					27	0.251111	0.32
	87	16.4833	24.7			21	0	0	20	0	0	0	10	0	20	20	10	30	100	30	40	30	40	0	0	20	10	0	0	0	0	0			19	0.445556	0.417778					28	0.413333	0.258889
						22	0	10	0	0	0	0	0	10	0	0	10	50	100	110	40	40	40	20	0	20	0	0	20	0	10	0			20	0.793333	0.884444					29	0.268889	0.04
	Decrease					23	0	0	0	0	0	0	0	0	0	0	10	30	70	50	30	50	40	0	20	30	0	0	10	0	0	10			21	0.911111	0.891111					30	0.432222	0.416667
	Unit #	Spikes/s (laser off)	Spikes/s (laser on)			24	0	10	0	0	0	10	10	0	0	0	0	10	80	30	0	0	0	0	10	10	20	20	0	0	0	0			22	0.35	0.562222					31	0.308889	-0.238889
	1	3.51667	1.95			25	10	0	0	0	0	0	10	0	0	0	0	30	90	120	40	40	20	30	10	0	10	0	20	0	0	20			23	0.792222	0.746667					32	0.762222	0.0933333
	2	5.75	3.06667			26	40	60	0	0	0	0	0	30	40	20	10	140	70	60	30	30	0	20	10	0	0	10	0	0	0	0			24	0.595556	0.845556					33	0.448889	0.0122222
	3	8.5	5.63333			27	10	30	0	30	10	0	0	0	0	0	0	110	90	80	20	0	20	50	0	0	10	20	0	10	0	0			25	0.524444	0.525556					34	0.536667	0.426667
	4	11.8833	4			28	0	0	0	0	0	0	0	0	10	0	20	0	30	60	10	30	0	10	0	0	0	0	0	0	0	0			26	0.434444	0.415556					35	0.357778	-0.24
	5	14.9167	10.8333			29	0	0	0	10	0	0	0	0	0	0	20	40	60	50	40	10	60	0	20	30	40	10	0	0	10	0			27	1	1					36	0.457778	0.0211111
	6	16.0667	10.2			30	0	10	10	10	10	0	0	0	0	0	0	50	110	30	20	30	0	0	20	10	0	0	0	0	0	0			28	0.478889	0.495556					37	0.363333	-0.00444444
	7	6	2.1																																29	0.38	0.0733333					38	0.337778	0.231111
	8	22.0667	19.0333			Firing rate (spikes/s) of example cell 1 for No-Go stimulus when laser on																													30	0.657778	0.676667					39	0.493333	0.332222
	9	9.01667	4.11667			Time from cue onset (ms) Trial #	-1000	-900	-800	-700	-600	-500	-400	-300	-200	-100	0	100	200	300	400	500	600	700	800	900	1000	1100	1200	1300	1400	1500			31	0.274444	0.297778					40	0.465556	0.676667
	10	1.45	0.616667			1	20	10	0	0	0	0	20	0	0	0	10	30	30	0	10	0	10	0	20	10	0	0	0	0	0	10			32	0.724444	0.581111					41	0.725556	0.597778
	11	4.81667	1.76667			2	0	0	0	10	0	0	0	0	0	0	0	10	30	0	10	20	10	0	0	0	0	0	0	0	0	0			33	0.693333	0.252222					42	0.745556	0.383333
	12	3.31667	1.66667			3	0	0	0	0	0	0	0	0	0	10	0	0	60	60	20	0	0	0	0	0	0	10	0	0	20	10			34	0.251111	0.32					43	0.632222	0.74
	13	35.4667	29.3333			4	0	0	0	0	0	0	0	0	0	10	10	10	70	30	50	0	0	0	0	10	0	0	0	20	0	0			35	0.413333	0.258889					44	0.304444	0.0666667
	14	6.23333	2.15			5	20	0	0	0	0	0	0	0	0	10	10	20	50	60	30	20	30	0	0	0	10	0	0	0	0	0			36	0.268889	0.04					45	0.337778	0.342222
	15	3.8	1.08333			6	20	20	20	0	10	0	0	0	0	10	10	10	10	30	10	0	10	0	0	0	0	0	0	0	0	10			37	0.432222	0.416667					46	0.853333	0.643333
	16	14.3	10.0167			7	10	10	10	0	20	0	10	0	0	0	0	0	20	40	20	0	0	0	0	0	0	0	0	0	0	20			38	0.308889	-0.238889					47	0.666667	0.514444
	17	3.88333	1.5			8	10	20	0	0	0	0	0	0	0	0	20	40	0	30	30	0	0	0	0	10	0	0	0	0	10	0			39	0.762222	0.0933333					48	0.598889	-0.301111
	18	4.51667	2.78333			9	0	0	10	0	10	20	0	0	0	0	10	10	30	40	20	10	10	0	0	10	0	0	0	0	0	0			40	0.448889	0.0122222					49	0.936667	0.885556
	19	6.86667	3.45			10	0	30	0	0	0	0	0	0	0	0	0	10	30	20	0	0	0	0	0	0	0	0	10	0	0	0			41	0.536667	0.426667					50	0.346667	-0.09
	20	11.4667	6.61667			11	20	0	0	10	0	0	0	0	0	0	10	30	20	30	70	10	0	10	0	0	0	0	10	0	10	10			42	0.795556	0.576667					51	0.943333	0.673333
	21	3.41667	2.61667			12	0	0	0	0	0	0	0	0	0	0	0	40	0	20	20	20	20	0	10	0	0	0	0	0	10	0			43	0.357778	-0.24					52	0.768889	0.156667
	22	2.7	1.55			13	0	0	10	10	0	0	10	0	20	0	0	0	10	10	0	0	0	0	0	0	0	0	0	0	0	0			44	0.457778	0.0211111					53	0.983333	0.892222
	23	0.8	0.216667			14	10	20	10	0	0	0	0	10	10	0	0	0	30	10	30	10	10	0	0	0	0	0	30	0	0	0			45	0.363333	-0.00444444					54	0.506667	0.521111
	24	6.76667	4.68333			15	0	0	0	0	0	0	10	10	0	10	10	50	0	0	0	0	0	0	0	0	10	0	0	0	0	0			46	0.337778	0.231111					55	0.815556	0.784444
	25	7.5	5.88333			16	0	10	0	0	0	30	50	30	10	0	20	10	0	30	10	0	0	0	0	20	0	0	0	0	0	0			47	0.493333	0.332222					56	0.463333	0.434444
	26	6.25	2.31667			17	10	20	10	0	0	10	0	0	0	0	10	20	40	30	10	10	10	0	0	0	0	0	0	20	0	0			48	0.465556	0.676667					57	0.597778	0.0377778
	27	11.5167	8.53333			18	0	0	0	10	0	0	0	0	0	0	0	20	30	20	0	10	0	0	0	20	0	10	10	0	0	0			49	0.53	0.21					58	0.486667	0.392222
	28	8	4.23333			19	10	0	10	0	0	0	0	10	20	10	20	10	20	10	10	10	0	0	0	0	0	10	10	0	0	0			50	0.725556	0.597778					59	0.785556	0.81
	29	12.1333	6.63333			20	0	0	0	0	0	0	0	0	0	10	20	20	10	0	0	0	0	0	0	0	10	20	0	0	0	0			51	0.745556	0.383333					60	0.774444	0.651111
	30	3.01667	2.35			21	0	0	0	10	0	0	0	0	0	0	0	10	0	0	0	0	0	0	0	10	0	20	30	0	20	20			52	0.632222	0.74					61	0.958889	1
	31	19.6667	11.55			22	0	0	10	10	20	0	0	0	0	0	0	20	20	20	0	0	0	0	0	0	20	0	20	0	0	0			53	0.304444	0.0666667					62	0.906667	0.991111
	32	15.2333	11.7333			23	0	0	0	0	0	0	10	0	10	0	20	40	10	40	10	10	0	0	0	0	10	0	0	10	0	0			54	0.337778	0.342222					63	0.548889	0.682222
	33	4.55	0.766667			24	50	0	10	0	0	0	0	0	0	0	0	20	50	90	10	40	10	10	50	30	30	20	10	10	0	0			55	0.321111	-0.272222					64	0.257778	0.361111
	34	8.61667	0.383333			25	50	40	20	0	10	10	0	20	30	0	0	10	20	10	0	10	0	0	10	0	0	0	0	10	0	0			56	0.853333	0.643333					65	0.435556	0.106667
	35	8.66667	4.93333			26	60	0	0	0	10	0	0	0	0	0	0	40	60	40	70	30	10	10	0	0	0	0	0	0	0	0			57	0.872222	0.46					66	0.383333	0.254444
	36	17.15	12.25			27	0	0	0	0	20	20	0	0	0	0	0	40	0	40	10	10	10	0	10	0	10	0	10	0	0	0			58	0.666667	0.514444					67	0.54	0.411111
	37	13.35	3.85			28	0	30	0	0	0	0	0	0	0	0	0	30	30	60	20	20	40	0	0	0	0	0	20	0	0	0			59	0.598889	-0.301111					68	0.65	0.846667
	38	19.1667	12.05			29	10	0	0	0	0	0	0	0	40	20	40	90	50	50	10	0	0	0	0	0	10	0	0	0	0	0			60	0.936667	0.885556					69	0.742222	0.856667
	39	52.75	45.9			30	0	0	0	0	0	0	0	0	0	0	20	10	0	10	40	10	10	0	0	0	0	0	0	10	0	20			61	0.488889	0.35					70	0.608889	-0.0822222
	40	2.15	0.316667																																62	0.754444	0.0877778					71	0.883333	0.928889
	41	26.25	5.25			Firing rate (spikes/s) of example cell 2 for Go stimulus when laser off																													63	0.346667	-0.09					72	0.7	0.32
	42	28.75	15.8167			Time from cue onset (ms) Trial #	-1000	-900	-800	-700	-600	-500	-400	-300	-200	-100	0	100	200	300	400	500	600	700	800	900	1000	1100	1200	1300	1400	1500			64	0.943333	0.673333					73	0.66	0.546667
	43	11.0333	2.85			1	40	0	20	40	40	20	30	40	50	40	20	20	40	30	30	30	50	20	30	30	40	50	20	10	0	30			65	0.625556	0.273333					74	0.777778	0.956667
	44	14.7	1.93333			2	10	20	30	10	10	0	20	10	10	30	10	30	20	20	50	0	10	20	10	20	10	20	20	30	30	30			66	0.768889	0.156667					75	0.947778	0.997778
	45	13.4333	5.51667			3	10	20	0	20	10	0	10	20	10	20	20	30	30	20	10	20	0	20	10	10	50	10	40	40	30	40			67	0.644444	0.238889					76	0.955556	1
	46	5.03333	1.43333			4	10	10	10	30	30	10	20	10	0	10	10	30	30	20	20	20	0	0	0	0	0	20	40	20	40	60			68	0.476667	0.152222					77	0.935556	0.841111
	47	23.7667	13.9			5	20	20	10	20	10	20	10	0	10	10	10	50	30	20	50	20	10	30	40	30	30	30	40	30	30	20			69	0.516667	0.172222					78	0.68	0.886667
	48	20.4	2.06667			6	0	0	0	10	10	0	0	20	30	10	40	40	0	40	20	0	0	10	0	0	0	0	0	0	0	10			70	0.983333	0.892222					79	0.617778	0.561111
	49	9.7	1.45			7	20	10	30	0	20	0	0	40	30	50	40	20	10	50	10	0	0	10	0	0	0	10	10	10	20	30			71	0.506667	0.521111					80	0.814444	0.816667
	50	6.8	1.91667			8	30	20	10	10	20	20	10	20	10	20	30	40	40	20	40	20	10	0	0	0	30	30	10	30	30	40			72	0.815556	0.784444					81	0.731111	0.921111
	51	22.5333	4.5			9	10	10	0	0	10	0	20	10	0	0	10	20	40	20	0	50	30	20	30	20	40	20	30	0	20	40			73	0.463333	0.434444					82	0.733333	0.892222
	52	26.1167	2.85			10	20	30	0	20	20	0	10	10	10	20	10	10	30	40	30	20	20	0	10	0	0	20	40	30	20	20			74	0.847778	0.788889					83	-0.493333	-0.252222
	53	25.0333	15.9167			11	20	20	0	0	20	30	40	20	30	0	0	30	40	30	40	10	30	20	30	40	20	10	20	30	50	20			75	0.597778	0.0377778					84	-0.474444	-0.237778
	54	5.55	1.83333			12	10	20	10	0	20	10	10	10	10	0	10	30	30	10	10	10	30	10	20	0	20	10	30	30	30	30			76	0.842222	0.606667					85	-0.303333	-0.187778
	55	27.5667	7.11667			13	60	0	10	20	30	20	20	20	50	10	80	40	40	20	90	20	30	20	30	0	10	50	20	20	20	10			77	0.816667	0.887778					86	-0.377778	-0.0577778
	56	49.2333	7.7			14	10	0	10	20	0	10	20	10	30	0	30	30	40	40	50	20	50	10	20	0	20	10	40	40	0	30			78	0.486667	0.392222					87	-0.231111	-0.164444
	57	10.0667	6.45			15	40	10	20	10	30	0	20	0	0	0	30	30	40	40	40	50	10	20	20	10	20	20	30	50	30	10			79	0.785556	0.81					88	-0.295556	-0.553333
	58	19.4333	8.93333			16	10	20	10	0	10	10	0	10	10	10	20	30	20	10	0	20	0	0	0	40	20	10	30	30	30	0			80	0.288889	0.742222					89	-0.621111	-0.954444
	59	16.85	7.48333			17	0	10	10	0	20	0	10	0	0	0	10	20	20	30	20	30	10	30	10	20	30	40	20	50	30	30			81	0.774444	0.651111					90	-0.434444	-0.771111
						18	10	30	10	10	0	0	20	20	10	20	10	60	30	30	10	20	0	0	10	20	20	10	20	30	10	10			82	0.958889	1					91	-0.435556	-0.335556
	Not significant					19	10	10	0	10	20	0	20	20	0	30	10	20	20	30	10	10	10	10	10	10	20	20	20	10	20	40			83	0.637778	0.933333					92	-0.301111	-0.227778
	Unit #	Spikes/s (laser off)	Spikes/s (laser on)			20	10	20	20	0	10	20	10	10	20	0	0	0	10	20	0	10	30	20	0	10	0	20	40	50	30	30			84	0.906667	0.991111					93	-0.41	-0.558889
	1	5.93333	5.13333			21	0	0	10	0	0	10	20	0	0	10	20	30	40	20	40	0	20	20	30	10	40	30	10	10	0	0			85	0.548889	0.682222					94	-0.455556	-0.547778
	2	5.15	5.98333			22	10	20	0	0	0	10	0	0	0	20	30	40	30	50	30	10	10	10	20	20	30	20	40	30	10	10			86	0.257778	0.361111					95	-0.415556	-0.187778
	3	7.8	6.4			23	20	10	0	10	10	10	20	20	20	0	30	20	50	30	20	10	10	10	10	10	10	20	30	20	40	10			87	0.435556	0.106667					96	-0.26	0.0411111
	4	10.7833	10.4			24	20	10	0	10	0	0	0	0	0	0	10	30	20	30	30	0	10	20	30	30	20	30	20	30	20	30			88	0.383333	0.254444					97	-0.595556	-0.422222
	5	10.15	9.83333			25	30	20	30	20	30	0	10	0	10	0	10	30	30	30	30	0	10	0	10	10	50	20	10	20	0	40			89	0.54	0.411111					98	-0.377778	-0.185556
	6	9.5	9.05			26	0	0	20	10	0	10	10	30	10	20	10	40	0	0	30	0	10	10	10	30	0	20	10	10	30	0			90	0.428889	0.377778					99	-0.521111	0.0433333
	7	14.7667	13.7667			27	10	0	0	0	0	0	0	0	0	0	30	40	10	30	10	10	10	10	20	10	10	20	10	20	10	30			91	0.65	0.846667					100	-0.366667	0.101111
	8	13.8167	18.2167			28	0	0	10	0	0	10	0	0	10	10	10	20	20	10	20	10	10	0	10	10	30	30	30	10	30	30			92	0.742222	0.856667					101	-0.362222	-0.212222
	9	6.55	5.85			29	10	0	10	0	40	0	10	0	0	0	20	40	30	60	20	20	10	0	10	0	10	0	20	10	20	20			93	0.608889	-0.0822222					102	-0.593333	-0.205556
	10	1.06667	1.58333			30	10	0	20	20	20	10	20	10	10	10	0	20	20	30	20	0	10	0	10	10	10	20	10	10	20	10			94	0.992222	0.0155556
	11	35.45	35.7667																																95	0.883333	0.928889
	12	6.25	5.55			Firing rate (spikes/s) of example cell 2 for No-Go stimulus when laser off																													96	0.7	0.32
	13	1.65	1.53333			Time from cue onset (ms) Trial #	-1000	-900	-800	-700	-600	-500	-400	-300	-200	-100	0	100	200	300	400	500	600	700	800	900	1000	1100	1200	1300	1400	1500			97	0.66	0.546667
	14	5.88333	3.93333			1	20	10	40	0	10	10	10	0	20	20	20	30	20	10	30	10	10	10	0	10	0	10	10	20	10	20			98	0.777778	0.956667
	15	2.11667	2.2			2	10	10	10	0	10	10	70	20	10	20	20	30	20	50	10	10	20	0	20	10	10	10	0	20	0	10			99	0.947778	0.997778
	16	25.9	27.8833			3	10	10	20	0	10	10	0	20	10	20	30	40	10	10	20	10	10	0	20	10	10	10	10	0	10	10			100	0.955556	1
	17	12.2833	12.4			4	10	30	30	10	20	30	0	10	0	10	10	30	10	20	30	10	10	10	10	0	0	10	0	10	10	20			101	0.935556	0.841111
	18	4.08333	4.01667			5	20	0	10	20	10	10	0	10	0	0	10	20	20	10	20	20	10	10	20	0	10	20	10	30	10	10			102	0.481111	-0.113333
	19	4.31667	3.65			6	30	10	10	20	0	30	20	10	20	10	20	30	20	10	20	10	10	0	20	10	10	10	20	10	0	20			103	0.324444	-0.0144444
	20	29.1	31.4167			7	0	0	0	0	0	0	0	0	0	0	10	40	30	10	10	10	10	0	0	0	0	10	0	0	0	0			104	0.68	0.886667
	21	6.66667	7.01667			8	10	10	0	10	0	10	0	30	10	0	10	20	10	30	20	20	10	0	0	0	20	0	20	10	0	20			105	0.617778	0.561111
	22	3.83333	3.71667			9	10	20	20	10	30	0	0	10	10	20	10	30	10	10	10	20	10	20	0	10	10	0	10	10	10	20			106	0.814444	0.816667
	23	5.68333	5.01667			10	0	20	30	10	10	0	0	0	20	0	10	30	20	20	20	0	10	10	10	10	10	20	30	10	30	10			107	0.731111	0.921111
	24	4.8	3.85			11	30	30	10	10	0	10	20	10	10	10	20	30	20	20	30	10	10	0	10	10	20	20	10	20	10	30			108	0.817778	0.606667
	25	2.66667	3.26667			12	10	10	30	0	10	10	0	10	10	20	10	30	20	20	10	10	0	10	20	0	10	0	0	0	20	10			109	0.671111	0.698889
	26	7.61667	6.63333			13	10	10	10	20	0	20	20	20	50	0	10	30	20	30	30	20	0	10	10	10	10	10	20	0	10	0			110	0.645556	0.697778
	27	1.03333	1.1			14	20	10	0	10	0	20	10	10	10	0	10	40	10	20	20	10	0	10	20	10	10	0	10	0	10	10			111	0.733333	0.892222
	28	7.66667	7.18333			15	0	30	30	20	10	10	10	0	0	0	10	30	20	0	20	10	20	0	10	10	10	10	20	10	10	10			112	-0.493333	-0.252222
	29	21.6667	20.25			16	0	10	10	0	30	10	10	10	0	0	10	20	10	20	30	20	10	0	10	0	10	0	10	0	0	10			113	-0.474444	-0.237778
	30	44.6	43.4167			17	0	10	10	10	0	10	0	0	10	0	10	40	10	20	20	0	10	0	10	0	0	10	10	0	10	20			114	-0.303333	-0.187778
	31	1.56667	2.4			18	0	0	10	0	10	10	0	10	30	20	20	50	30	30	10	20	20	20	20	10	20	10	10	20	0	10			115	-0.377778	-0.0577778
	32	1.4	1.4			19	10	20	0	30	30	10	10	10	20	20	10	20	30	40	10	10	20	0	0	10	10	10	20	10	20	0			116	-0.231111	-0.164444
	33	2.78333	3.45			20	0	20	10	20	0	20	0	0	20	20	20	20	20	20	20	0	10	0	10	20	20	10	10	0	10	10			117	-0.295556	-0.553333
	34	30.9	32			21	0	10	10	10	20	10	0	10	10	0	20	40	20	20	30	10	0	0	0	0	10	10	0	0	10	20			118	-0.621111	-0.954444
	35	0.883333	1.01667			22	10	30	10	20	20	10	10	0	10	10	10	40	30	10	10	20	0	10	0	0	0	0	10	0	0	10			119	-0.434444	-0.771111
	36	2.55	2.16667			23	10	0	0	0	10	0	0	10	10	20	0	40	20	30	10	10	0	10	10	10	10	10	20	0	10	0			120	-0.435556	-0.335556
	37	1.66667	1.23333			24	10	10	20	10	20	10	0	30	0	10	20	10	20	20	10	0	10	0	0	0	10	0	0	0	0	10			121	-0.301111	-0.227778
	38	6.25	5.83333			25	0	0	0	0	20	20	10	20	20	20	20	40	30	20	20	0	10	10	10	10	10	10	0	0	10	10			122	-0.41	-0.558889
	39	3.13333	4.08333			26	10	30	30	10	10	10	0	0	20	30	20	30	20	40	20	30	10	50	40	10	10	20	20	10	10	0			123	-0.455556	-0.547778
	40	6.5	5.33333			27	0	0	10	10	10	10	10	0	10	0	10	40	30	30	10	10	0	0	0	0	0	0	10	20	10	20			124	-0.415556	-0.187778
	41	7.71667	6.31667			28	20	10	0	10	20	0	30	0	0	20	20	10	0	20	0	20	10	10	0	0	0	0	10	0	0	0			125	-0.26	0.0411111
	42	1.65	1.88333			29	10	10	10	0	20	20	30	0	0	0	10	20	30	20	10	0	0	0	10	10	10	10	10	20	10	10			126	-0.595556	-0.422222
	43	15.9667	15.5333			30	10	10	0	20	10	10	0	10	10	10	10	20	20	10	10	10	10	0	0	0	10	10	10	10	0	20			127	-0.377778	-0.185556
	44	1.68333	0.85																																128	-0.521111	0.0433333
	45	3.31667	2.75			Firing rate (spikes/s) of example cell 2 for Go stimulus when laser on																													129	-0.3	0.0922222
	46	50.3833	49.7833			Time from cue onset (ms) Trial #	-1000	-900	-800	-700	-600	-500	-400	-300	-200	-100	0	100	200	300	400	500	600	700	800	900	1000	1100	1200	1300	1400	1500			130	-0.366667	0.101111
	47	31.7333	27.9667			1	10	20	10	20	0	40	10	20	20	20	20	60	40	30	40	40	0	10	20	20	30	20	70	20	70	40			131	-0.362222	-0.212222
	48	16.6667	13.1			2	0	0	30	40	40	10	30	20	10	60	40	60	40	30	30	40	10	0	0	10	20	40	30	70	50	20			132	-0.593333	-0.205556
	49	6.1	6.1			3	20	20	20	30	30	40	30	20	10	20	30	60	50	30	50	10	10	20	30	40	80	40	10	40	50	30
	50	1.9	1.58333			4	0	20	20	40	30	40	40	20	10	0	10	40	30	20	30	60	30	30	10	50	40	30	10	40	20	40
	51	4.36667	3.65			5	10	10	10	20	10	0	10	0	0	10	30	50	50	50	50	40	20	10	20	10	70	20	50	70	40	60
						6	20	10	0	0	0	10	0	10	0	20	40	50	40	40	40	40	20	20	20	10	70	40	20	40	10	40
						7	30	10	20	20	0	0	20	10	20	20	60	30	30	30	50	40	30	60	20	50	20	30	40	10	30	20
						8	10	30	20	10	30	0	20	0	20	10	10	70	50	40	50	10	30	10	20	10	10	30	30	50	20	20
						9	20	10	20	10	40	30	30	10	0	40	0	40	20	30	40	20	10	10	20	20	40	40	40	20	20	20
						10	0	20	0	20	20	10	10	20	20	30	10	70	50	20	40	10	40	10	10	40	40	30	50	30	30	30
						11	10	20	10	0	0	0	10	10	30	20	20	50	30	40	40	50	20	60	60	60	30	40	50	50	40	20
						12	20	10	10	30	0	30	20	30	0	20	20	60	50	30	20	10	50	30	10	20	10	30	70	10	20	40
						13	10	10	0	30	20	0	40	20	20	20	50	70	40	30	30	40	20	20	10	20	10	20	30	40	40	30
						14	10	10	20	20	30	20	30	0	0	0	20	70	10	30	40	20	10	20	10	40	20	20	40	40	40	50
						15	0	0	20	0	10	20	20	20	0	10	0	60	10	20	30	50	20	40	30	20	10	0	20	30	40	40
						16	0	20	20	10	10	10	20	20	10	10	40	30	50	20	30	10	10	40	10	20	40	10	50	10	50	10
						17	10	0	20	0	10	10	30	20	30	10	10	30	20	20	50	20	20	40	20	30	10	40	20	20	30	10
						18	50	0	10	0	0	0	0	10	0	20	30	20	10	0	20	40	20	20	20	10	30	20	10	20	0	30
						19	0	10	20	30	0	20	0	30	20	10	10	30	40	10	0	10	10	20	20	20	30	50	10	10	20	10
						20	0	0	10	0	0	10	0	0	0	20	20	20	40	40	30	20	20	30	20	20	40	20	10	10	0	10
						21	20	0	0	0	0	10	0	10	20	10	0	20	20	30	10	10	40	20	20	50	0	20	20	30	30	20
						22	20	10	20	30	30	20	0	0	0	0	10	20	30	20	20	10	30	10	20	20	20	10	20	10	20	30
						23	20	10	0	10	0	0	10	10	20	10	20	20	50	20	30	10	20	10	10	60	20	0	20	10	30	10
						24	0	0	0	0	0	0	0	20	0	0	0	60	30	30	20	30	20	30	20	20	30	10	20	30	30	50
						25	10	10	0	0	0	0	10	10	0	10	20	20	30	20	20	10	30	60	40	10	50	0	10	20	20	20
						26	0	0	0	0	0	0	0	10	0	20	10	40	50	0	10	20	10	0	10	20	10	30	20	30	0	30
						27	0	10	20	10	0	0	0	0	0	0	0	10	30	20	20	10	0	10	0	0	0	30	10	10	40	0
						28	0	30	20	10	0	10	0	0	20	0	30	50	20	30	40	20	20	50	0	20	0	10	10	10	20	20
						29	10	10	40	10	10	0	10	10	0	0	0	40	10	30	10	10	30	0	10	20	10	40	0	30	10	30
						30	20	20	40	0	20	0	0	0	10	0	20	40	30	40	0	30	10	30	20	10	10	30	40	0	10	20
						Firing rate (spikes/s) of example cell 2 for No-Go stimulus when laser on
						Time from cue onset (ms) Trial #	-1000	-900	-800	-700	-600	-500	-400	-300	-200	-100	0	100	200	300	400	500	600	700	800	900	1000	1100	1200	1300	1400	1500
						1	10	30	40	20	10	30	30	60	30	20	50	60	50	10	30	30	20	20	40	20	20	20	20	10	40	30
						2	10	10	20	40	40	30	10	20	20	30	40	60	40	30	20	20	20	10	0	20	10	0	20	0	20	20
						3	10	10	20	10	10	0	0	0	0	0	10	70	20	30	40	20	0	20	20	10	20	0	20	20	20	20
						4	10	30	20	30	10	0	0	0	30	20	60	40	50	20	20	20	10	20	30	30	30	40	20	10	0	10
						5	0	10	10	30	20	20	10	10	10	0	20	60	60	30	30	50	20	10	10	50	0	50	0	20	20	0
						6	20	30	20	20	10	30	20	30	30	90	60	30	20	30	30	40	10	20	10	0	20	20	10	20	20	10
						7	20	10	10	40	40	20	0	10	0	0	10	50	20	40	20	20	30	20	50	10	10	10	10	20	10	20
						8	20	40	30	20	30	20	30	10	30	20	40	40	50	40	40	20	60	50	50	10	20	20	20	20	20	20
						9	10	20	20	20	20	10	10	10	10	10	30	50	50	20	40	20	10	0	10	10	10	20	20	20	20	0
						10	30	70	40	30	20	20	10	0	10	60	30	70	0	40	20	10	20	30	20	20	10	20	10	20	20	20
						11	20	20	30	30	20	30	30	20	10	0	30	30	40	50	10	30	40	10	10	10	20	30	10	20	30	30
						12	0	20	20	10	0	0	0	10	0	30	30	60	40	30	40	10	10	10	30	30	0	10	20	10	20	10
						13	20	20	10	10	20	20	10	10	30	20	20	50	50	20	40	40	20	20	10	10	20	20	10	10	10	10
						14	20	0	0	10	40	10	20	30	10	0	10	40	50	20	30	30	10	20	10	10	30	30	20	10	10	30
						15	20	10	20	10	10	10	10	20	20	30	20	20	30	20	50	30	20	10	20	10	20	10	10	10	10	10
						16	10	20	20	10	10	20	0	30	40	30	10	20	20	20	20	20	20	20	0	20	20	50	40	30	20	0
						17	0	10	10	20	0	10	20	20	10	10	10	50	30	20	10	20	20	20	0	20	20	40	10	40	40	0
						18	30	0	10	10	0	20	0	10	20	10	10	30	20	10	30	20	30	30	0	0	0	10	20	10	0	20
						19	20	10	20	20	0	10	10	0	0	40	0	30	40	40	40	20	30	20	20	20	20	10	20	10	30	30
						20	10	10	0	20	20	20	0	0	10	10	20	10	40	40	10	20	10	0	20	0	30	20	30	30	10	10
						21	0	10	0	0	20	20	20	20	10	20	20	20	40	40	40	0	10	20	0	20	10	20	20	20	20	40
						22	10	10	10	0	10	10	0	0	20	20	20	50	10	20	20	10	10	0	20	20	10	10	20	30	20	20
						23	0	0	0	0	0	0	0	10	0	10	10	40	10	50	20	20	30	20	30	10	50	20	20	40	10	10
						24	20	0	0	10	10	0	10	0	0	10	20	10	0	0	20	0	0	10	10	0	0	30	10	0	0	20
						25	10	10	0	10	10	0	0	0	20	0	30	30	10	20	20	20	0	0	10	30	10	30	10	0	10	30
						26	10	0	0	10	0	10	10	10	0	0	10	20	20	20	10	0	10	30	0	0	0	0	10	20	0	20
						27	20	10	20	10	0	0	20	0	0	0	20	40	10	20	20	10	0	10	0	0	0	0	10	10	20	0
						28	0	0	10	20	10	0	0	10	10	0	0	10	40	10	0	10	10	0	0	10	0	10	10	10	10	20
						29	20	0	0	0	0	0	10	10	10	10	0	50	10	20	10	30	20	0	0	0	0	10	10	20	20	0
						30	10	20	10	30	10	20	20	20	10	0	0	10	10	10	20	10	20	10	10	10	0	0	20	20	20	50
[truncated: 28 more columns]

## Sheet: Figure 6
	Figure 6c				Figure 6d					Figure 6e					Figure 6f				Figure 6i				Figure 6j					Figure 6k
	EPSC				EPSC					IPSC					Latency (ms) of EPSC & IPSC				EPSC				EPSC					Latency (ms) of EPSC & IPSC
	Cell #	Latency (ms)	Amplitude (pA)		Cell #	ACSF	+TTX	+TTX & 4-AP		Cell #	ACSF	+TTX	+TTX & 4-AP		Cell #	EPSC	IPSC		Cell #	Latency (ms)	Amplitude (pA)		Cell #	ACSF	+TTX	+TTX & 4-AP		Cell #	EPSC	IPSC
	1	5.35	-83.2264		1	-270.89	-2.13	-158.68		1	429.999	5.383	11.8544		1	6.55	10.65		1	5	-101.293		1	-219.41	-4.6	-54.15		1	5	9.4
	2	5.2	-571.44		2	-25.04	-10.36	-220.14		2	36.7727	2.4221	6.123		2	5.4	8.8		2	4.1	-219.414		2	-67.45	-2.02	-27.68		2	4.75	7.9
	3	7.95	-314.539		3	-460.72	-2	-328.73		3	674.773	3.4808	1.8912		3	6.9	9.4		3	4.4	-447.912		3	-363.15	-4.06	-327.04		3	6.9	11.35
	4	7.6	-464.672		4	-81.45	-2.31	-90.33		4	1300	7.3358	2.7234		4	6	6.75		4	4.15	-264.779							4	3.95	9.2
	5	6.55	-68.9415												5	5.9	7.3		5	4.95	-68.7035
	6	7.3	-23.4689																6	5.3	-27.5631
	7	5.4	-270.887																7	4.3	-354.153
	8	4.25	-141.297																8	5.8	-88.2952
	9	6.9	-25.0393																9	7	-32.0743
	10	7.35	-20.1565																10	5.5	-244.352
	11	8.2	-45.6762																11	4.5	-531.894
	12	6	-460.715																12	5.75	-281.49
	13	5.9	-81.4957																13	4.75	-25.5335
																			14	6.9	-18.8774
																			15	8.4	-13.9925
																			16	4.9	-971.29
																			17	3.95	-242.584
																			18	6.25	-22.8761
																			19	5.95	-220.636

## Sheet: Figure 7
	Figure 7b				Figure 7c																												Figure 7d				Figure 7e								Figure 7f
		Broad-spiking	Narrow-spiking		Firing rate (spikes/s) of example cell for Go stimulus when laser off																												DI of non-sig. neurons				Laser off								Laser on
	# of decrease neurons	7	4		Time from cue onset (ms) Trial #	-1000	-900	-800	-700	-600	-500	-400	-300	-200	-100	0	100	200	300	400	500	600	700	800	900	1000	1100	1200	1300	1400	1500		Unit #	Laser off	Laser on		Learning phases	β of pref cue	Linefit of pref cue	β of nonpref cue	Linefit of nonpref cue	Cue SI	Linefit of cue SI		Learning phases	β of pref cue	Linefit of pref cue	β of nonpref cue	Linefit of nonpref cue
	# of increase neurons	30	2		1	0	10	0	0	0	0	0	20	10	20	0	20	10	10	0	10	0	20	0	0	0	10	20	20	0	10		1	-0.235556	-0.187778		Early	0.4786	0.5241	0.6184	0.6464	-0.2315	-0.2024		Early	0.5196	0.5213	0.6105	0.6286
	# of not sig neurons	15	1		2	0	10	10	0	0	0	10	0	0	0	20	10	20	10	10	0	0	10	0	10	30	20	10	10	30	10		2	-0.237778	-0.243333		Middle	0.8003	0.7092	0.5551	0.4991	0.4058	0.3477		Middle	0.6871	0.6837	0.6406	0.6044
					3	0	0	30	0	0	10	0	0	0	0	0	0	10	10	0	10	0	0	10	0	20	0	20	0	40	10		3	-0.147778	-0.336667		Late	0.8488	0.8943	0.3239	0.3518	0.8689	0.8979		Late	0.8442	0.846	0.5621	0.5802
					4	0	0	0	0	0	10	10	0	10	0	20	0	10	0	0	0	10	0	0	10	0	10	10	10	30	20		4	0.0522222	-0.114444
					5	10	0	0	0	10	0	10	10	0	0	10	10	0	10	0	10	10	0	0	10	0	20	10	10	20	10		5	-0.233333	-0.102222
					6	0	10	10	20	0	20	20	0	20	20	0	0	40	0	0	0	0	0	10	20	10	20	20	10	30	0		6	-0.108889	-0.246667
					7	0	20	0	0	0	10	0	0	0	0	0	10	10	0	0	0	0	0	20	10	0	0	30	40	10	20		7	-0.147778	-0.217778
					8	0	0	10	10	10	0	0	0	0	0	0	0	0	10	0	0	0	0	10	0	10	20	0	20	10	20		8	0.0633333	-0.0744444
					9	0	0	0	0	0	20	0	10	10	0	10	20	10	10	0	0	0	0	20	20	20	10	20	30	10	10		9	-0.0566667	-0.376667
					10	0	40	0	0	0	10	10	0	0	0	20	0	10	0	10	10	0	10	10	10	0	10	10	20	20	10		10	-0.122222	-0.262222
					11	10	0	0	10	0	10	0	0	0	0	10	10	10	0	10	0	10	0	0	0	0	0	10	30	20	10		11	0.146667	0.303333
					12	0	0	0	0	0	0	20	20	10	20	10	0	10	0	10	0	10	0	0	20	20	10	0	10	10	30		12	-0.0344444	0.194444
					13	20	10	0	0	0	0	0	0	0	0	0	10	10	20	10	10	20	10	10	10	10	10	0	30	0	40		13	0.133333	-0.0888889
					14	10	0	10	0	10	0	0	0	0	10	0	20	0	0	0	10	0	10	0	20	0	10	10	20	0	10		14	0.0422222	-0.232222
					15	0	10	0	0	10	0	0	0	0	0	0	0	0	0	0	0	0	0	0	10	0	0	0	20	0	10		15	0.0611111	0.374444
					16	0	0	10	0	0	0	0	0	0	0	10	0	10	0	0	0	0	0	0	10	10	10	0	10	30	0		16	-0.0966667	-0.355556
					17	0	0	10	0	0	0	0	0	0	0	0	10	0	0	0	10	0	0	10	10	0	0	10	20	0	10		17	0.185556	0.461111
					18	0	0	0	20	20	10	0	0	0	10	0	0	20	0	10	0	0	0	0	10	10	0	0	10	0	20		18	-0.103333	-0.113333
					19	10	0	0	0	10	0	0	0	0	0	10	10	10	10	0	10	10	10	0	10	30	10	10	0	30	10		19	0.187778	0.235556
					20	0	20	0	0	20	10	0	0	10	0	0	0	0	0	0	0	10	0	0	10	10	20	0	0	20	10		20	-0.0533333	0.31
					21	0	0	0	0	0	0	0	0	0	10	0	0	10	10	20	0	0	0	0	10	10	10	0	20	10	20		21	0.153333	-0.0766667
					22	0	0	0	0	0	0	10	20	0	0	10	10	10	20	0	0	0	10	0	0	10	10	10	10	20	20		22	0.136667	0.186667
					23	10	20	0	10	0	0	10	0	0	0	0	10	20	10	10	0	10	0	0	0	0	10	30	10	30	30		23	0.21	0.506667
					24	0	10	0	10	0	0	10	0	10	0	10	0	10	0	0	0	0	20	20	10	0	20	30	20	20	40		24	0.0677778	0.198889
					25	0	0	0	20	10	0	0	10	20	0	10	10	10	0	0	10	0	0	10	10	0	20	0	10	40	10		25	-0.157778	0.384444
					26	0	10	0	0	0	0	0	10	0	0	0	10	0	0	0	0	0	10	0	0	0	0	10	10	10	10		26	-0.125556	0.384444
					27	10	0	20	0	0	0	0	0	0	0	0	0	10	0	0	10	0	0	10	0	10	10	0	10	20	10		27	-0.117778	0.421111
					28	0	0	10	0	10	0	0	10	10	0	0	0	10	0	10	0	0	10	0	10	10	0	10	10	10	10		28	0.0866667	0.484444
					29	0	0	0	30	10	30	10	10	10	0	0	10	0	10	0	0	10	10	0	10	10	0	0	0	0	0		29	0.0877778	0.242222
					30	0	0	0	0	0	0	30	0	10	0	0	0	10	0	0	0	10	0	20	0	0	10	0	0	10	10
					Firing rate (spikes/s) of example cell for No-Go stimulus when laser off																												DI of sig. neurons
					Time from cue onset (ms) Trial #	-1000	-900	-800	-700	-600	-500	-400	-300	-200	-100	0	100	200	300	400	500	600	700	800	900	1000	1100	1200	1300	1400	1500		Unit #	Laser off	Laser on
					1	10	0	30	0	0	0	0	0	0	10	0	10	10	10	0	10	0	10	10	20	0	0	0	0	0	10		1	0.911111	0.763333
					2	10	0	0	10	0	0	10	30	10	0	20	10	30	0	0	0	0	0	0	0	0	10	0	0	20	0		2	0.315556	0.38
					3	0	0	10	0	10	10	10	20	10	0	20	10	10	0	10	0	0	10	0	10	0	0	0	10	10	0		3	0.747778	0.237778
					4	0	0	10	10	10	10	0	0	10	0	10	10	0	0	20	0	0	0	0	0	0	10	0	0	10	10		4	0.57	0.453333
					5	0	0	0	10	0	0	0	20	0	0	20	10	10	10	0	0	0	0	0	0	10	0	0	0	10	0		5	0.242222	-0.351111
					6	0	0	0	0	0	10	0	0	10	10	0	10	0	0	0	0	0	0	0	0	0	0	0	0	0	10		6	0.521111	-0.237778
					7	10	0	20	10	0	10	20	0	10	0	10	10	10	0	10	0	0	0	0	0	0	10	0	0	10	10		7	0.266667	-0.381111
					8	0	20	0	0	0	20	0	0	0	0	0	0	0	0	0	0	0	0	0	0	10	0	0	20	0	0		8	0.868889	0.561111
					9	10	10	10	0	10	0	0	0	0	0	10	10	10	0	10	0	10	0	0	0	0	10	10	10	0	20		9	0.58	0.125556
					10	0	0	0	0	0	10	0	10	10	20	0	0	10	10	0	10	0	0	10	0	0	0	0	0	0	0		10	0.725556	0.644444
					11	10	0	0	20	0	0	10	0	0	0	0	10	10	10	10	0	0	10	0	0	0	10	0	0	0	10		11	0.358889	0.422222
					12	0	0	0	0	0	0	0	10	20	10	0	0	0	0	0	0	0	0	0	10	10	10	0	10	0	10		12	0.505556	0.22
					13	0	0	20	30	10	10	20	0	0	0	20	10	0	20	0	10	0	10	0	0	0	0	0	0	0	0		13	0.736667	0.531111
					14	0	10	0	0	0	10	0	0	0	0	10	10	10	10	0	0	0	0	0	0	0	0	0	0	10	0		14	0.46	0.52
					15	10	0	0	10	0	0	0	0	10	0	0	0	10	0	0	0	0	0	0	0	10	0	10	0	0	0		15	0.598889	0.351111
					16	20	0	0	0	0	0	10	0	10	10	10	0	10	0	0	0	10	10	0	0	0	0	0	0	0	0		16	0.283333	0.131111
					17	0	0	10	0	0	0	0	0	0	0	10	0	10	0	0	0	0	0	0	0	0	0	0	0	0	0		17	-0.352222	-0.277778
					18	0	0	10	0	0	0	0	0	0	0	0	0	10	0	0	0	0	0	0	0	0	0	0	0	0	0		18	-0.538889	-0.68
					19	20	20	0	0	0	0	10	0	0	10	0	0	0	0	0	0	0	0	0	0	0	0	10	0	0	0		19	-0.373333	-0.243333
					20	10	0	10	0	0	0	0	0	0	20	0	10	0	10	0	0	0	0	0	0	0	0	0	0	0	10		20	-0.361111	-0.201111
					21	10	0	0	0	0	0	0	0	0	0	10	0	10	0	0	0	0	0	0	0	0	0	0	0	0	0		21	-0.5	0.125556
					22	0	0	0	0	0	0	0	0	10	10	0	0	0	0	0	0	0	0	0	10	0	0	0	0	0	0		22	-0.504444	-0.0355556
					23	0	10	10	10	0	0	10	0	0	0	0	0	20	10	0	10	0	0	10	10	10	0	0	0	0	0		23	-0.262222	0.146667
					24	20	0	20	20	0	10	10	10	20	0	0	10	20	10	0	0	0	0	0	0	0	0	0	0	0	0
					25	0	0	0	0	0	0	0	0	0	0	10	10	0	10	0	0	0	0	0	0	0	0	0	0	0	10
					26	0	0	0	20	0	0	0	0	10	0	0	0	0	0	10	0	0	0	0	20	0	0	10	0	0	0
					27	10	10	0	0	0	0	20	0	30	10	10	0	10	10	0	0	0	10	0	0	0	30	10	0	0	0
					28	10	0	0	20	0	10	10	10	20	0	0	0	20	0	0	0	0	10	0	10	0	20	20	10	10	0
					29	0	10	0	0	0	10	0	0	20	0	0	10	0	0	10	10	0	10	0	0	0	0	0	0	0	0
					30	0	10	0	0	10	0	0	0	0	0	0	10	0	10	0	0	0	0	0	0	0	0	0	0	0	0
					Firing rate (spikes/s) of example cell for Go stimulus when laser on
					Time from cue onset (ms) Trial #	-1000	-900	-800	-700	-600	-500	-400	-300	-200	-100	0	100	200	300	400	500	600	700	800	900	1000	1100	1200	1300	1400	1500
					1	10	0	10	10	10	0	10	10	20	10	10	0	10	10	0	10	0	10	20	0	0	10	20	20	0	10
					2	10	0	0	30	10	0	10	10	0	20	20	10	20	0	10	0	0	0	10	10	10	30	20	0	20	40
					3	0	10	10	10	0	0	10	10	0	10	20	10	0	20	0	0	10	0	0	10	10	30	10	30	10	30
					4	10	0	10	20	10	0	10	0	10	0	0	0	10	0	10	40	10	0	20	10	10	0	30	20	20	0
					5	0	0	20	0	0	10	10	0	30	0	0	0	40	30	10	0	20	0	0	10	10	20	10	30	20	10
					6	30	10	10	30	0	30	10	10	0	0	20	0	20	0	0	0	10	10	0	0	20	0	10	0	20	30
					7	10	10	20	10	0	50	0	0	10	10	10	0	20	10	10	0	20	30	20	10	10	10	10	20	40	40
					8	20	0	10	0	30	0	20	0	20	0	20	0	10	10	0	10	30	30	0	10	30	0	0	20	20	10
					9	10	10	20	10	10	40	0	10	30	10	10	20	30	10	0	0	0	10	0	20	30	10	10	0	20	10
					10	0	0	10	10	20	10	10	0	10	10	20	0	10	30	0	0	30	10	10	10	20	10	10	0	10	20
					11	10	0	10	30	10	20	0	20	0	20	20	0	0	40	10	20	10	30	0	0	10	20	20	20	50	10
					12	20	10	20	0	0	10	0	0	0	0	20	20	10	0	0	20	20	0	10	10	10	20	20	10	10	20
					13	20	10	50	0	0	20	20	0	0	10	10	20	10	10	10	0	10	10	30	30	0	10	20	30	40	10
					14	30	10	0	0	0	0	20	40	0	0	10	0	20	0	10	0	10	20	10	20	0	20	0	30	20	30
					15	20	20	0	20	10	10	0	10	20	30	10	0	10	0	10	20	10	0	0	0	10	40	20	10	40	0
					16	20	10	0	0	0	0	10	0	0	20	10	30	20	0	30	10	20	30	40	20	10	10	10	10	20	10
					17	0	10	30	0	0	30	10	10	40	0	10	10	40	30	10	0	20	0	10	0	30	0	10	10	10	30
					18	20	20	10	0	0	0	20	0	0	50	0	10	20	10	20	10	10	10	0	10	30	10	0	40	10	10
					19	20	0	10	0	0	10	0	0	20	0	0	30	30	0	40	10	0	10	10	50	20	0	10	0	30	20
					20	10	10	20	0	10	10	10	20	20	0	0	30	40	10	40	0	10	20	10	40	0	0	0	20	30	0
					21	20	0	20	0	10	0	20	0	0	40	10	0	30	40	20	0	20	10	20	20	10	0	30	10	40	10
					22	10	10	30	20	0	0	20	0	0	10	20	10	20	10	10	0	0	10	30	0	20	20	10	50	0	30
					23	0	10	0	20	0	10	20	20	0	0	10	0	20	40	30	50	20	10	0	20	20	10	10	0	10	30
					24	70	0	60	0	0	0	0	30	10	30	20	0	60	20	10	0	10	10	20	30	40	0	0	0	30	20
					25	40	0	0	40	0	0	0	0	0	10	10	10	0	10	20	10	20	30	0	30	0	30	0	10	10	30
					26	0	0	30	0	50	20	60	0	10	30	0	20	10	10	10	0	30	10	0	20	0	10	10	10	0	10
					27	10	10	30	0	0	0	30	0	10	0	0	30	10	10	0	10	20	0	10	10	10	30	10	0	0	10
					28	20	20	0	20	0	10	0	0	0	20	40	30	10	10	10	10	10	20	20	20	10	10	0	20	20	40
					29	10	10	0	0	0	0	0	30	10	20	0	20	10	20	0	0	0	40	10	0	10	10	10	20	0	10
					30	30	0	10	0	0	0	30	0	10	10	10	40	20	20	50	20	10	20	10	0	10	10	0	0	0	0
					Firing rate (spikes/s) of example cell for No-Go stimulus when laser on
					Time from cue onset (ms) Trial #	-1000	-900	-800	-700	-600	-500	-400	-300	-200	-100	0	100	200	300	400	500	600	700	800	900	1000	1100	1200	1300	1400	1500
					1	10	0	20	10	0	0	10	10	0	10	20	0	20	0	20	0	10	0	0	0	0	10	0	10	0	20
					2	30	30	0	20	0	10	30	0	10	10	0	0	10	0	0	10	0	0	10	20	0	0	10	0	10	0
					3	10	0	0	10	10	10	0	0	20	20	20	10	10	10	0	0	0	40	0	0	0	20	10	0	0	0
					4	30	20	10	10	0	30	20	0	0	20	20	30	0	20	10	0	10	30	20	0	10	0	0	20	0	0
					5	10	20	10	0	20	30	0	20	20	0	0	40	0	10	0	10	20	0	10	0	0	0	0	0	0	0
					6	0	20	30	10	30	0	30	50	20	20	20	20	0	10	0	10	0	0	0	10	10	30	0	30	30	0
					7	0	20	20	0	20	10	20	0	0	30	0	0	10	10	0	0	0	10	30	0	0	10	0	0	0	0
					8	0	20	0	20	20	10	10	0	0	10	10	10	50	0	0	0	0	10	0	10	10	10	10	0	0	0
					9	20	30	0	0	10	10	0	0	0	40	20	0	10	20	30	10	0	30	10	0	0	20	0	0	30	0
					10	20	0	0	40	40	30	20	10	20	30	0	10	0	10	0	0	0	0	0	20	0	0	0	10	10	0
					11	10	10	30	0	40	10	10	10	0	10	30	20	10	30	20	0	0	10	0	0	0	0	0	10	0	10
					12	10	10	0	40	0	0	10	10	10	10	10	20	20	30	20	0	0	0	10	10	10	0	20	20	0	10
					13	0	10	0	40	0	20	40	10	0	0	30	10	0	30	10	30	10	0	0	10	10	0	10	40	0	0
					14	0	40	0	0	40	0	0	30	0	0	30	10	10	0	0	10	0	0	20	20	0	30	0	20	0	10
					15	0	0	40	10	30	30	0	40	40	0	30	20	0	20	10	10	10	0	40	0	0	10	0	0	10	0
					16	10	10	0	20	20	0	30	0	0	20	10	0	20	0	10	10	0	10	10	0	0	50	10	30	10	0
					17	10	10	10	10	0	0	10	0	0	0	0	0	40	0	0	10	20	10	10	0	0	0	10	10	0	0
					18	20	10	0	0	0	30	10	10	20	0	20	0	20	10	0	0	10	10	10	0	0	0	0	30	10	0
					19	50	10	30	30	0	10	10	0	0	70	40	40	10	0	0	10	20	40	0	30	0	20	10	20	0	0
					20	30	30	0	20	0	0	10	50	0	30	10	10	20	10	20	10	20	0	0	0	10	0	10	30	0	10
					21	30	40	20	10	0	0	30	40	20	10	20	10	40	10	0	10	0	0	0	30	0	0	10	10	0	20
					22	10	0	10	10	0	0	20	0	40	10	10	10	0	0	0	0	0	20	10	0	10	30	0	0	10	10
					23	20	0	0	0	50	10	0	20	10	0	10	0	0	0	0	0	0	20	10	10	0	10	10	20	10	0
					24	40	0	10	0	0	10	30	0	0	40	30	0	0	10	10	0	0	30	0	10	10	10	0	20	0	0
					25	0	20	10	30	0	0	70	10	0	0	30	60	30	10	20	40	0	0	10	0	10	20	0	20	0	30
					26	20	0	0	0	10	0	30	0	0	40	0	0	0	20	40	10	0	0	0	10	10	20	0	0	0	10
					27	40	0	0	0	40	0	30	0	10	20	10	0	0	30	50	0	0	20	10	10	10	20	0	0	0	30
					28	20	10	0	10	10	0	10	0	0	40	0	40	10	40	0	0	10	30	0	40	10	0	30	0	0	0
					29	30	10	0	0	10	0	0	0	0	0	30	0	30	30	0	0	0	10	0	0	0	30	0	0	30	10
					30	10	50	0	0	10	10	0	0	0	0	10	0	0	10	0	0	10	0	0	0	0	10	10	0	10	10
[truncated: 25 more columns]

## Sheet: Supplement 2
	Sup 2a													Sup 2b
	Discriminability (eOPN)													Discriminability (eOPN)
	Mouse # Block #	1	2	3	4	5	6	7	8	9	10			Mouse # Block #	1	2	3	4	5	6	7	8	9	10
	1	0.616055	0.90445	0.0974028	0.684761	0.316542	-0.173858	1.5694	-0.684761	-0.684761	-0.488466			1	0.544913	1.04817	0.312182	1.24446	0.988633	0.477731	0.415954	1.47903	0.258041	1.47903
	2	1.28155	1.39151	0	0.803232	0.757151	0.43993	1.0282	0.757151	-0.506694	1.39151			2	0.43993	1.64485	1.64485	0.803232	1.39151	0	-1.12045	2.16925	1.12045	2.16925
	3	1.39151	0.317221	0	1.64485	1.39151	0	1.64485	0.803232	-0.363302	1.12045			3	0.363302	1.12045	3.28971	1.12045	2.48647	0	1.5349	1.39151	2.48647	2.92641
	4	1.64485	1.8982	-0.524401	2.16925	1.8982	1.12045	1.5349	1.80595	0	0			4	1.36602	1.28155	3.28971	1.8982	1.8982	0.757151	3.28971	1.39151	2.48647	2.92641
	5	0.803232	0.588274	0.803232	1.64485	1.64485	1.39151	2.48647	0.43993	0	0.363302			5	1.28155	1.64485	3.28971	1.64485	1.64485	2.16925	2.5631	1.39151	2.48647	3.28971
	6	1.64485	1.0282	0.757151	2.92641	1.80595	1.12045	1.8982	1.12045	0.363302	0.363302			6	1.39151	2.48647	2.92641	1.39151	1.39151	2.16925	3.28971	2.92641	2.92641	2.48647
	7	2.16925	1.64485	0.803232	2.92641	2.48647	1.8982	1.64485	1.39151	0.803232	0.803232			7	0.757151	1.8982	2.16925	1.64485	1.64485	1.8982	3.28971	2.16925	2.92641	3.28971
	8	2.16925	1.8982	0.363302	3.28971	2.92641	2.92641	1.39151	1.64485	1.64485	0.363302			8	1.68324	2.16925	2.92641	2.48647	1.64485	2.16925	2.48647	1.8982	2.92641	3.28971
	9	1.8982	1.5349	0.803232	2.5631	2.48647	2.48647	2.16925	1.8982	1.39151	0			9	1.0282	2.48647	3.28971	2.16925	2.16925	2.92641	2.92641	2.48647	2.92641	2.48647
	10	2.16925	2.16925	1.64485	2.48647	2.48647	3.28971	3.28971	1.12045	1.8982	0.363302			10	1.64485	2.16925	2.92641	2.92641	2.16925	2.48647	3.28971	2.48647	3.28971	2.92641
	11	1.8982	1.8982	1.64485	2.92641	2.92641	2.92641	2.92641	2.48647	2.16925	0.363302			11	1.39151	2.92641	3.28971	1.8982	1.8982	2.48647	3.28971	1.8982	2.92641	3.28971
	12	2.86549	2.87477	1.33987	2.86549	2.87477	3.23807	2.86549	1.78456	2.40956	0.311667			12	1.71228	2.86549	2.86549	2.43484	2.40956	2.87477	2.87477	2.43484	2.40956	2.86549
	Discriminability (eGFP)													Discriminability (eGFP)
	Mouse # Block #	1	2	3	4	5	6	7	8	9	10	11		Mouse # Block #	1	2	3	4	5	6	7	8	9	10
	1	0.650524	-0.0974028	-0.114537	-0.0974028	-0.0974028	-0.0974028	0.988633	-0.143748	0.312182	0.258041	-0.0974028		1	0.744296	0.988633	1.94197	0.258041	0.988633	1.47903	0.488466	0.988633	0.988633	0.258041
	2	1.12045	0.803232	0.317221	0.803232	1.12045	1.12045	0.803232	0.363302	1.64485	1.28155	0		2	2.48647	2.48647	2.92641	2.48647	1.8982	3.28971	1.12045	2.48647	1.64485	2.16925
	3	1.64485	1.39151	0.43993	2.16925	3.28971	1.64485	0.803232	1.12045	1.12045	2.16925	0.363302		3	3.28971	3.28971	2.48647	3.28971	2.92641	3.28971	2.92641	2.16925	2.48647	3.28971
	4	2.16925	1.8982	1.12045	2.92641	2.48647	2.92641	2.48647	2.16925	1.39151	1.8982	1.39151		4	2.92641	3.28971	2.92641	2.92641	2.92641	3.28971	2.92641	2.48647	2.48647	2.16925
	5	2.48647	2.48647	1.12045	2.48647	3.28971	2.92641	2.92641	2.48647	1.8982	3.28971	2.16925		5	3.28971	2.92641	3.28971	3.28971	3.28971	3.28971	3.28971	2.48647	2.48647	2.92641
	6	2.92641	2.48647	2.16925	3.28971	2.92641	3.28971	2.92641	1.64485	2.16925	2.92641	1.12045		6	3.28971	2.92641	3.28971	3.28971	3.28971	3.28971	3.28971	2.48647	1.8982	3.28971
	7	3.28971	2.48647	2.48647	2.92641	2.92641	3.28971	2.92641	2.92641	2.92641	3.28971	3.28971		7	3.28971	3.28971	3.28971	3.28971	2.92641	2.48647	2.48647	2.48647	2.92641	3.28971
	8	2.92641	2.48647	2.16925	3.28971	3.28971	3.28971	3.28971	2.92641	3.28971	3.28971	2.16925		8	3.28971	3.28971	3.28971	2.92641	3.28971	3.28971	2.48647	2.48647	2.92641	2.48647
	9	2.92641	2.92641	2.16925	2.92641	2.92641	2.92641	2.92641	2.48647	3.28971	3.28971	2.48647		9	3.28971	3.28971	3.28971	3.28971	3.28971	3.28971	3.28971	2.92641	2.48647	3.28971
	10	3.28971	3.28971	3.28971	3.28971	1.36602	2.5631	3.28971	2.92641	3.28971	3.28971	3.28971		10	3.28971	3.28971	3.28971	3.28971	3.28971	3.28971	3.28971	2.48647	3.28971	3.28971
	11	2.92641	3.28971	3.28971	3.28971	3.28971	3.28971	3.28971	2.92641	2.48647	2.48647	3.28971		11	3.28971	3.28971	3.28971	3.28971	3.28971	3.28971	3.28971	2.92641	2.92641	2.92641
	12	3.23807	2.43484	2.87477	3.23807	3.23807	3.23807	3.23807	3.23807	2.86549	3.23807	3.23807		12	3.23807	3.23807	3.23807	2.87477	3.23807	3.23807	3.23807	2.86549	3.23807	2.87477

## Sheet: Supplement 3
	Sup 3a												Sup 3b												Sup 3c																Sup 3d
	Hit rate (eNpHR)												Lick rate (Hz) in Go trials (eNpHR)												Hit rate (eNpHR)																Lick rate (Hz) in Go trials (eNpHR)
	Mouse # Block #	1	2	3	4	5	6	7	8	9	10		Mouse # Time from cue onset (ms)	1	2	3	4	5	6	7	8	9	10		Mouse # Block #	1	2	3	4	5	6	7	8	9	10	11	12	13	14		Mouse # Time from cue onset (ms)	1	2	3	4	5	6	7	8
	1	0.333333	0	0.444444	0.111111	0	0	0.111111	0.666667	0.444444	0		100	0.546218	0	5.12605	2.20339	0.378151	0	0	4.15966	0.378151	1.61017		1	0.888889	0	0.333333	0	1	0.555556	0	0.333333	0.333333	0.444444	0	0.444444	0.333333	0.222222		100	0	1.05932	0.211864	0.168067	1.31356	0.798319	0	0.756303
	2	0.1	0	1	0	0.4	0	0	1	0.3	0.1		300	1.47059	0	6.89076	2.37288	0.798319	0	0	4.7479	0.840336	1.5678		2	1	0.2	0	0.2	0.9	0.3	0	0.4	0.7	0.6	0.5	0.8	0.2	1		300	0.672269	1.61017	0.381356	0.294118	2.5	0.966387	0	2.26891
	3	0	0	0.9	0.6	0.7	0	0	1	0.8	0.9		500	1.09244	0.0840336	6.09244	2.20339	1.09244	0	0	4.95798	0.630252	1.90678		3	1	0	0.6	0.2	0.9	0.8	0	0.9	1	0.7	0.2	0.8	0.1	1		500	1.13445	3.00847	1.27119	0.294118	3.09322	0.966387	0	2.35294
	4	0	0	0.5	1	0.6	0	0	1	0.5	0.6		700	1.21849	0	6.09244	2.28814	1.09244	0	0.0423729	5.42017	0.420168	1.82203		4	1	0.3	0.6	0.5	0.8	0.7	0.1	1	0.5	0.5	0.3	1	0.7	1		700	1.59664	4.19492	0.932203	0.462185	2.9661	1.09244	0	3.86555
	5	0	0	1	1	0.4	0	0.1	1	0.5	1		900	1.30252	0	5.12605	3.00847	1.47059	0	0.0423729	4.87395	0.378151	1.44068		5	1	0.6	0	0.1	0.9	0.2	0	1	0.6	0.8	0.5	1	1	1		900	2.01681	5	0.762712	0.378151	2.92373	1.38655	0	5.08403
	6	0.4	0	0.8	1	0.5	0	0	0.9	0.1	0.8		1100	1.34454	0.0420168	4.95798	2.9661	1.55462	0	0.0423729	5.16807	0.630252	1.94915		6	1	1	0.3	0.3	0.7	0.4	0	1	0.6	1	0.6	0.9	1	1		1100	2.56303	4.95763	1.05932	0.546218	3.05085	1.76471	0	5.7563
	7	0.9	0	0.8	1	0.6	0	0	0.8	0	1		1300	1.05042	0	4.57983	3.09322	1.47059	0	0	5	0.210084	1.90678		7	1	1	0.7	0.2	0.9	0.5	0	1	0.6	0.8	0	0.9	0.7	1		1300	2.85714	4.70339	0.805085	0.504202	3.09322	1.42857	0	5.88235
	8	0.8	0	0.6	1	0.2	0	0	1	0	1		1500	0.882353	0	4.53782	3.51695	1.59664	0	0	5.04202	0.630252	2.24576		8	1	1	0.7	0	0.7	0.3	0	1	0.3	1	0	1	1	1		1500	4.20168	5.21186	0.974576	0.630252	3.22034	1.63866	0	6.47059
	9	0.9	0	1	0.9	0.8	0	0	1	0.1	0.9		1700	1.30252	0	4.87395	3.94068	1.93277	0	0.0423729	5.33613	0.378151	2.75424		9	1	1	0.7	0.1	0	0.4	0	1	0.3	0.9	0	0.8	0.9	1		1700	5.29412	4.70339	1.31356	0.714286	3.68644	1.30252	0	6.30252
	10	0.2	0	0.7	1	0.3	0	0	0.5	0	1		1900	1.68067	0	6.55462	5.88983	2.60504	0	0	5.37815	0.546218	3.55932		10	1	1	0.7	0	0	0.3	0	1	0.7	0.7	0	0.1	1	0.9		1900	7.47899	6.01695	1.52542	0.882353	4.66102	2.05882	0	7.43697
	11	0.4	0	0.7	0.8	0.4	0	0	0.9	0.1	1		2100	1.93277	0	6.76471	5.72034	2.77311	0	0.0847458	6.72269	0.672269	5.16949		11	1	1	0	0	0	0.5	0	0.8	0.1	0.6	0	0	0.9	1		2100	7.18487	5.63559	1.82203	0.882353	4.11017	2.18487	0	6.76471
	12	0.3	0	1	0.888889	0.3	0	0	1	0.2	1		2300	2.31092	0	6.51261	5.9322	3.02521	0	0	6.34454	0.588235	4.95763		12	1	1	0	0	0	0.7	0	0.9	0	0.888889	0	0	0.444444	1		2300	7.26891	4.91525	1.86441	0.756303	3.89831	2.77311	0	6.21849
													2500	2.05882	0	6.76471	5.97458	2.60504	0	0	6.42857	0.92437	5.04237																		2500	8.02521	4.91525	1.94915	0.714286	4.02542	2.89916	0.0423729	6.34454
	Hit rate (eGFP)												2700	2.18487	0	6.2605	5.80508	2.77311	0	0	6.30252	1.2605	6.10169		Hit rate (eGFP)																2700	7.56303	4.74576	2.58475	0.336134	3.55932	3.19328	0	5.37815
	Mouse # Block #	1	2	3	4	5	6	7	8				2900	2.18487	0	5.67227	5.38136	2.31092	0	0	5.88235	1.34454	5.16949		Mouse # Block #	1	2	3	4	5	6	7	8	9	10	11	12	13	14		2900	5.92437	4.36441	2.20339	0.420168	3.77119	3.36134	0	5
	1	0.444444	0.555556	1	0.777778	0.222222	0.333333	0.555556	0.333333																1	0.222222	1	0.888889	1	1	0.111111	1	0.888889	0.444444	0.666667	0	0.111111	0.444444	0.444444
	2	1	0.9	0.9	1	0.8	0.2	0.8	0.9				Lick rate (Hz) in Go trials (eGFP)												2	0.2	1	0.8	0.9	1	0.2	0.8	0.9	0.6	1	0.1	0	0.8	0.8		Lick rate (Hz) in Go trials (GFP)
	3	1	0.6	1	0.4	1	0.5	1	1				Mouse # Time from cue onset (ms)	1	2	3	4	5	6	7	8				3	0.7	1	1	0.8	1	0.5	0.6	0.8	0.3	1	0.6	0.4	0.9	0.7		Mouse # Time from cue onset (ms)	1	2	3	4	5	6	7	8
	4	0.9	1	1	0.1	1	0.8	0.9	0.8				100	0.210084	0.588235	0.546218	1.01695	0.210084	0.462185	0.974576	0.677966				4	0.9	1	1	0.6	1	1	0.6	0.9	0.6	1	0.9	0.8	0.7	0.6		100	0.0420168	0.169492	0.168067	0.546218	0.546218	1.05932	2.28814	1.01695
	5	1	1	1	0.1	1	0.7	1	0.8				300	1.09244	1.05042	1.47059	1.35593	0.378151	0.882353	2.58475	1.22881				5	0.9	1	1	0.7	1	1	0.9	0.9	0.4	1	1	0.9	0.9	0.7		300	0.168067	0.29661	0.294118	0.966387	3.27731	1.82203	3.60169	2.37288
	6	1	1	0.9	0.4	1	0.9	0.7	0.8				500	1.47059	2.14286	2.73109	2.20339	2.05882	1.30252	2.37288	1.44068				6	1	1	1	0.7	1	0.9	0.7	0.9	0.8	1	1	1	0.8	0.5		500	0.210084	0.847458	0.672269	1.38655	4.28571	2.92373	5.33898	1.22881
	7	1	1	0.9	0.5	1	0.5	0.9	1				700	2.52101	3.44538	4.53782	2.11864	2.31092	1.97479	3.51695	1.39831				7	1	1	1	0.7	1	1	0.8	0.8	0.4	1	1	1	0.3	0.8		700	0.462185	1.18644	2.14286	1.47059	3.44538	4.44915	5.4661	1.90678
	8	1	1	0.8	0.4	1	0.7	0.8	0.2				900	4.62185	4.53782	6.38655	2.5	2.89916	2.56303	3.4322	1.44068				8	1	1	1	1	1	1	0.8	0.8	0.6	1	1	0.9	0.3	0.5		900	0.798319	2.58475	5.84034	1.72269	3.19328	5.29661	5.50847	2.11864
	9	1	1	0.9	0.6	1	0.5	0.6	0.2				1100	4.91597	5.54622	6.84874	2.88136	4.28571	2.35294	4.0678	1.14407				9	1	1	1	1	1	0.9	0.9	0.9	0.7	1	0.9	1	0.1	0.8		1100	1.76471	4.23729	6.93277	1.2605	3.44538	5.88983	5.67797	2.41525
	10	0.9	1	0.8	0.7	1	1	0.3	0.7				1300	4.95798	5.88235	8.82353	2.66949	5	2.64706	2.9661	1.44068				10	1	1	1	0.9	1	1	0.9	1	0.6	1	1	1	0	0.9		1300	2.22689	6.27119	7.60504	1.42857	4.36975	5.9322	5.88983	2.20339
	11	1	1	1	0.8	1	0.9	0.7	0.5				1500	5.42017	5.96639	7.85714	2.37288	5.2521	2.60504	3.38983	1.31356				11	1	1	1	1	1	1	0.9	1	0.7	1	1	1	0.1	0.7		1500	3.36134	6.94915	7.56303	2.05882	6.21849	6.10169	5.4661	2.62712
	12	1	1	1	0.666667	1	0.7	0.333333	0				1700	6.17647	7.26891	8.82353	2.5	6.38655	3.48739	3.22034	1.52542				12	1	1	1	1	1	1	0.444444	0.555556	0.777778	0.9	1	1	0.5	0.5		1700	5	7.16102	8.23529	2.26891	6.59664	6.52542	5.38136	4.32203
													1900	8.27731	8.82353	9.95798	2.79661	7.52101	4.78992	4.11017	2.66949																				1900	6.05042	8.64407	9.03361	3.10924	8.57143	7.0339	6.48305	5.33898
	FA rate (eNpHR)												2100	7.52101	7.64706	10.4202	3.00847	6.72269	4.36975	4.11017	3.00847				FA rate (eNpHR)																2100	6.42857	7.54237	7.89916	3.9916	7.98319	6.44068	5.88983	5.72034
	Mouse # Block #	1	2	3	4	5	6	7	8	9	10		2300	7.10084	8.02521	10.4202	3.26271	6.2605	4.28571	4.32203	3.30508				Mouse # Block #	1	2	3	4	5	6	7	8	9	10	11	12	13	14		2300	6.30252	6.10169	7.98319	3.44538	7.56303	6.27119	5.42373	6.27119
	1	0.181818	0	0.454545	0.181818	0	0	0.272727	0.727273	0.363636	0.0909091		2500	7.31092	7.22689	10.5882	3.00847	5.37815	4.28571	5.12712	4.15254				1	0.727273	0.181818	0.181818	0.272727	0.909091	0.363636	0.0909091	0.181818	0.454545	0.454545	0.272727	0.909091	0.545455	0.363636		2500	6.13445	4.95763	7.22689	3.40336	7.56303	5.63559	5	6.01695
	2	0	0	0.9	0.2	0.1	0	0	1	0.4	0.1		2700	6.97479	7.18487	11.0504	3.34746	4.15966	4.45378	4.74576	4.36441				2	0.9	0.1	0.1	0.1	0.8	0.2	0	0.4	0.5	0.9	0.6	0.7	0.5	0.7		2700	6.09244	3.38983	7.18487	2.56303	6.47059	5.04237	3.98305	5.21186
	3	0.1	0.1	1	0.4	0.7	0	0	0.9	0.8	0.8		2900	6.59664	7.39496	11.3866	2.79661	4.03361	4.36975	5.4661	4.44915				3	0.9	0	0.4	0.5	0.8	0.5	0	0.7	0.7	0.6	0.2	0.9	0.3	0.5		2900	5.5042	1.94915	6.17647	2.73109	6.80672	3.4322	3.00847	5.12712
	4	0	0.1	0.8	0.9	0.6	0	0	1	0.6	0.8														4	0.7	0.4	0.7	0.3	0.9	0.5	0	0.8	0.6	0.6	0.4	1	0.8	0.7
	5	0	0	1	0.9	0	0	0	1	0.4	1		Lick rate (Hz) in No-Go trials (eNpHR)												5	0.6	0.8	0.1	0.1	0.6	0.3	0	0.9	0.2	0.8	0.2	1	0.8	0.6		Lick rate (Hz) in No-Go trials (eNpHR)
	6	0.1	0	0.7	1	0.5	0	0	1	0.3	0.9		Mouse # Time from cue onset (ms)	1	2	3	4	5	6	7	8	9	10		6	0.7	0.7	0.2	0.8	0.4	0.4	0	0.4	0.4	0.9	0.4	0.9	0.7	0.6		Mouse # Time from cue onset (ms)	1	2	3	4	5	6	7	8
	7	0.5	0	0.8	0.9	0.3	0	0	1	0.1	1		100	0.458333	0	5.08333	2.43802	0.375	0	0	4.16667	0.291667	1.61157		7	0.7	1	0.8	0	0.4	0.6	0	0.8	0.8	1	0	0.7	0.8	0.6		100	0.125	1.07438	0.247934	0.333333	1.1157	1.04167	0	1.08333
	8	0.9	0	0.9	0.9	0	0	0	1	0.1	1		300	1.54167	0	6.45833	2.43802	1.20833	0	0	3.91667	0.666667	1.81818		8	0.6	0.9	0.7	0	0.5	0.2	0	0.3	0.4	0.8	0	1	0.9	0.4		300	0.541667	1.40496	0.495868	0.5	2.19008	0.875	0	2.33333
	9	0.7	0	0.8	0.9	0.1	0	0	0.9	0.1	1		500	1.16667	0	5.54167	2.72727	1.16667	0	0	4.79167	0.416667	1.69421		9	0.5	0.9	0.6	0.1	0	0.4	0	0.3	0.5	0.8	0	0.9	1	0.3		500	0.583333	2.47934	1.69421	0.416667	2.7686	0.75	0.0826446	1.875
	10	0.4	0	0.7	0.8	0.1	0	0	0.7	0	0.9		700	1	0	5.91667	2.89256	1.25	0	0	4.875	0.375	1.98347		10	0.1	0.7	0.2	0	0	0.3	0	0.4	0.5	0.8	0	0.3	0.7	0.2		700	0.958333	2.80992	0.785124	0.75	3.01653	1.08333	0	1.91667
	11	0.2	0	0.9	0.8	0.1	0	0	1	0.2	0.9		900	1.16667	0	5.29167	3.18182	1.125	0	0	5.08333	0.583333	2.19008		11	0.4	0.6	0	0	0	0.4	0	0.1	0.3	0.6	0	0	0.5	0.2		900	1.25	3.22314	0.991736	0.666667	2.72727	1.5	0	1.95833
	12	0	0	0.888889	0.7	0	0	0	0.777778	0.222222	1		1100	0.958333	0	5.08333	2.80992	1.25	0	0.0413223	5.08333	0.416667	2.10744		12	0.222222	0.5	0.2	0	0	0.444444	0	0	0	0.9	0	0	0.1	0		1100	2	3.1405	1.32231	0.541667	2.56198	1.75	0	2.29167
													1300	1.25	0	4.91667	3.22314	0.916667	0	0	5.04167	0.291667	2.06612																		1300	2.29167	3.63636	0.991736	0.75	2.56198	1.29167	0	2.20833
	FA rate (eGFP)												1500	1.125	0	4.45833	3.09917	1.29167	0	0	5.625	0.375	2.89256		FA rate (eGFP)																1500	2.54167	3.34711	1.07438	0.666667	2.60331	1.41667	0	2.20833
	Mouse # Block #	1	2	3	4	5	6	7	8				1700	1.04167	0.0416667	4.625	3.05785	1.08333	0	0	4.95833	0.625	2.47934		Mouse # Block #	1	2	3	4	5	6	7	8	9	10	11	12	13	14		1700	2.875	3.34711	0.950413	0.75	1.98347	1.58333	0	2.58333
	1	0.545455	0.818182	1	0.818182	0.272727	0.636364	0.818182	0.818182				1900	1.125	0	3.5	2.7686	1.04167	0	0.0826446	4.79167	0.666667	2.60331		1	0.545455	0.909091	0.727273	1	1	0.181818	0.909091	1	0.454545	0.363636	0.272727	0.0909091	0.818182	0.545455		1900	2.875	3.22314	1.03306	0.5	1.8595	1.54167	0	2.45833
	2	1	1	0.9	0.8	0.6	0.5	0.8	1				2100	0.958333	0	3.16667	2.39669	1.08333	0	0	4.83333	0.666667	2.14876		2	0.6	0.8	0.6	0.7	1	0.3	0.8	0.8	0.5	1	0.5	0	0.9	0.8		2100	2.29167	3.01653	0.991736	0.791667	1.57025	1.5	0	2.125
	3	0.9	0.7	0.9	0.9	0.6	0.2	0.8	1				2300	1.125	0.0416667	2.875	2.27273	0.833333	0	0.0413223	4.79167	0.708333	2.02479		3	0.5	0.8	0.3	0.1	1	0.4	0.8	0.5	0.5	0.9	0.9	0.3	0.8	0.9		2300	1.83333	2.93388	1.15702	0.666667	1.36364	1.125	0	2.25
	4	0.7	0.8	0.5	0.4	0.6	0.8	0.7	0.8				2500	0.791667	0	2.58333	2.14876	0.625	0	0.0413223	4.45833	0.458333	2.19008		4	0.6	0.2	0.1	0.2	0.9	1	0.8	1	0.3	0.8	0.9	0.7	0.9	0.6		2500	1.41667	2.89256	1.19835	0.916667	1.61157	1.20833	0	1.45833
	5	0.8	0.9	0.6	0.2	0.5	0.6	0.6	0.8				2700	0.958333	0	2.25	1.90083	0.583333	0	0	4.16667	0.541667	1.90083		5	0.5	0.2	0.1	0.5	0.6	1	1	0.8	0.1	0.6	1	0.7	0.8	0.5		2700	0.75	2.72727	0.578512	0.708333	1.03306	0.833333	0.0413223	1.54167
	6	0.5	0.4	0.7	0.3	0.5	0.5	0.7	0.7				2900	0.791667	0	1.75	2.2314	0.583333	0	0	3.54167	0.75	1.73554		6	0.5	0.1	0.1	0.3	0.8	1	0.9	1	0.4	0.7	0.8	0.7	1	0.6		2900	0.416667	2.02479	0.578512	0.708333	1.4876	0.666667	0	1.375
	7	0.5	0.6	0.7	0.6	0.5	0.4	0.4	0.7																7	0.2	0	0.1	0.4	0.7	0.8	0.9	0.6	0.4	0.5	0.8	0.8	0.5	0.7
	8	0.4	0.4	0.5	0.1	0.3	0.3	0.3	0.4				Lick rate (Hz) in No-Go trials (eGFP)												8	0.3	0	0	0.2	0.4	0.9	0.7	1	0.8	0.6	1	0.5	0.6	0.4		Lick rate (Hz) in No-Go trials (GFP)
	9	0.3	0.4	0.3	0.4	0.4	0.2	0.8	0.2				Mouse # Time from cue onset (ms)	1	2	3	4	5	6	7	8				9	0	0	0.2	0.2	0.6	0.7	0.6	0.8	0.5	0.4	0.3	0.6	0.1	0.6		Mouse # Time from cue onset (ms)	1	2	3	4	5	6	7	8
	10	0.1	0.4	0.4	0.5	0.4	0.2	0.5	0.8				100	0.291667	0.541667	1.375	1.28099	0.25	0.75	0.826446	0.950413				10	0.1	0	0	0	0.5	0.5	0.7	0.5	0.4	0.3	0.6	0.5	0	0.5		100	0.416667	0.0413223	0.208333	1	0.375	0.53719	3.09917	1.07438
	11	0.1	0.2	0.4	0.4	0.1	0.4	0.3	0.7				300	1.20833	1.625	2.08333	1.73554	0.583333	0.916667	2.68595	0.950413				11	0.1	0	0	0.3	0.3	0.8	0.7	0.4	0.6	0.3	0.6	0.6	0.1	0.7		300	0.291667	0.413223	0.416667	1.29167	3.25	1.8595	3.8843	2.14876
	12	0.111111	0.222222	0.333333	0.7	0.333333	0.222222	0.3	0				500	1.70833	1.58333	3.33333	1.77686	1.625	1.125	1.90083	1.23967				12	0	0	0	0.222222	0.444444	0.7	0.5	0.2	0.5	0.111111	0.555556	0.2	0.666667	0.333333		500	0.416667	0.413223	1.45833	2.04167	4.45833	2.64463	5.7438	1.61157
													700	1.625	1.58333	4	1.61157	1.33333	1.20833	2.68595	0.826446																				700	0.666667	0.413223	2.66667	1.79167	3.25	3.63636	5.82645	1.52893
													900	1.70833	2.16667	3.41667	1.61157	1.41667	1.375	2.19008	0.785124																				900	0.791667	0.454545	2.125	1.45833	2.375	3.80165	6.03306	1.32231
													1100	1.58333	2.04167	6.125	1.44628	1.625	1.125	1.69421	1.03306																				1100	0.916667	0.330579	1.25	1.41667	2.375	4.09091	6.15702	1.32231
													1300	1.83333	2.20833	5.125	1.40496	1.70833	1.54167	1.4876	1.57025																				1300	0.666667	0.330579	1	0.958333	2.45833	4.33884	5.61983	1.57025
													1500	1.83333	2.16667	4.83333	1.52893	2.04167	1.5	1.4876	1.73554																				1500	0.791667	0.578512	1.125	0.708333	3.08333	4.04959	5.66116	1.4876
													1700	2	2.20833	4.20833	1.81818	1.79167	1.54167	1.81818	2.06612																				1700	0.833333	0.661157	0.625	0.833333	3.25	4.13223	5.82645	1.36364
													1900	2.25	2.375	4.875	1.57025	2.04167	1.45833	1.73554	1.81818																				1900	0.75	0.909091	1.04167	0.5	3.08333	3.92562	5.41322	1.44628
													2100	2	2.16667	5.16667	1.65289	1.83333	1.45833	1.15702	1.81818																				2100	0.75	0.909091	0.583333	0.791667	2.91667	3.8843	5.20661	1.40496
													2300	2.29167	2.04167	4.375	1.69421	1.79167	1.29167	1.4876	1.69421																				2300	0.75	1.07438	0.583333	0.583333	2.75	3.55372	5.33058	1.32231
													2500	2.25	2.20833	4.04167	1.44628	1.04167	1.20833	1.61157	1.1157																				2500	0.625	1.15702	0.375	0.5	2.16667	2.72727	4.17355	1.28099
													2700	1.91667	2.375	4.25	1.81818	1.16667	1.16667	1.19835	1.61157																				2700	0.708333	0.909091	0.458333	0.625	1.41667	2.72727	4.38017	1.28099
													2900	1.91667	2.25	3.16667	1.61157	1	0.916667	1.52893	1.44628																				2900	1.125	0.785124	0.291667	0.458333	1.16667	2.06612	3.47107	1.23967
[truncated: 18 more columns]

## Sheet: Supplement 4
	Sup 4a				Sup 4b				Sup 4c				Sup 4d				Sup 4e				Sup 4f
	Hit rate (eOPN)				FA rate (eOPN)				d' (eOPN)				Hit rate (eNpHR)				FA rate (eNpHR)				d' (eNpHR)
	Mouse #	Laser off	Laser on		Mouse #	Laser off	Laser on		Mouse #	Laser off	Laser on		Mouse #	Laser off	Laser on		Mouse #	Laser off	Laser on		Mouse #	Laser off	Laser on
	1	1	1		1	0.0909091	0.266667		1	3.65394	2.87385		1	0.951613	0.988636		1	0.0116279	0		1	3.9299	4.68981
	2	1	1		2	0.0188679	0		2	4.30932	4.53748		2	1	1		2	0.0246914	0.0144928		2	4.40481	4.68579
	3	1	1		3	0.0465116	0.173913		3	3.97456	3.2168		3	1	1		3	0	0		3	4.96359	4.93014
	4	1	1		4	0.0217391	0		4	4.33784	4.51939		4	0.983871	0.988636		4	0.0348837	0.190476		4	3.95462	3.15413
	5	1	1		5	0.0232558	0		5	4.25993	4.59794		5	0.987013	1		5	0.0263158	0.0410959		5	4.16453	4.20318
	6	1	1		6	0.113636	0.108696		6	3.51045	3.49368		6	1	1		6	0.012987	0.0410959		6	4.6817	4.22682
	7	1	1		7	0.205128	0.2		7	3.10999	3.12817		7	0.986301	0.973684		7	0.102564	0.180556		7	3.47289	2.85118
	8	1	1		8	0.0540541	0.0961538		8	3.94052	3.53539
	Hit rate (eGFP)				FA rate (eGFP)				d' (eGFP)				Hit rate (eGFP)				FA rate (eGFP)				d' (eGFP)
	Mouse #	Laser off	Laser on		Mouse #	Laser off	Laser on		Mouse #	Laser off	Laser on		Mouse #	Laser off	Laser on		Mouse #	Laser off	Laser on		Mouse #	Laser off	Laser on
	1	1	1		1	0.0196078	0.0512821		1	4.30332	3.95131		1	0.986486	0.986667		1	0	0		1	4.69525	4.68143
	2	1	1		2	0	0		2	4.5641	4.57288		2	1	0.985915		2	0.0266667	0.0405405		2	4.42545	3.93937
	3	0.852941	0.909091		3	0.0181818	0		3	3.14197	3.52453		3	1	1		3	0.04	0.108108		3	4.24393	3.69175
	4	1	1		4	0.027027	0.0384615		4	4.25275	4.01023		4	1	1		4	0	0		4	4.95126	4.93725
	5	1	1		5	0.0196078	0.025641		5	4.30332	4.26787		5	1	1		5	0.0857143	0.139241		5	3.86533	3.53374
	6	1	1		6	0	0		6	4.57288	4.56454		6	1	1		6	0.0232558	0.015873		6	4.3967	4.67891
	7	1	1		7	0.0909091	0.0444444		7	3.65394	3.95221
	8	1	1		8	0.210526	0.173077		8	3.11559	3.193
	9	1	1		9	0.128205	0.0784314		9	3.51644	3.5569
	10	1	1		10	0.025	0		10	4.25486	4.59555

[truncated: 11 more sheets: Supplement 6, Supplement 7, Supplement 8, Supplement 9, Supplement 10, Supplement 11, Supplement 12, Supplement 13, Supplement 14, Supplement 15, Sheet7]
